# Supplementary material for: In the pursuit of novel therapeutic agents: synthesis, anticancer evaluation, and physicochemical insights of novel pyrimidine-based 2-aminobenzothiazole derivatives
Source: Royal Society of Chemistry journal article supplement (doi:10.1039/d4ra01874e), 2024-01-01
Supplement: d4ra01874e1.pdf [file d4ra01874e1.pdf]

## **In the Pursuit of Novel Therapeutic Agents: Synthesis, Anticancer Evaluation, and Physicochemical Insights of Novel Pyrimidine-based 2-Aminobenzothiazole Derivatives**

Toka I. Ismail<sup>1</sup>, Nashwa El-Khazragy<sup>2,3</sup>, Rasha A. Azzam<sup>1</sup>

<sup>1</sup>*Chemistry Department, Faculty of Science, Helwan University, Cairo, Egypt, 11795*

<sup>2</sup>*Department of Clinical Pathology-Hematology, Ain Shams Medical Research Institute (MASRI), Faculty of Medicine, Ain Shams University, Cairo 11566, Egypt*

<sup>3</sup>*Department of Genetics and Molecular Biology, Egypt Center for Research and Regenerative Medicine (ECRRM), Cairo 11599, Egypt*

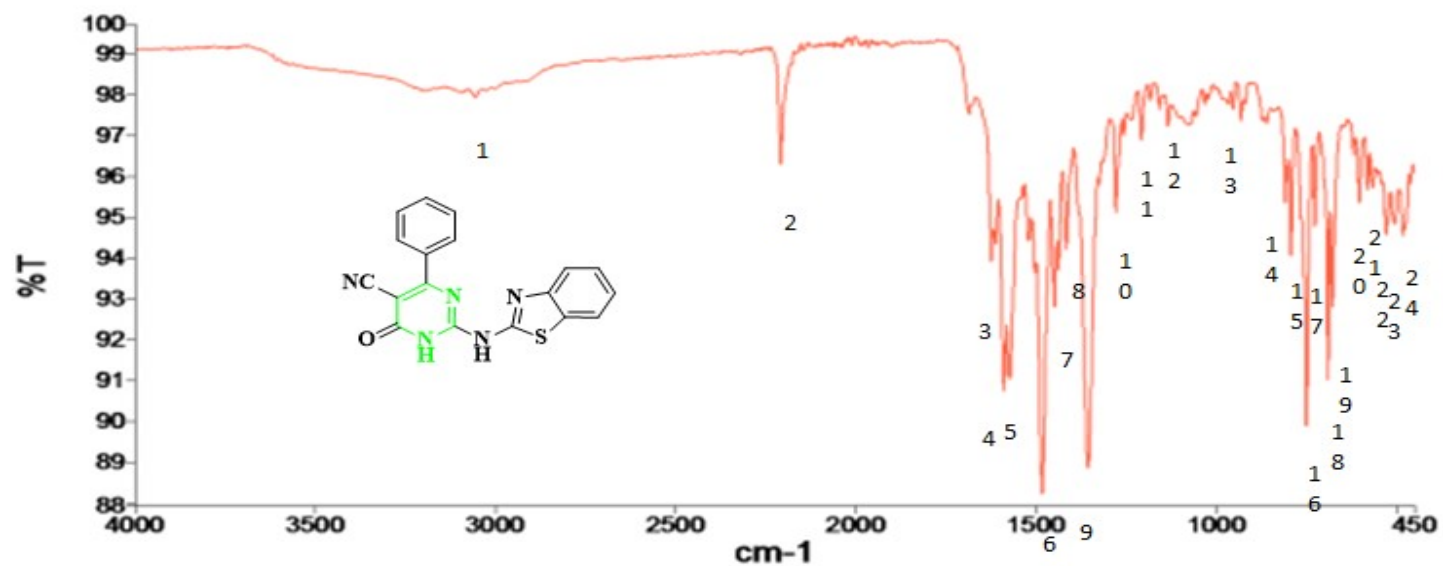

| No. | Position | Intinsty | No. | Position | Intinsty | No. | Position | Intinsty | No. | Position | Intinsty |
|-----|----------|----------|-----|----------|----------|-----|----------|----------|-----|----------|----------|
| 1   | 3058.10  | 97.97    | 7   | 1448.91  | 92.81    | 13  | 930.39   | 97.39    | 19  | 676.42   | 92.81    |
| 2   | 2209.58  | 96.33    | 8   | 1415.83  | 94.22    | 14  | 807.79   | 95.38    | 20  | 601.72   | 95.36    |
| 3   | 1624.58  | 93.94    | 9   | 1355.50  | 88.83    | 15  | 791.92   | 94.07    | 21  | 579.27   | 95.69    |
| 4   | 1589.13  | 90.74    | 10  | 1278.71  | 95.12    | 16  | 748.84   | 89.87    | 22  | 526.86   | 94.58    |
| 5   | 1572.21  | 91.02    | 11  | 1207.81  | 96.92    | 17  | 725.09   | 94.79    | 23  | 503.50   | 94.84    |
| 6   | 1482.98  | 88.20    | 12  | 1133.87  | 97.27    | 18  | 689.24   | 91.01    | 24  | 480.26   | 94.55    |

**Figure 1.** IR spectrum of compound 7a

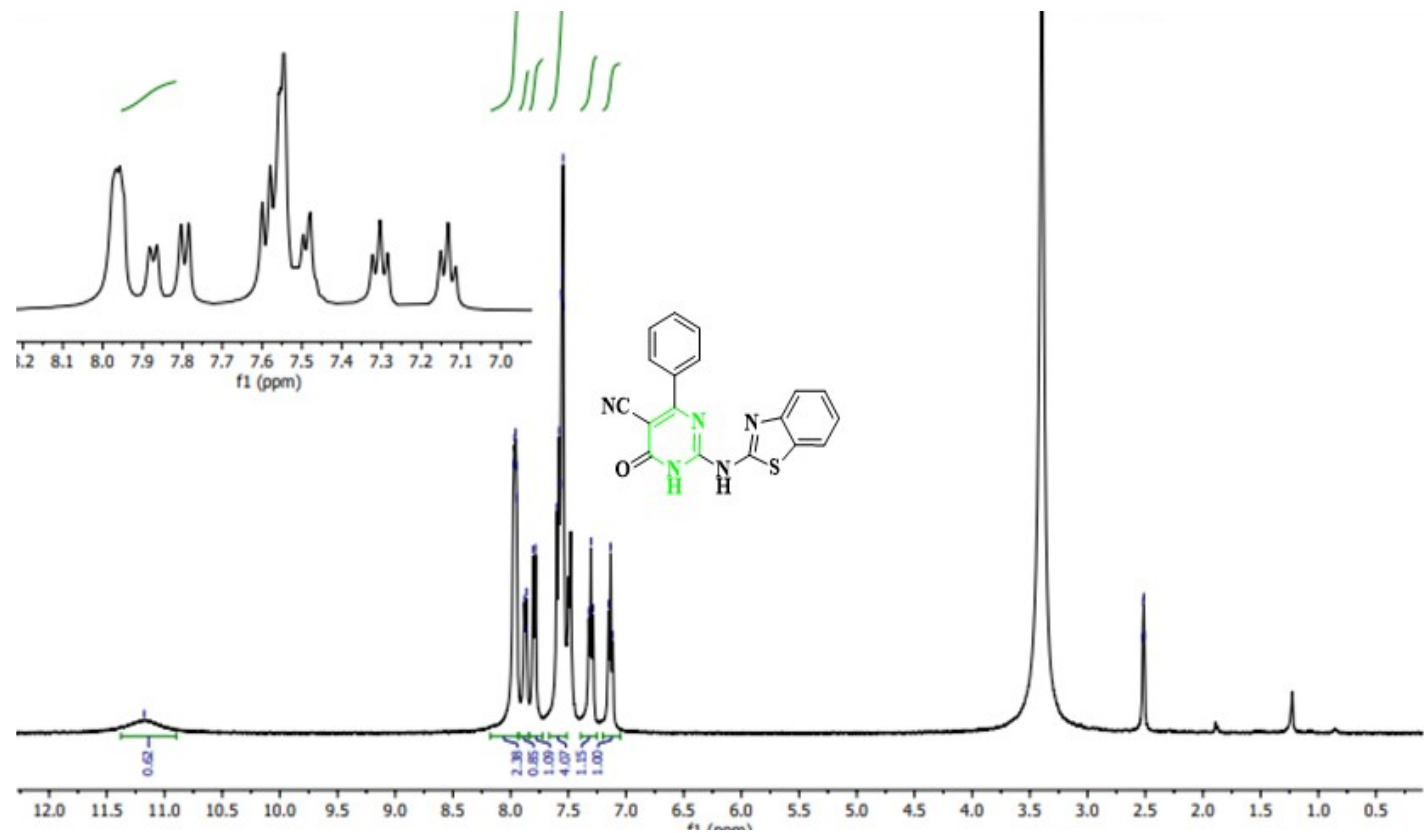

**Figure 2.** <sup>1</sup>H NMR spectrum of compound 7a

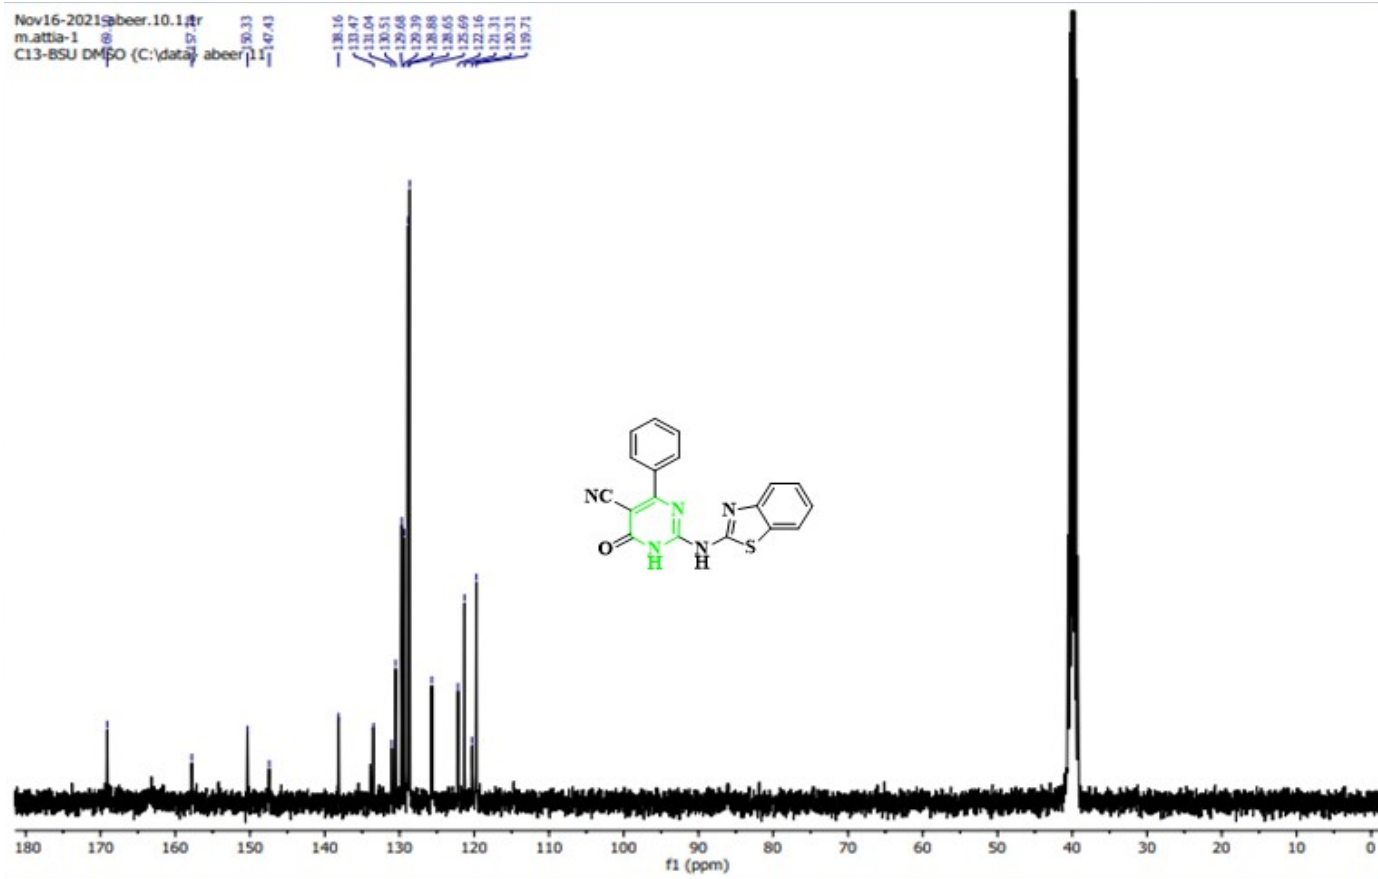

Figure 3.  $^{13}\text{C}$  NMR spectrum of compound 7a

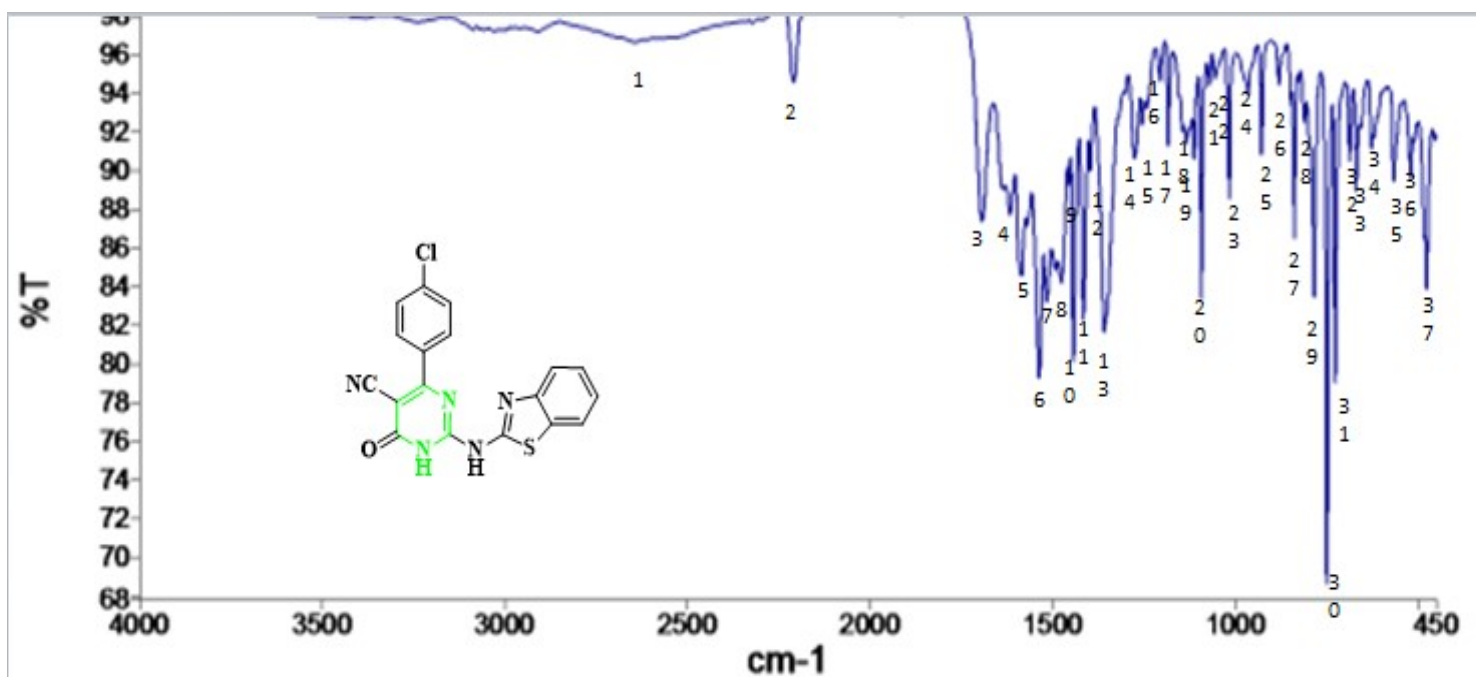

| No. | Position | Intinsty | No. | Position | Intinsty | No. | Position | Intinsty | No. | Position | Intinsty | No. | Position | Intinsty |
|-----|----------|----------|-----|----------|----------|-----|----------|----------|-----|----------|----------|-----|----------|----------|
| 1   | 2640.09  | 96.75    | 9   | 1456.16  | 89.26    | 17  | 1183.08  | 91.32    | 25  | 927.78   | 90.90    | 33  | 667.05   | 88.99    |
| 2   | 2210.17  | 94.63    | 10  | 1442.97  | 80.15    | 18  | 1133.67  | 91.47    | 26  | 880.01   | 94.48    | 34  | 626.14   | 91.20    |
| 3   | 1694.03  | 87.39    | 11  | 1415.59  | 82.34    | 19  | 1111.97  | 90.65    | 27  | 837.80   | 86.55    | 35  | 564.82   | 89.48    |
| 4   | 1617.26  | 87.75    | 12  | 1396.75  | 90.08    | 20  | 1092.21  | 83.41    | 28  | 810.05   | 92.58    | 36  | 519.40   | 89.66    |
| 5   | 1585.69  | 84.58    | 13  | 1358.93  | 81.68    | 21  | 1070.58  | 94.49    | 29  | 783.17   | 83.49    | 37  | 474.72   | 83.89    |
| 6   | 1537.44  | 79.31    | 14  | 1275.38  | 90.65    | 22  | 1054.71  | 94.84    | 30  | 748.44   | 68.58    |     |          |          |
| 7   | 1516.39  | 83.25    | 15  | 1255.09  | 92.44    | 23  | 1015.91  | 88.61    | 31  | 725.22   | 79.01    |     |          |          |
| 8   | 1475.74  | 84.22    | 16  | 1205.88  | 94.71    | 24  | 964.39   | 94.00    | 32  | 685.98   | 90.56    |     |          |          |

**Figure 4.** IR spectrum of compound **7b**

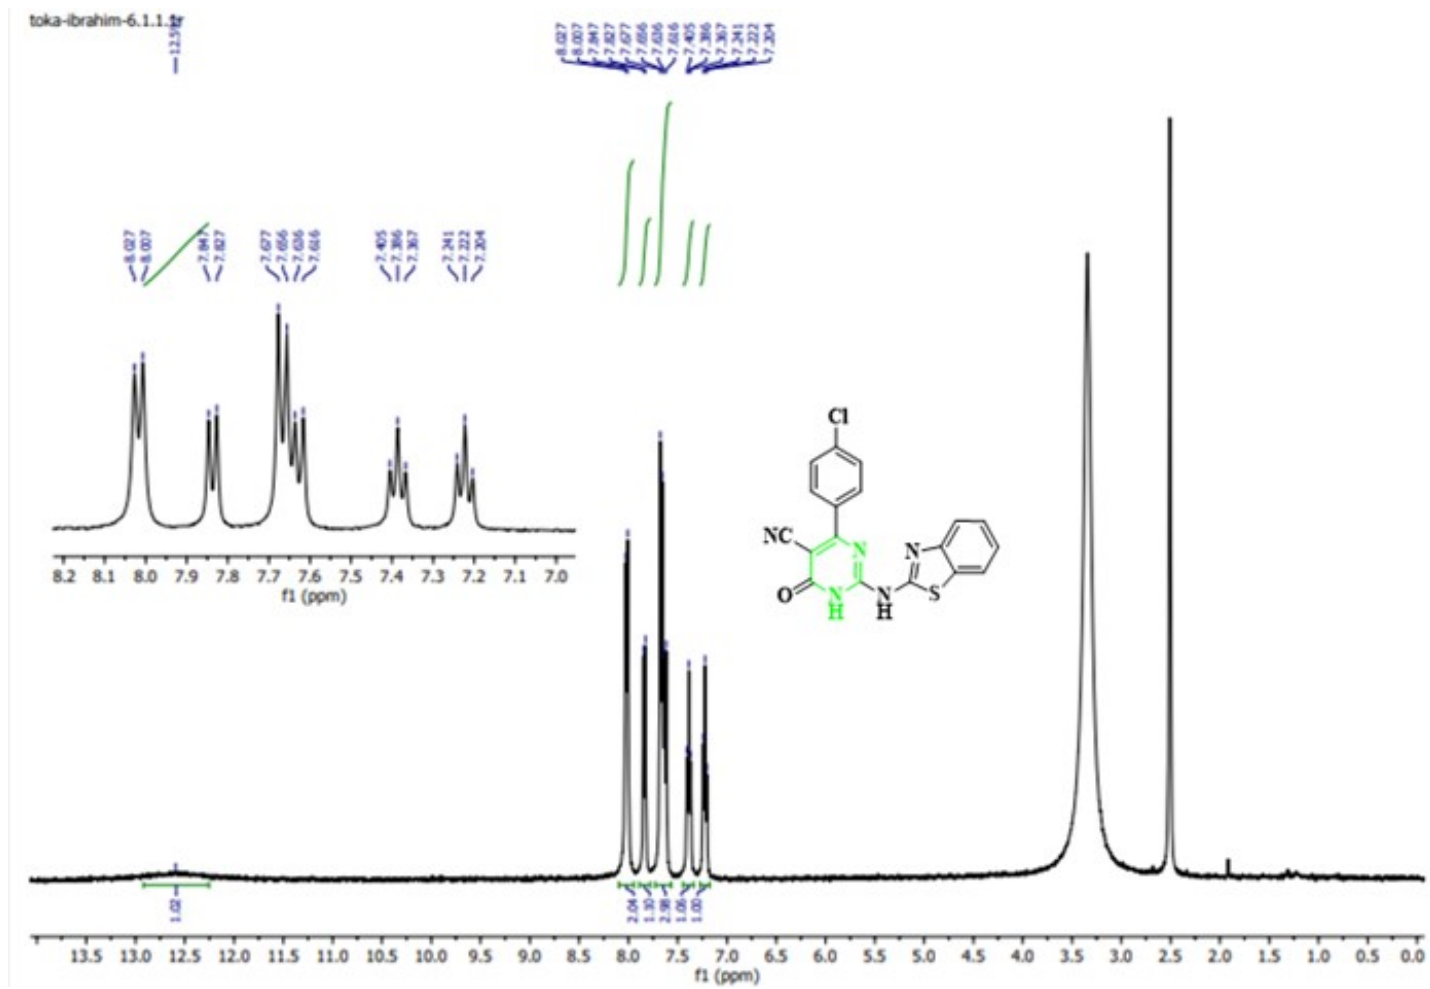

**Figure 5.**  $^1\text{H}$  NMR spectrum of compound 7b

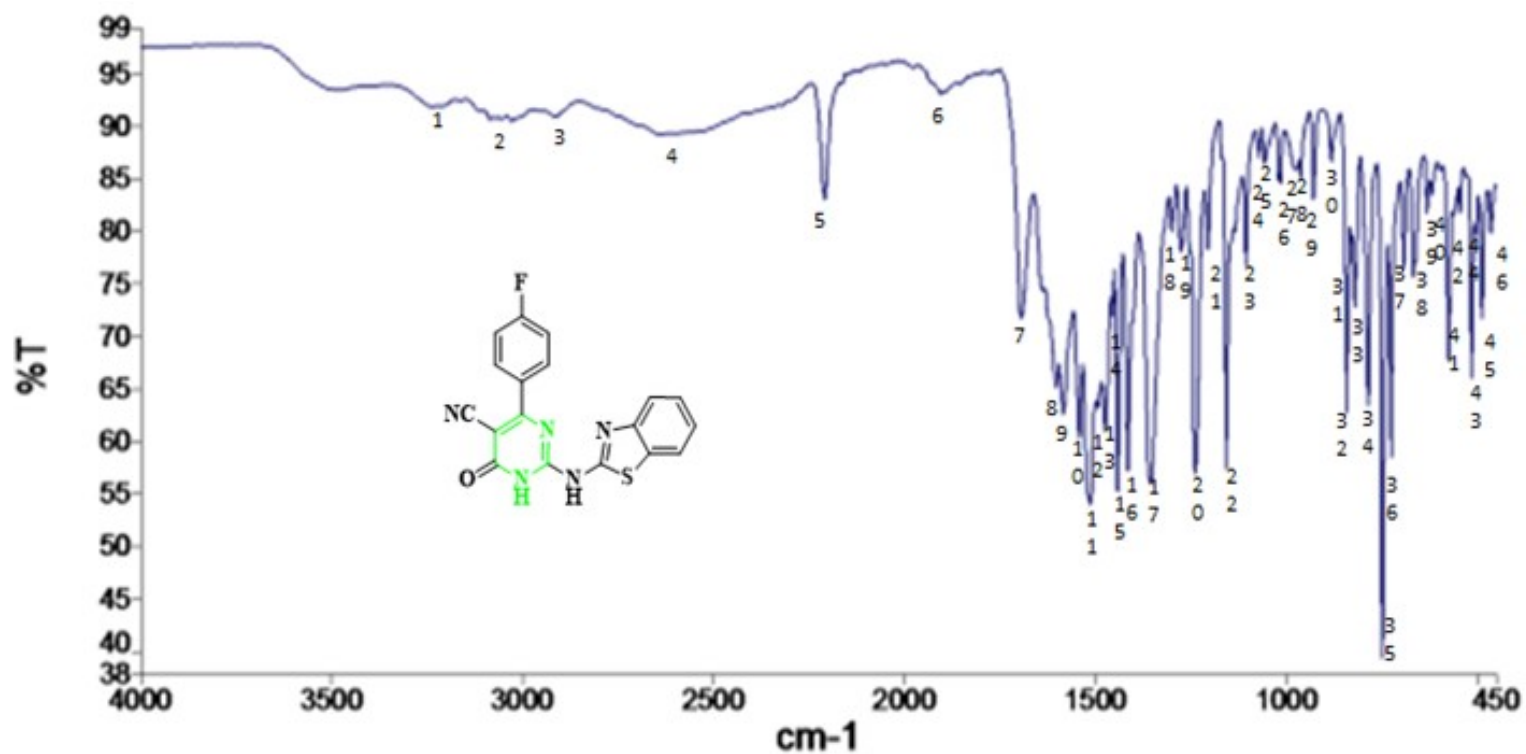

Figure 6. IR spectrum of compound 7c

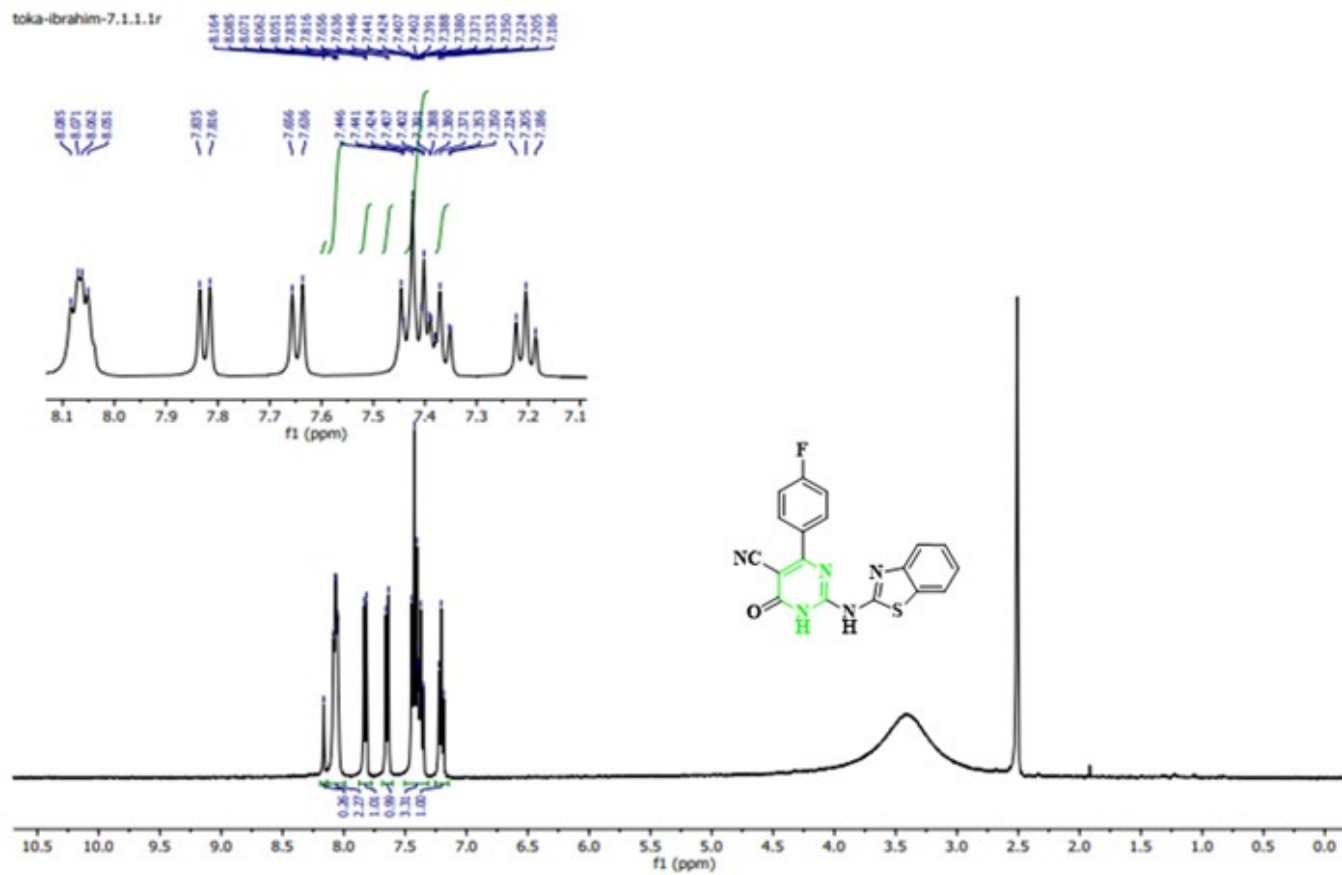

**Figure 7.**  $^1\text{H}$  NMR spectrum of compound 7c



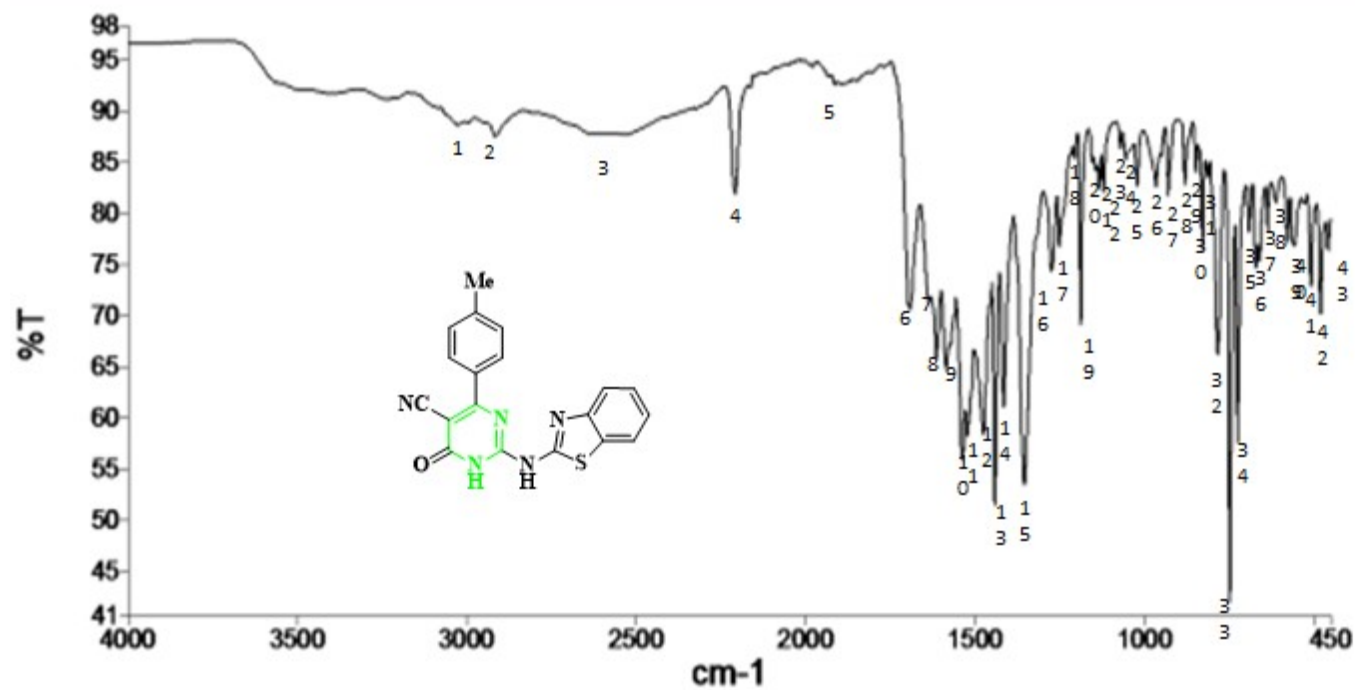

| No. | Position | Intinsty | No. | Position | Intinsty | No. | Position | Intinsty | No. | Position | Intinsty | No. | Position | Intinsty |
|-----|----------|----------|-----|----------|----------|-----|----------|----------|-----|----------|----------|-----|----------|----------|
| 1   | 3029.19  | 88.72    | 10  | 1536.70  | 55.88    | 19  | 1187.88  | 69.15    | 28  | 847.10   | 84.12    | 37  | 634.94   | 78.32    |
| 2   | 2918.35  | 87.62    | 11  | 1522.81  | 58.23    | 20  | 1133.86  | 82.57    | 29  | 828.07   | 76.48    | 38  | 610.34   | 81.19    |
| 3   | 2544.06  | 87.84    | 12  | 1475.47  | 58.39    | 21  | 1120.02  | 82.17    | 30  | 812.04   | 83.70    | 39  | 577.55   | 77.16    |
| 4   | 2209.86  | 81.98    | 13  | 1441.61  | 51.42    | 22  | 1070.30  | 86.46    | 31  | 783.02   | 66.23    | 40  | 555.76   | 76.92    |
| 5   | 1912.80  | 92.70    | 14  | 1415.79  | 61.01    | 23  | 1055.44  | 85.34    | 32  | 746.82   | 42.03    | 41  | 507.21   | 72.90    |
| 6   | 1692.31  | 70.65    | 15  | 1354.16  | 53.42    | 24  | 1021.13  | 82.76    | 33  | 723.88   | 57.60    | 42  | 478.58   | 70.18    |
| 7   | 1637.14  | 71.38    | 16  | 1274.52  | 74.41    | 25  | 965.32   | 82.67    | 34  | 690.20   | 78.24    | 43  | 456.14   | 76.34    |
| 8   | 1614.38  | 65.84    | 17  | 1250.83  | 76.80    | 26  | 929.25   | 81.8     | 35  | 670.10   | 74.75    |     |          |          |
| 9   | 1585.30  | 64.80    | 18  | 1206.37  | 85.49    | 27  | 880.07   | 82.86    | 36  | 659.41   | 75.41    |     |          |          |

**Figure 8.** IR spectrum of compound 7d

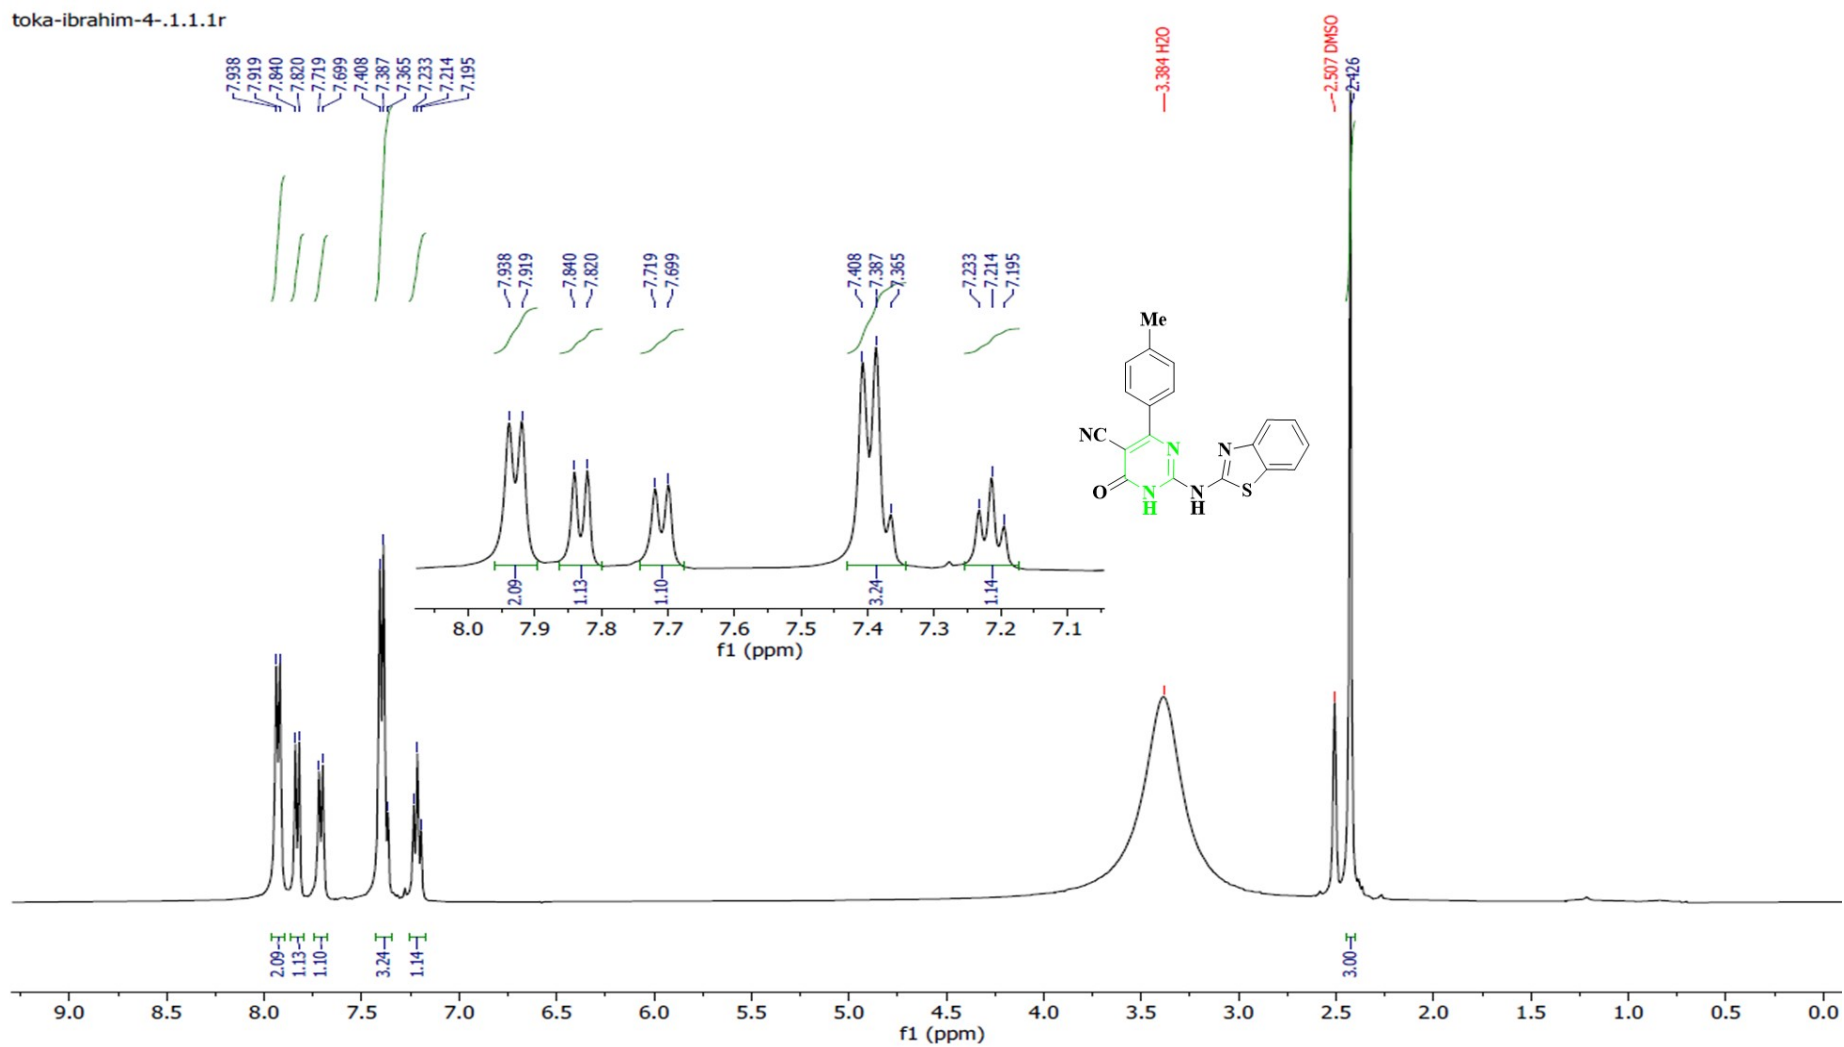

**Figure 9.** <sup>1</sup>H NMR spectrum of compound 7d

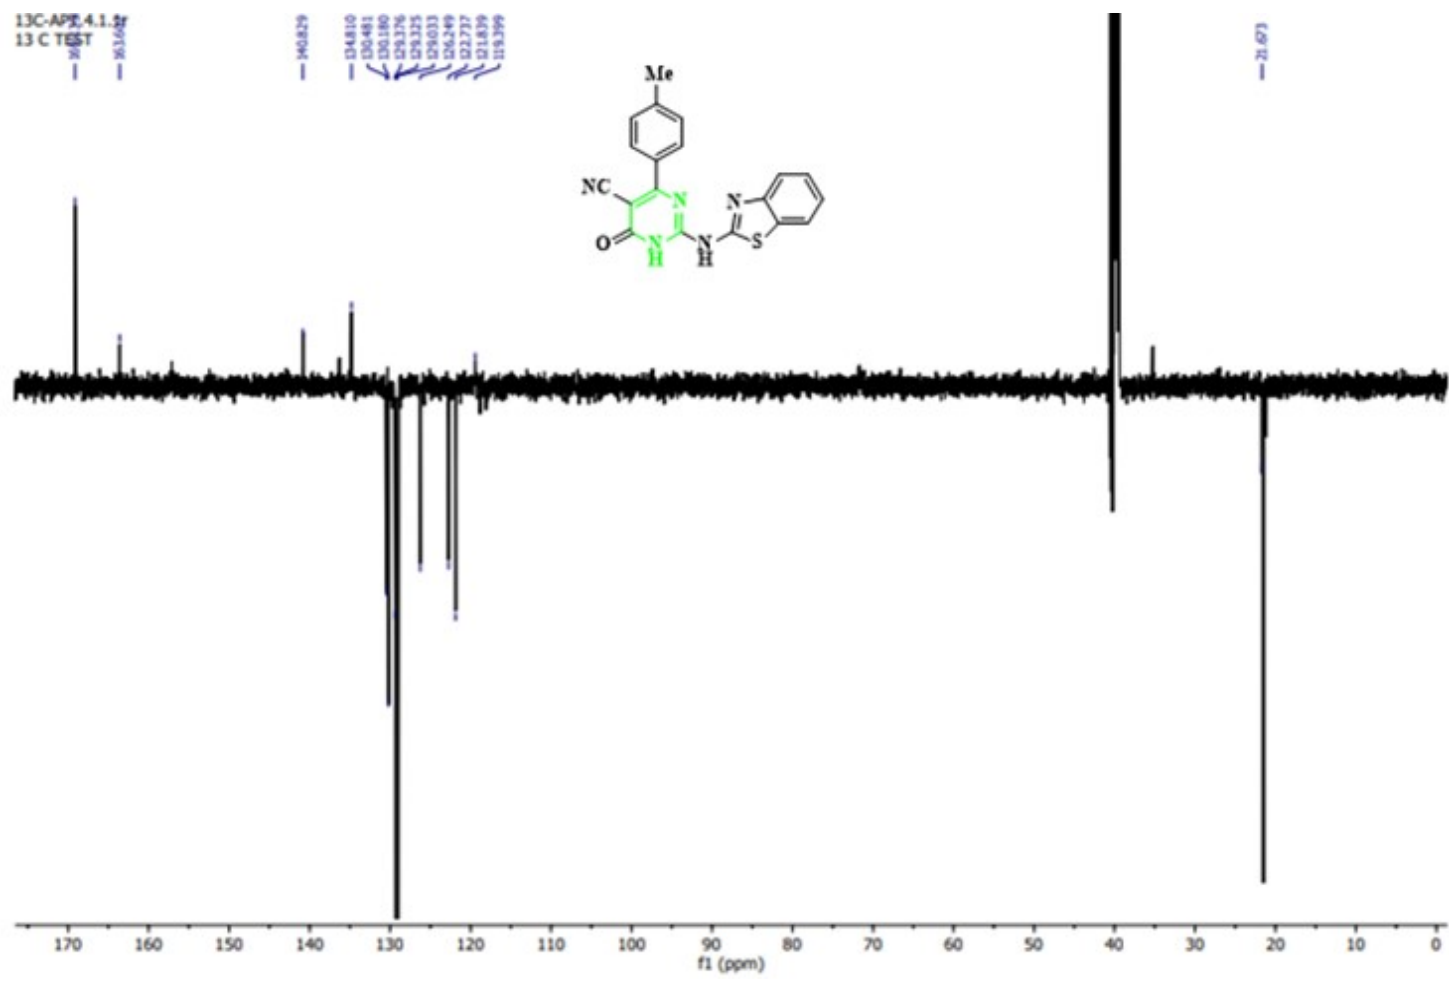

Figure 10. <sup>13</sup>C NMR spectrum of compound 7d

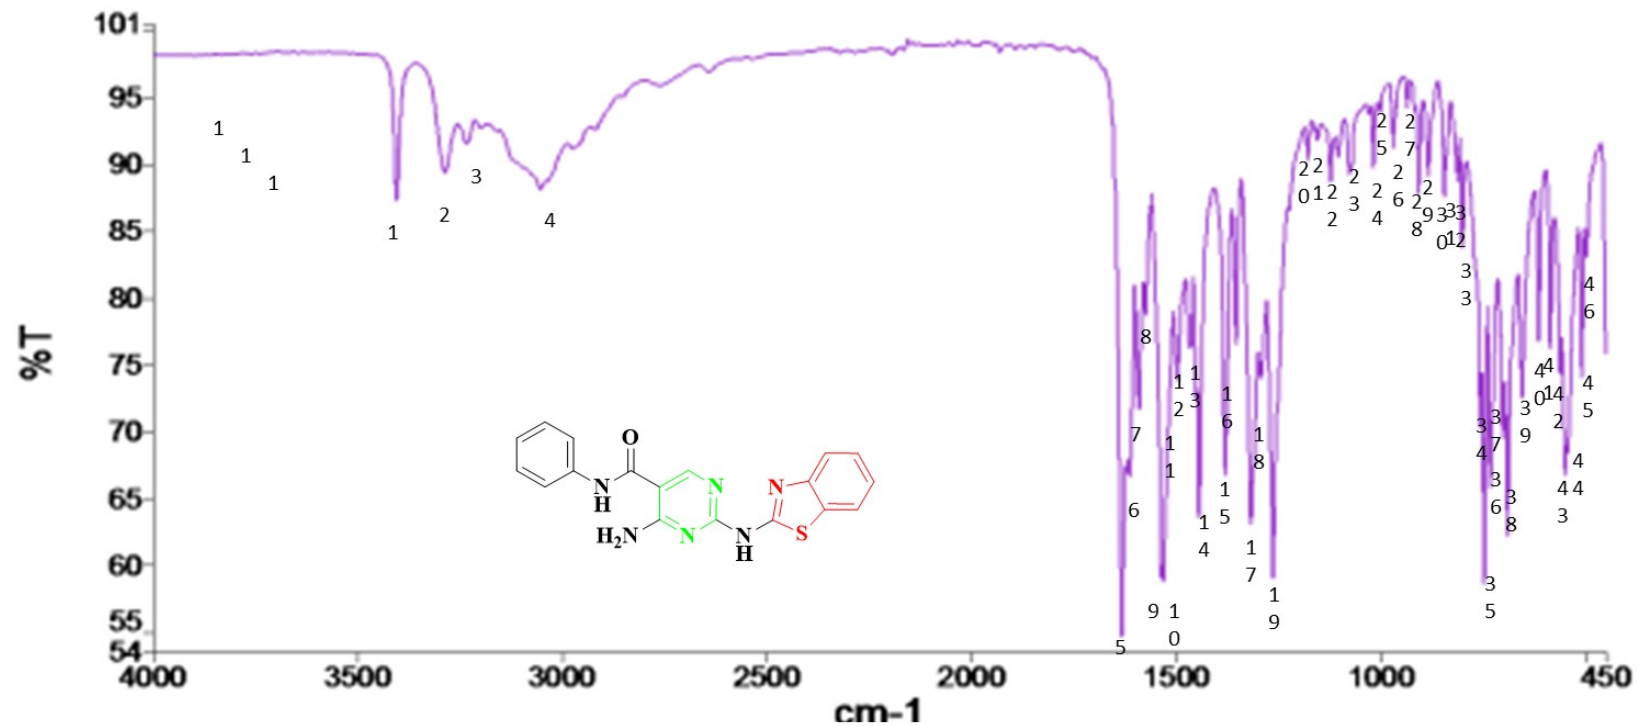

Figure 11. IR spectrum of compound 13a

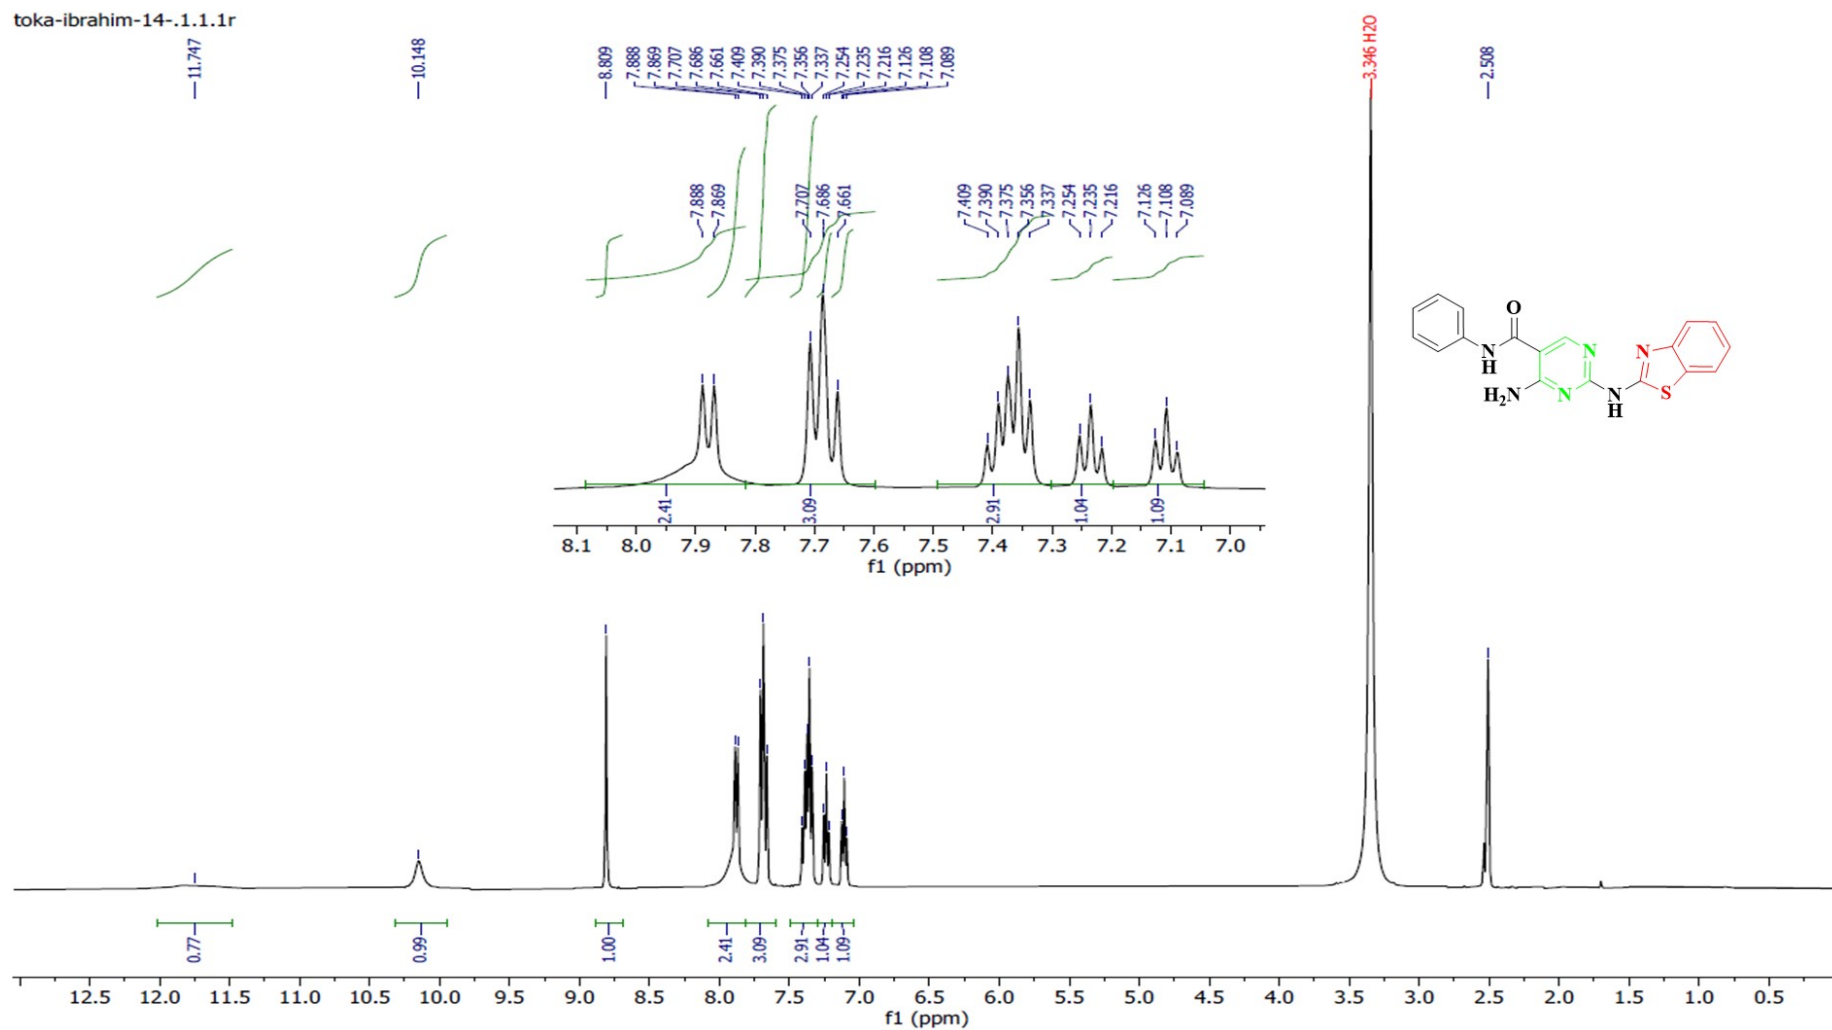

**Figure 12.** <sup>1</sup>H NMR spectrum of compound 13a

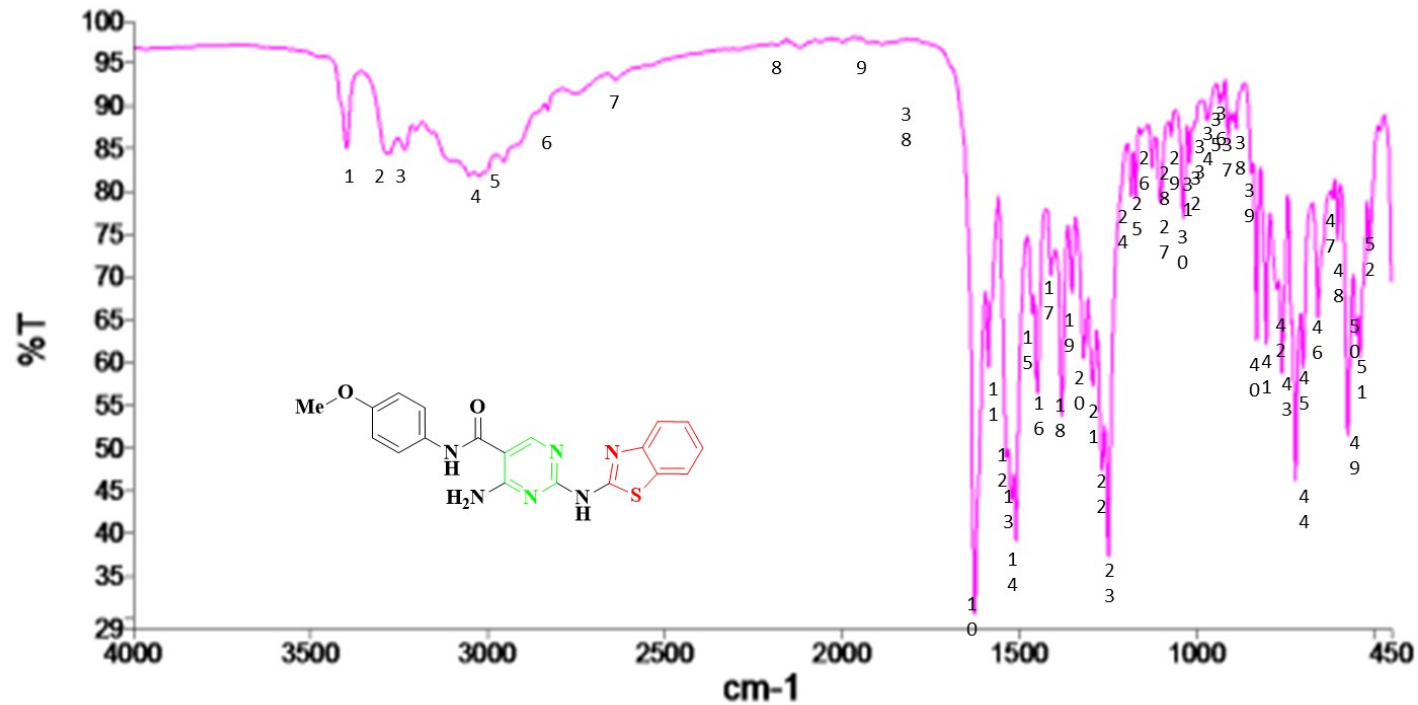

| No. | Position | Intinsty | No. | Position | Intinsty | No. | Position | Intinsty | No. | Position | Intinsty | No. | Position | Intinsty |
|-----|----------|----------|-----|----------|----------|-----|----------|----------|-----|----------|----------|-----|----------|----------|
| 1   | 3400.92  | 85.18    | 11  | 1588.03  | 59.44    | 21  | 1319.17  | 60.53    | 31  | 1037.27  | 76.96    | 41  | 802.98   | 62.13    |
| 2   | 3286.67  | 84.51    | 12  | 1537.43  | 48.83    | 22  | 1292.29  | 57.32    | 32  | 1019.63  | 83.39    | 42  | 772.75   | 68.56    |
| 3   | 3237.36  | 84.98    | 13  | 1523.18  | 43.84    | 23  | 1267.55  | 47.41    | 33  | 971.80   | 88.37    | 43  | 758.15   | 58.76    |
| 4   | 3027.44  | 81.85    | 14  | 1509.59  | 39.11    | 24  | 1249.18  | 37.28    | 34  | 934.25   | 90.35    | 44  | 719.85   | 46.17    |
| 5   | 2956.59  | 83.62    | 15  | 1463.80  | 65.69    | 25  | 1184.35  | 79.51    | 35  | 926.48   | 90.78    | 45  | 698.51   | 59.40    |
| 6   | 2833.06  | 89.60    | 16  | 1453.94  | 58.17    | 26  | 1171.05  | 79.36    | 36  | 910.91   | 85.79    | 46  | 657.47   | 65.31    |
| 7   | 2640.45  | 93.15    | 17  | 1448.16  | 56.44    | 27  | 1155.71  | 86.82    | 37  | 900.58   | 88.40    | 47  | 614.42   | 79.22    |
| 8   | 2117.04  | 96.98    | 18  | 1411.67  | 70.32    | 28  | 1125.89  | 82.85    | 38  | 888.72   | 87.48    | 48  | 600.79   | 74.38    |
| 9   | 1891.21  | 97.27    | 19  | 1380.27  | 53.71    | 29  | 1101.07  | 78.80    | 39  | 845.17   | 82.22    | 49  | 572.88   | 51.46    |
| 10  | 1626.60  | 30.49    | 20  | 1351.40  | 68.08    | 30  | 1071.20  | 86.49    | 40  | 830.15   | 62.66    | 50  | 549.22   | 63.19    |
| 51  | 538.20   | 60.57    | 52  | 510.46   | 73.05    |     |          |          |     |          |          |     |          |          |

**Figure 13.** IR spectrum of compound **13b**

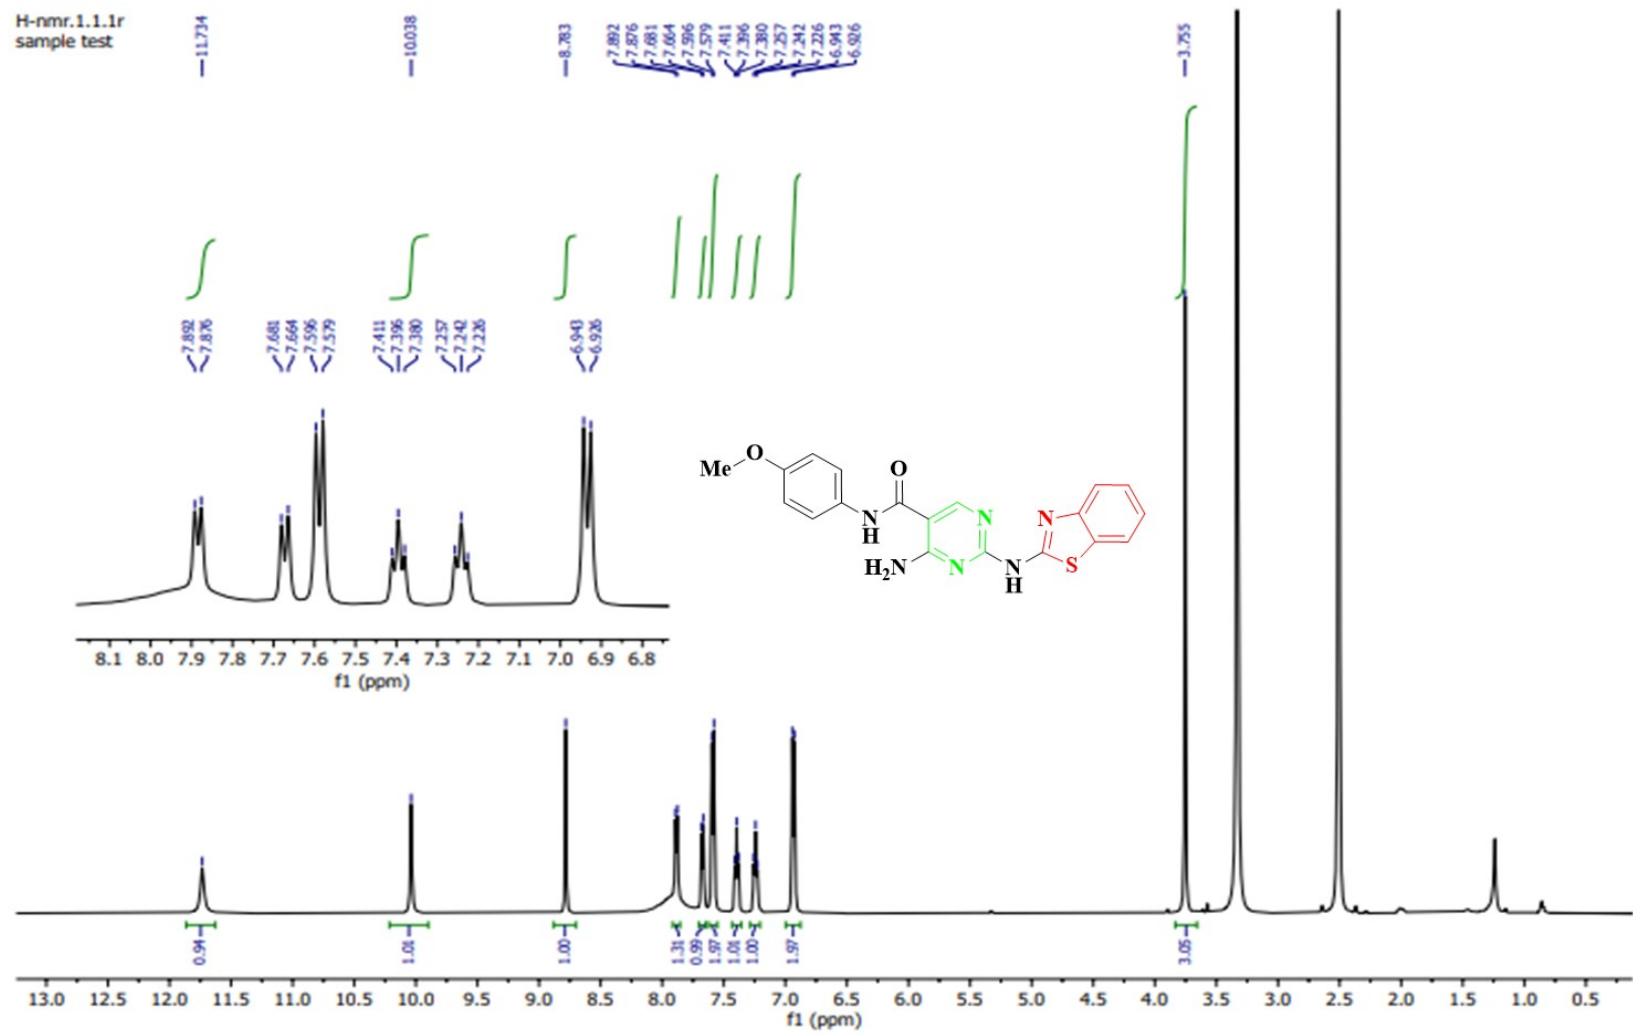

Figure 14.  $^1\text{H}$  NMR spectrum of compound 13b

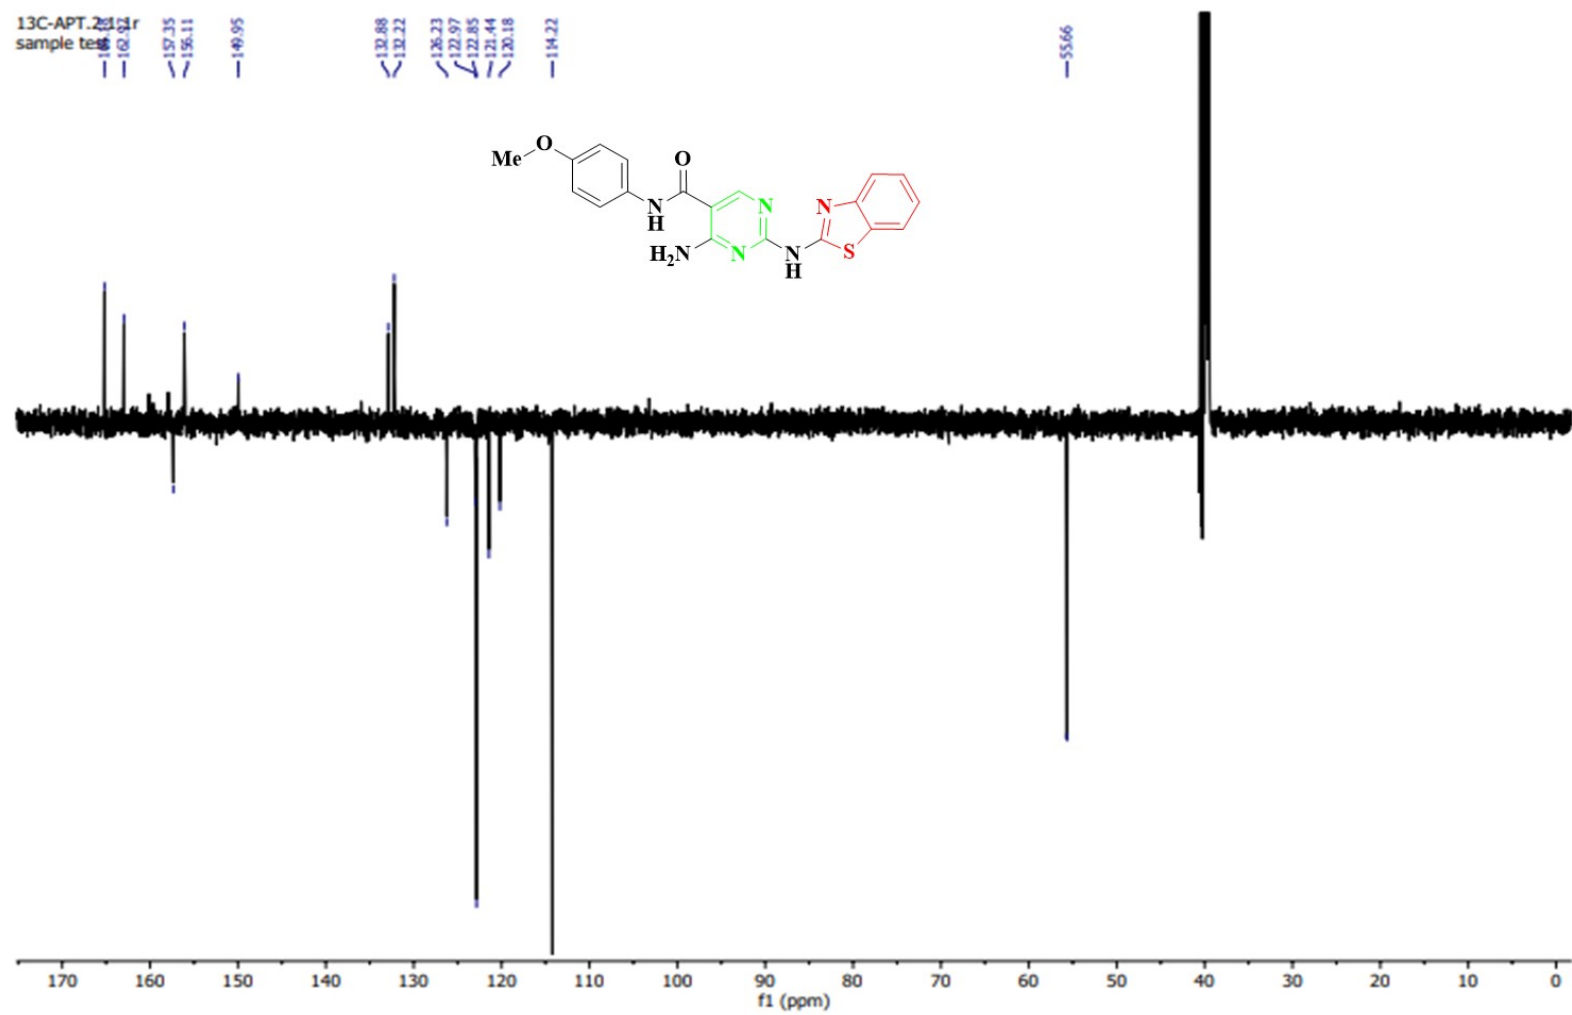

**Figure 15.**  $^{13}\text{C}$  NMR spectrum of compound **13b**



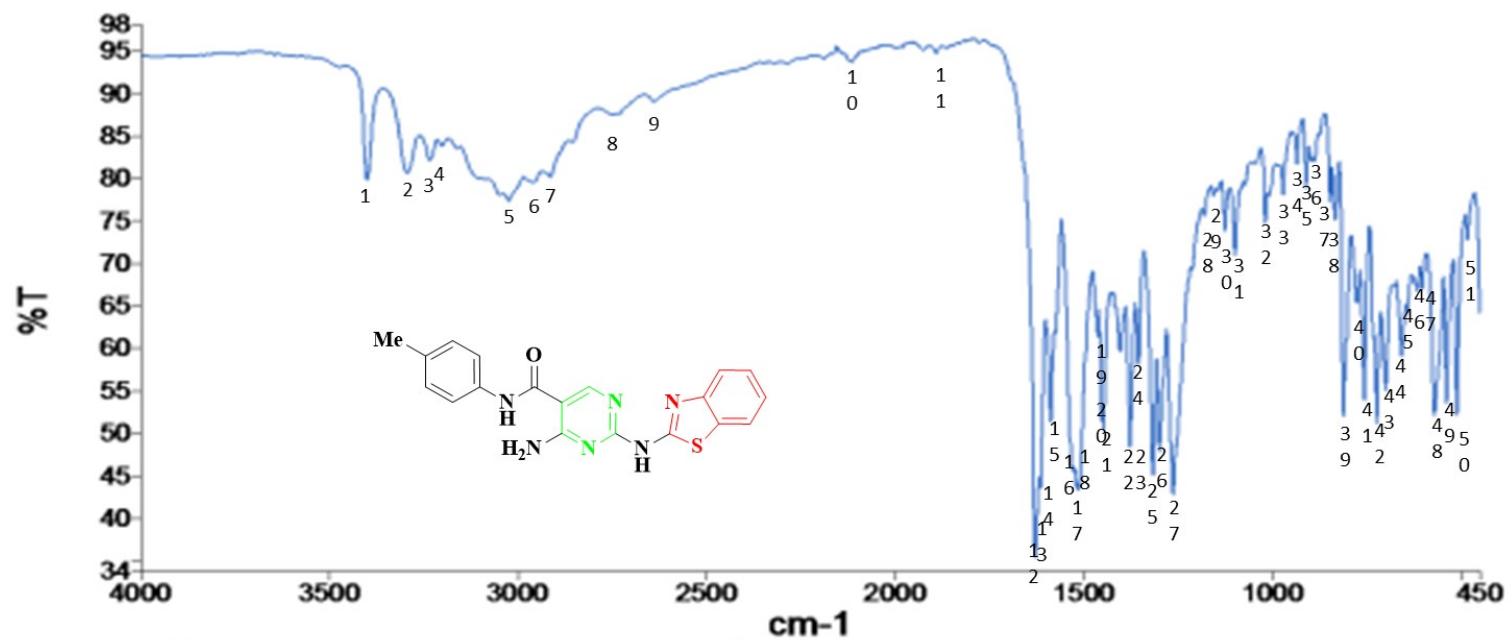

Figure 16. IR spectrum of compound 13c

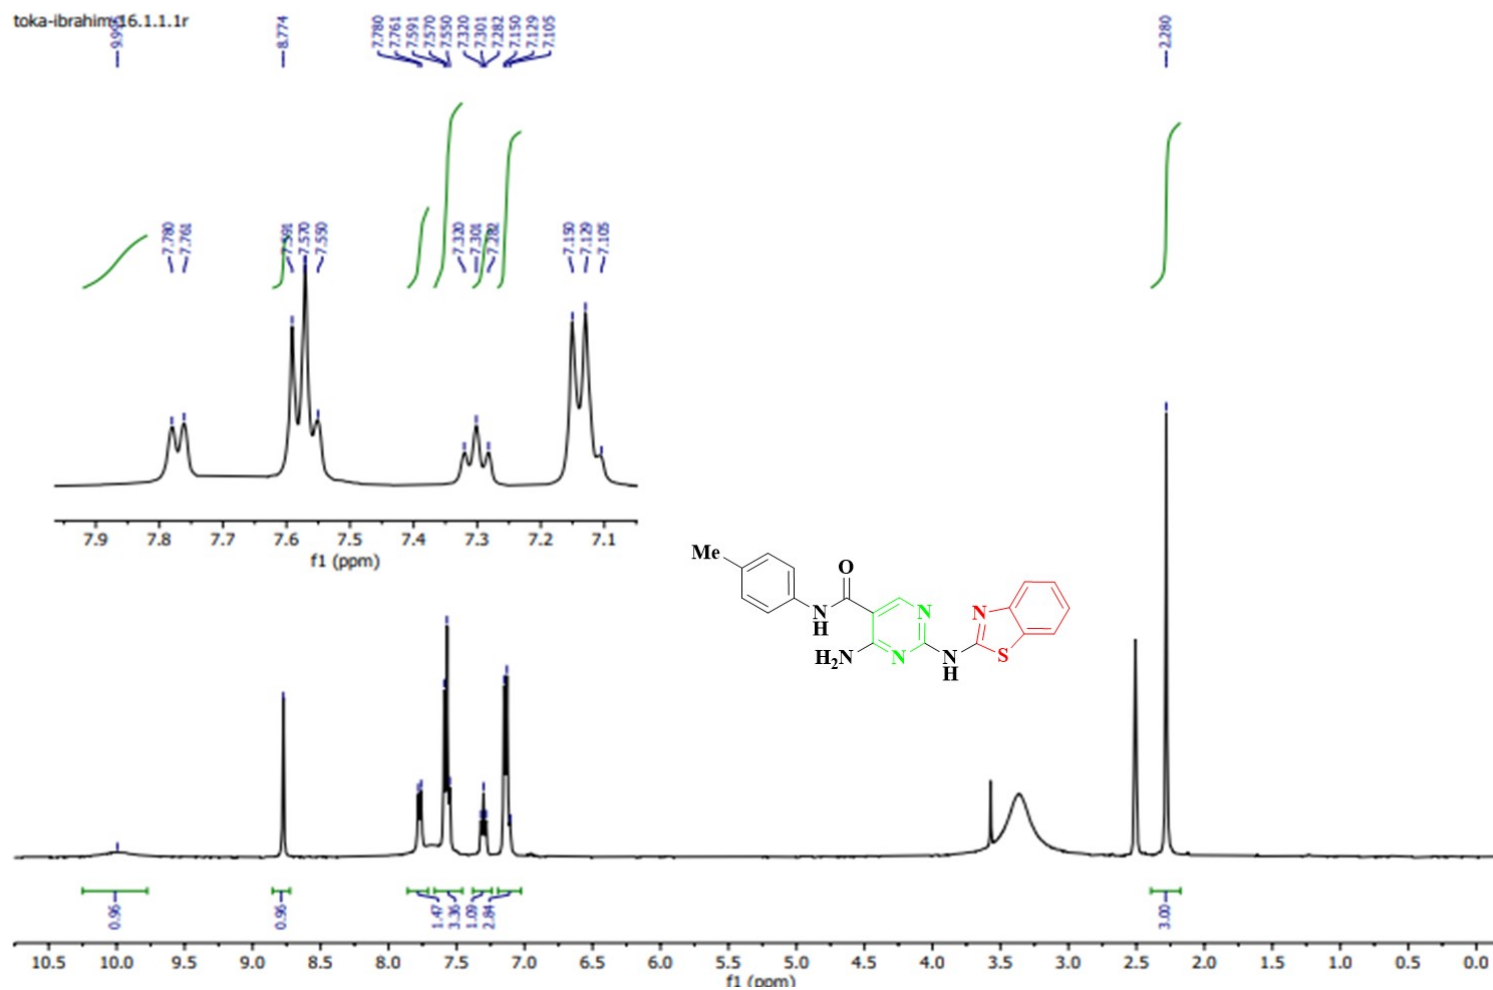

Figure 17.  $^1\text{H}$  NMR spectrum of compound 13c

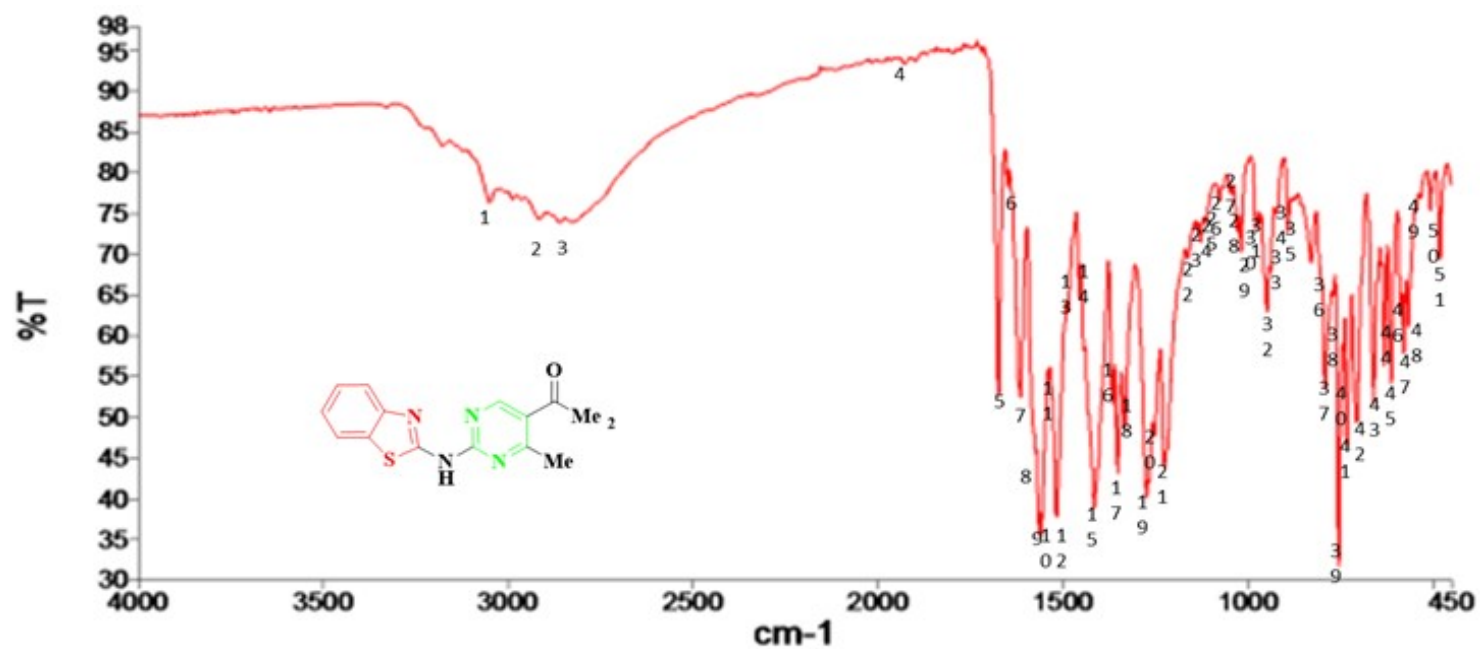

| No. | Position | Intinsty | No. | Position | Intinsty | No. | Position | Intinsty | No. | Position | Intinsty | No. | Position | Intinsty |
|-----|----------|----------|-----|----------|----------|-----|----------|----------|-----|----------|----------|-----|----------|----------|
| 1   | 3052.59  | 76.42    | 12  | 1518.71  | 37.79    | 22  | 1162.86  | 69.59    | 32  | 947.45   | 62.97    | 42  | 704.73   | 49.32    |
| 2   | 2917.76  | 74.35    | 13  | 1486.75  | 62.86    | 23  | 1137.29  | 73.15    | 33  | 938.45   | 67.80    | 43  | 658.79   | 51.60    |
| 3   | 2862.04  | 73.96    | 14  | 1456.01  | 64.51    | 24  | 1127.77  | 71.52    | 34  | 921.51   | 75.00    | 44  | 630.14   | 56.42    |
| 4   | 1928.75  | 93.48    | 15  | 1416.17  | 38.69    | 25  | 1114.82  | 73.71    | 35  | 891.45   | 72.83    | 45  | 611.52   | 54.12    |
| 5   | 1674.41  | 52.73    | 16  | 1366.82  | 51.5     | 26  | 1076.43  | 76.68    | 36  | 828.30   | 69.00    | 46  | 585.95   | 62.63    |
| 6   | 1650.37  | 78.49    | 17  | 1352.32  | 43.11    | 27  | 1046.18  | 77.44    | 37  | 790.57   | 53.44    | 47  | 577.82   | 57.86    |
| 7   | 1615.48  | 52.49    | 18  | 1333.49  | 48.61    | 28  | 1028.74  | 72.87    | 38  | 769.00   | 64.89    | 48  | 564.83   | 61.12    |
| 8   | 1574.19  | 45.55    | 19  | 1274.51  | 40.07    | 29  | 1017.55  | 70.36    | 39  | 753.74   | 31.69    | 49  | 531.88   | 76.98    |
| 9   | 1563.53  | 35.37    | 20  | 1252.42  | 47.70    | 30  | 978.36   | 73.05    | 40  | 742.02   | 58.21    | 50  | 506.24   | 75.48    |
| 10  | 1557.84  | 35.67    | 21  | 1226.41  | 43.93    | 31  | 966.01   | 73.89    | 41  | 731.07   | 46.48    | 51  | 479.90   | 69.31    |
| 11  | 1538.57  | 54.75    |     |          |          |     |          |          |     |          |          |     |          |          |

Figure 18. IR spectrum of compound 15a

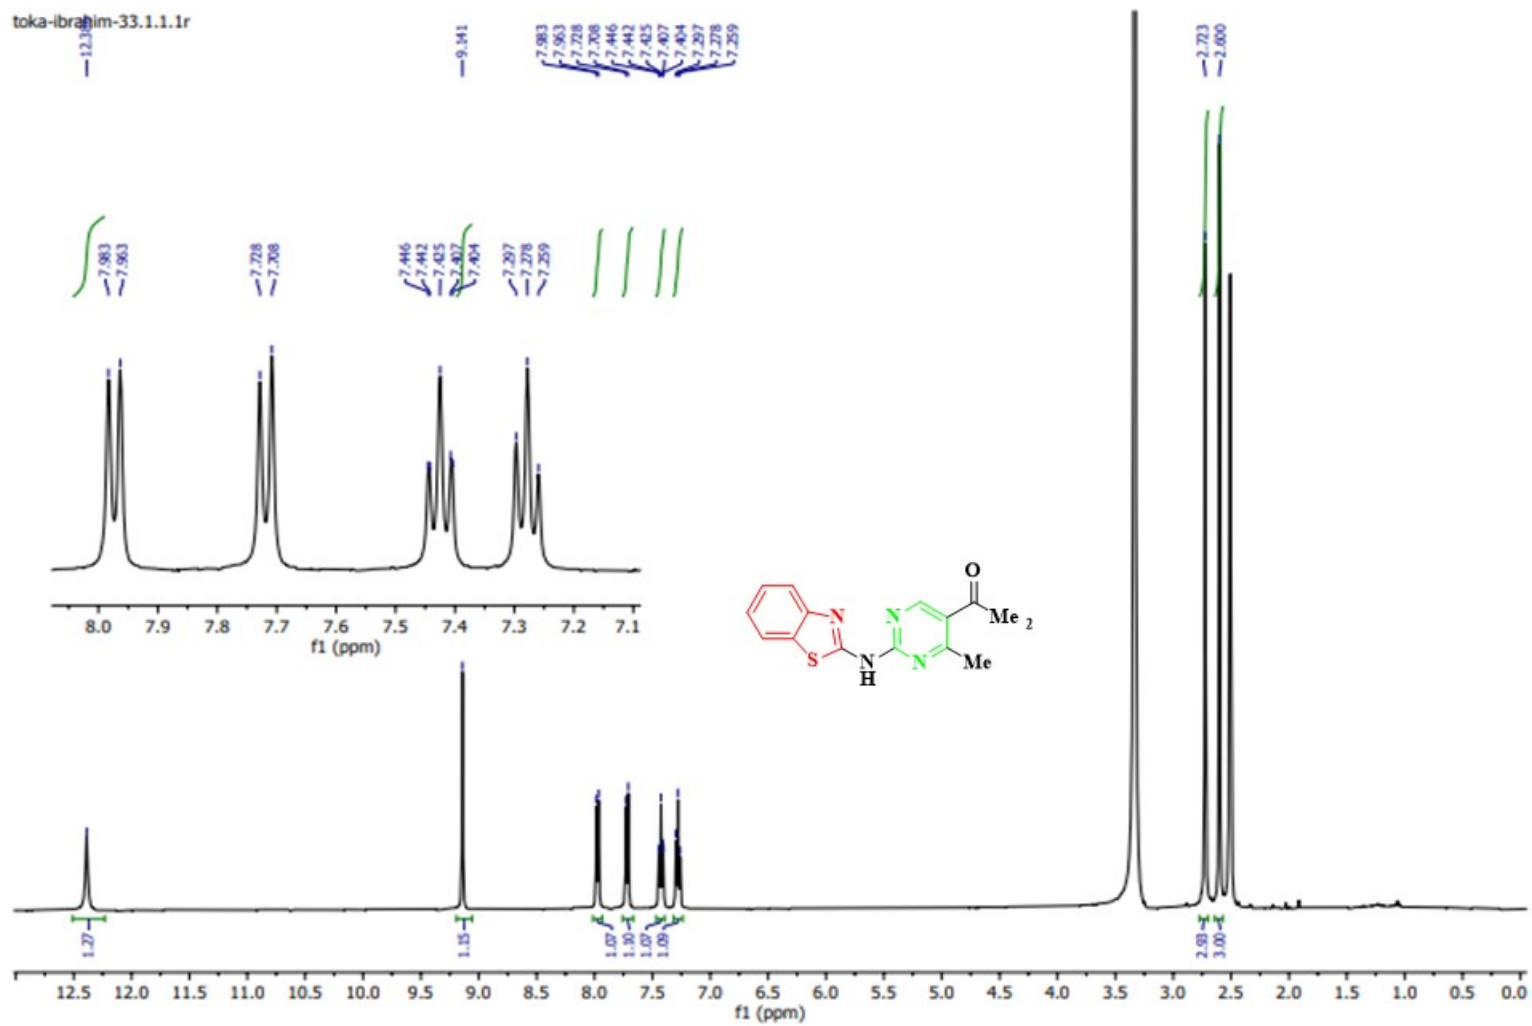

Figure 19.  $^1\text{H}$  NMR spectrum of compound 15a

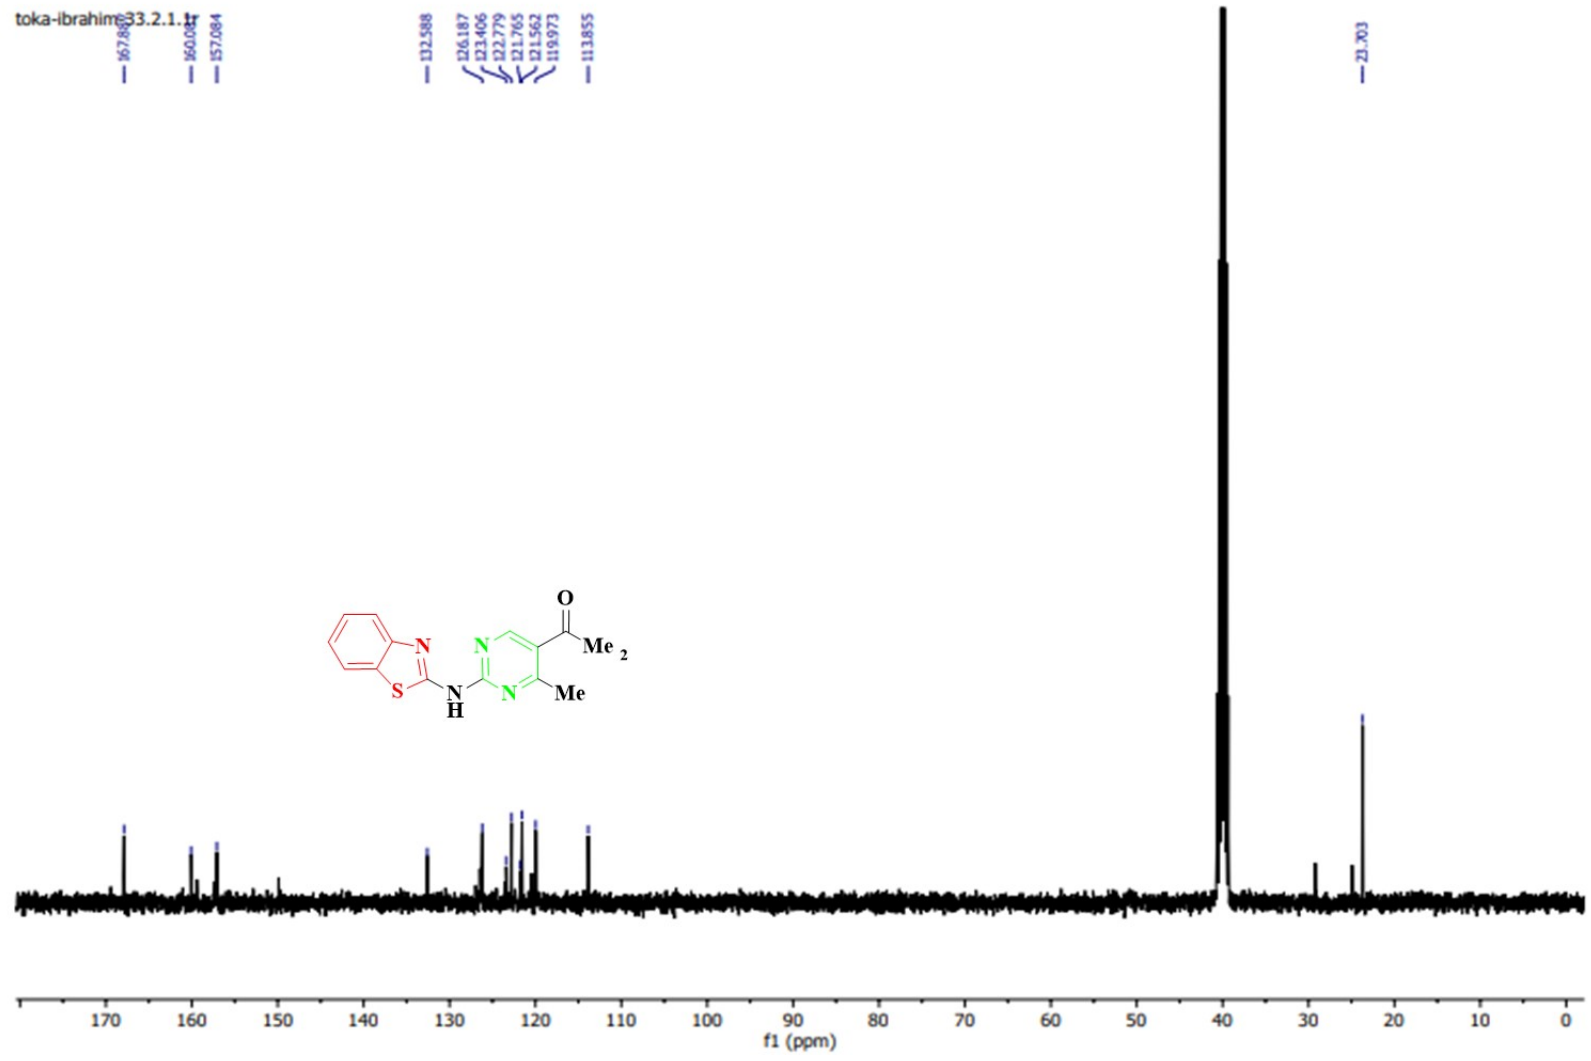

Figure 20.  $^{13}\text{C}$  NMR spectrum of compound 15a

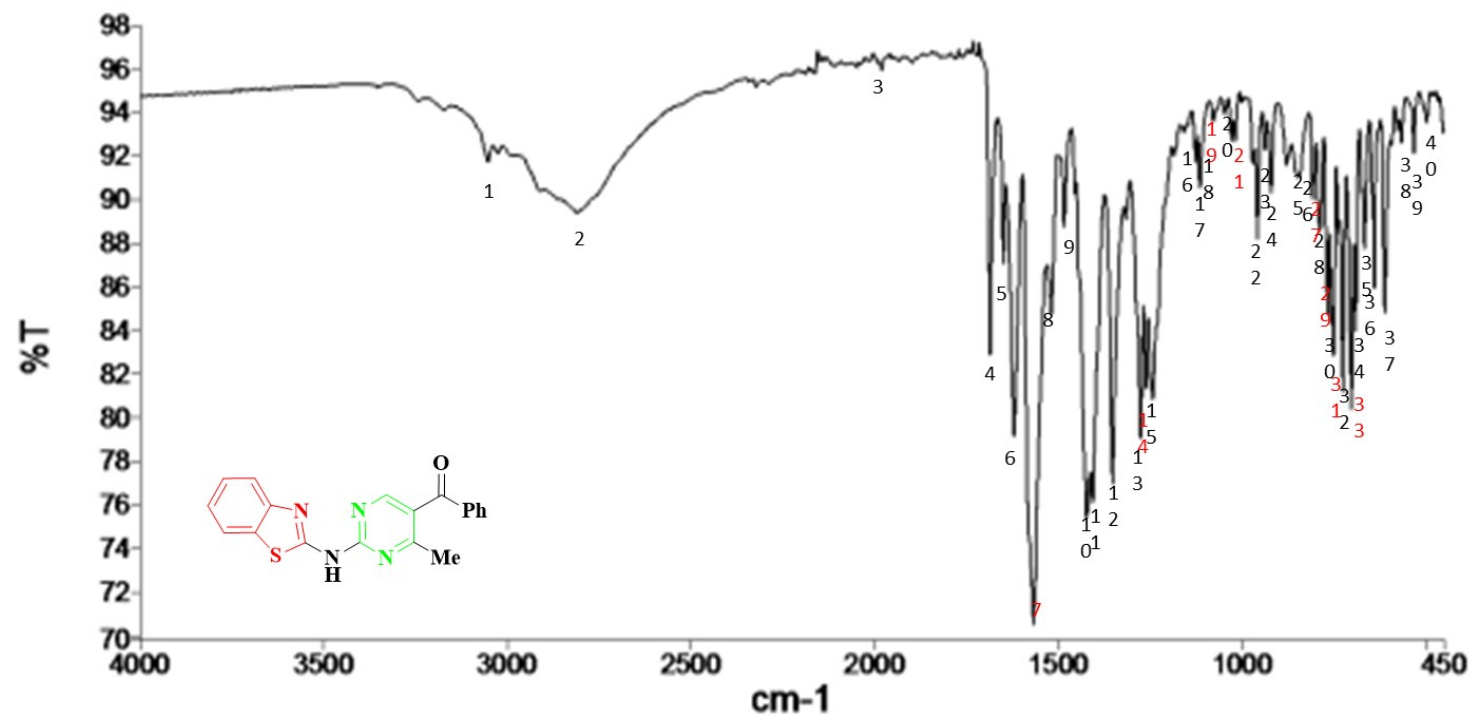

|     |          |          |     |          |          |     |          |          |     |          |          |     |          |          |
|-----|----------|----------|-----|----------|----------|-----|----------|----------|-----|----------|----------|-----|----------|----------|
| No. | Position | Intinsty | No. | Position | Intinsty | No. | Position | Intinsty | No. | Position | Intinsty | No. | Position | Intinsty |
| 1   | 3054.78  | 91.79    | 9   | 1484.15  | 88.76    | 17  | 1114.30  | 90.60    | 25  | 878.17   | 91.62    | 33  | 701.52   | 80.40    |
| 2   | 2811.04  | 89.44    | 10  | 1422.82  | 75.41    | 18  | 1077.68  | 93.64    | 26  | 847.00   | 91.06    | 34  | 689.70   | 84.00    |
| 3   | 1980.67  | 95.99    | 11  | 1406.97  | 76.10    | 19  | 1046.83  | 93.96    | 27  | 807.01   | 90.07    | 35  | 665.52   | 87.77    |
| 4   | 1686.17  | 82.91    | 12  | 1352.42  | 76.98    | 20  | 1028.13  | 92.75    | 28  | 787.92   | 88.58    | 36  | 638.50   | 85.97    |
| 5   | 1650.57  | 87.08    | 13  | 1275.43  | 79.05    | 21  | 1018.14  | 92.75    | 29  | 766.69   | 84.7     | 37  | 610.61   | 84.84    |
| 6   | 1620.92  | 79.16    | 14  | 1261.25  | 81.37    | 22  | 957.39   | 88.23    | 30  | 755.47   | 84.28    | 38  | 564.68   | 92.65    |
| 7   | 1567.70  | 70.48    | 15  | 1242.57  | 80.85    | 23  | 937.47   | 92.35    | 31  | 749.44   | 82.87    | 39  | 531.04   | 92.19    |
| 8   | 1519.09  | 84.77    | 16  | 1126.59  | 91.75    | 24  | 920.01   | 90.36    | 32  | 723.80   | 81.19    | 40  | 496.08   | 93.60    |

Figure 21. IR spectrum of compound 15b

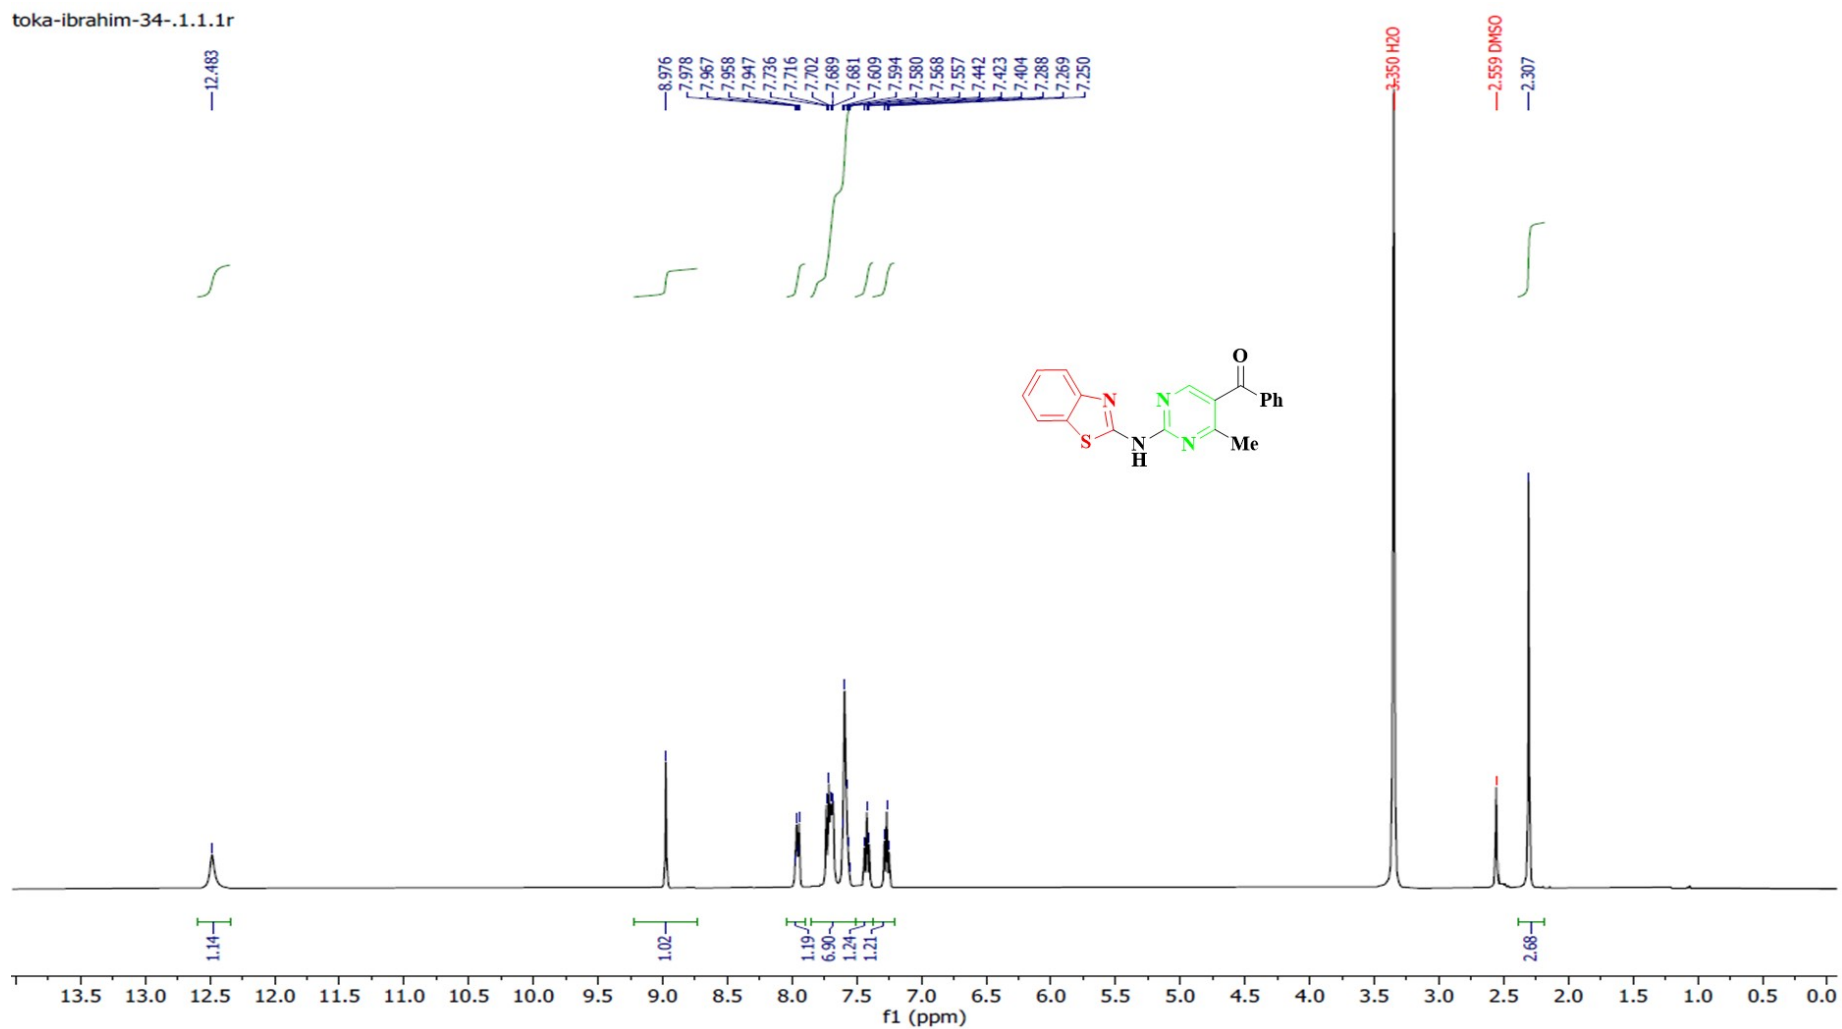

Figure 22. <sup>1</sup>H NMR spectrum of compound 15b

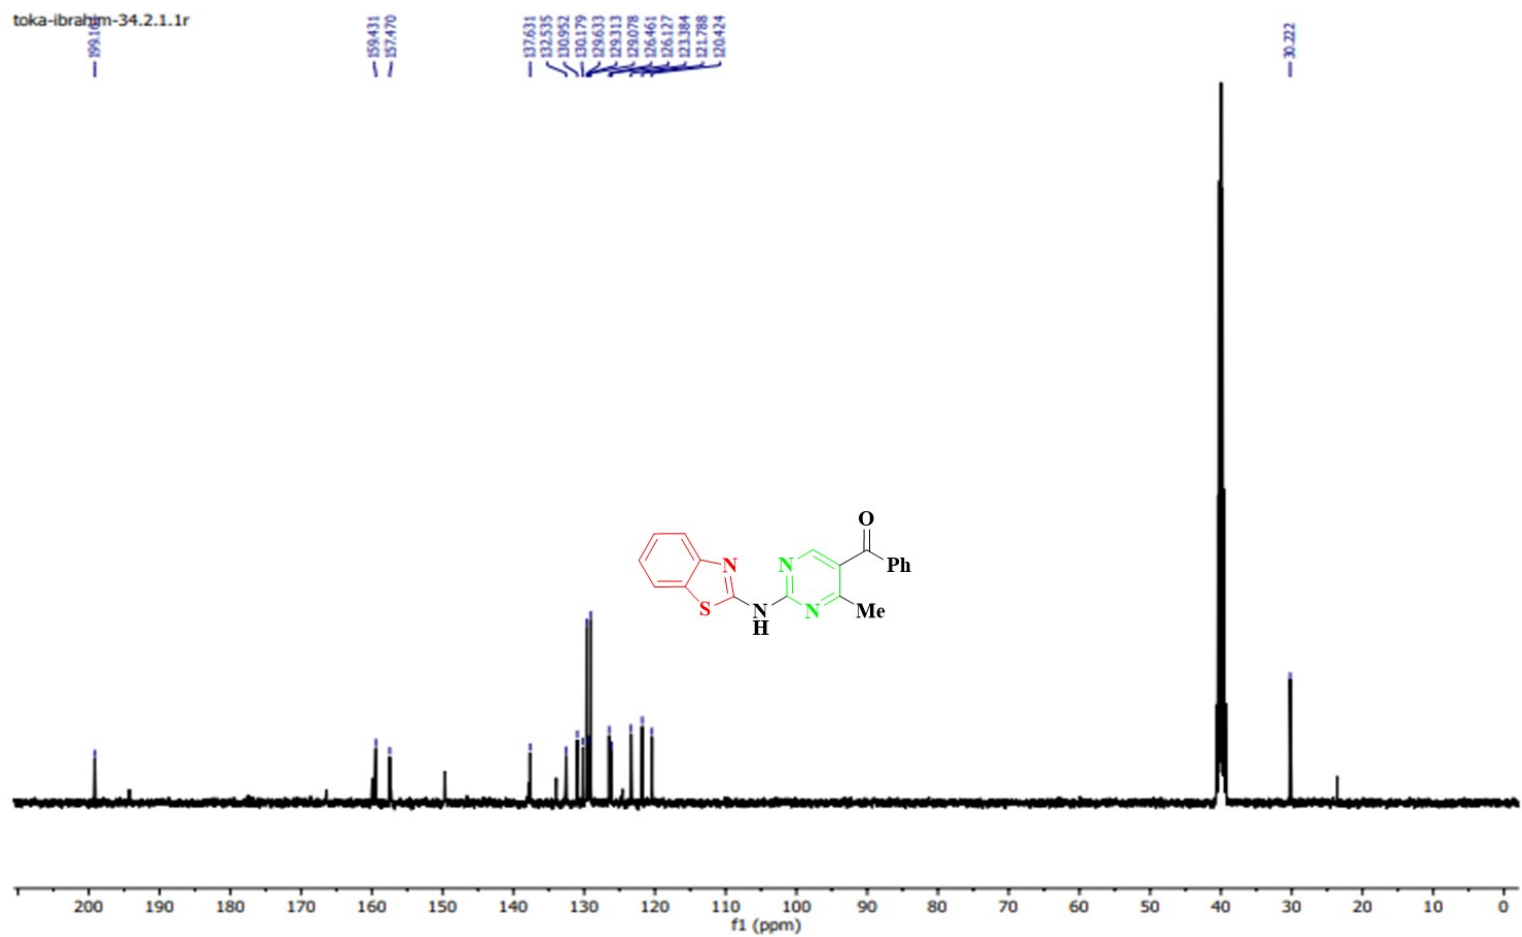

**Figure 23.**  $^{13}\text{C}$  NMR spectrum of compound **15b**



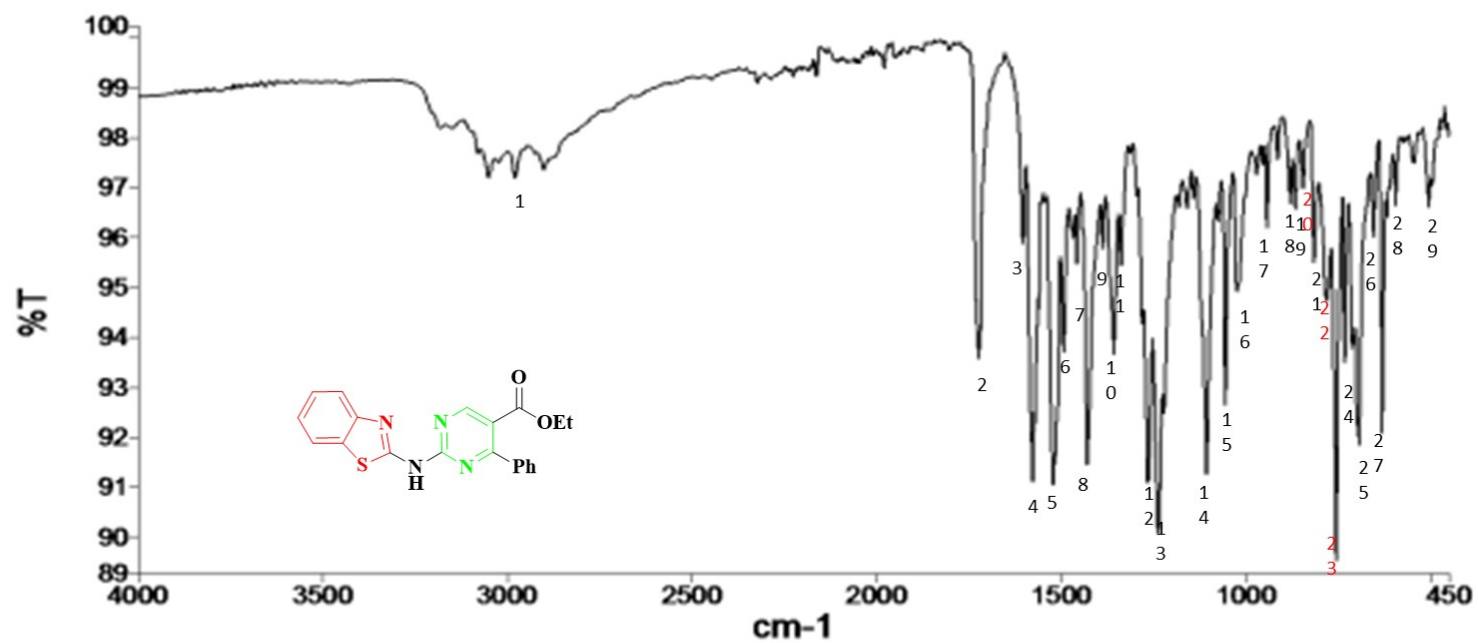

| No. | Position | Intinsty | No. | Position | Intinsty | No. | Position | Intinsty | No. | Position | Intinsty | No. | Position | Intinsty |
|-----|----------|----------|-----|----------|----------|-----|----------|----------|-----|----------|----------|-----|----------|----------|
| 1   | 2982.06  | 97.22    | 7   | 1458.11  | 95.49    | 13  | 1237.36  | 90.05    | 19  | 865.63   | 96.58    | 25  | 692.72   | 91.84    |
| 2   | 1724.28  | 93.58    | 8   | 1430.07  | 91.45    | 14  | 1106.45  | 91.26    | 20  | 845.10   | 97.00    | 26  | 653.52   | 96.02    |
| 3   | 1604.07  | 95.90    | 9   | 1388.35  | 95.79    | 15  | 1055.40  | 92.66    | 21  | 815.11   | 95.51    | 27  | 630.36   | 92.08    |
| 4   | 1578.00  | 91.12    | 10  | 1357.88  | 93.66    | 16  | 1024.89  | 94.93    | 22  | 781.69   | 94.74    | 28  | 593.60   | 96.66    |
| 5   | 1522.63  | 91.04    | 11  | 1338.64  | 95.45    | 17  | 942.42   | 96.21    | 23  | 755.24   | 89.53    | 29  | 504.23   | 96.63    |
| 6   | 1493.47  | 93.71    | 12  | 1265.57  | 91.07    | 18  | 880.38   | 96.70    | 24  | 731.96   | 93.50    |     |          |          |

Figure 24. IR spectrum of compound 15c

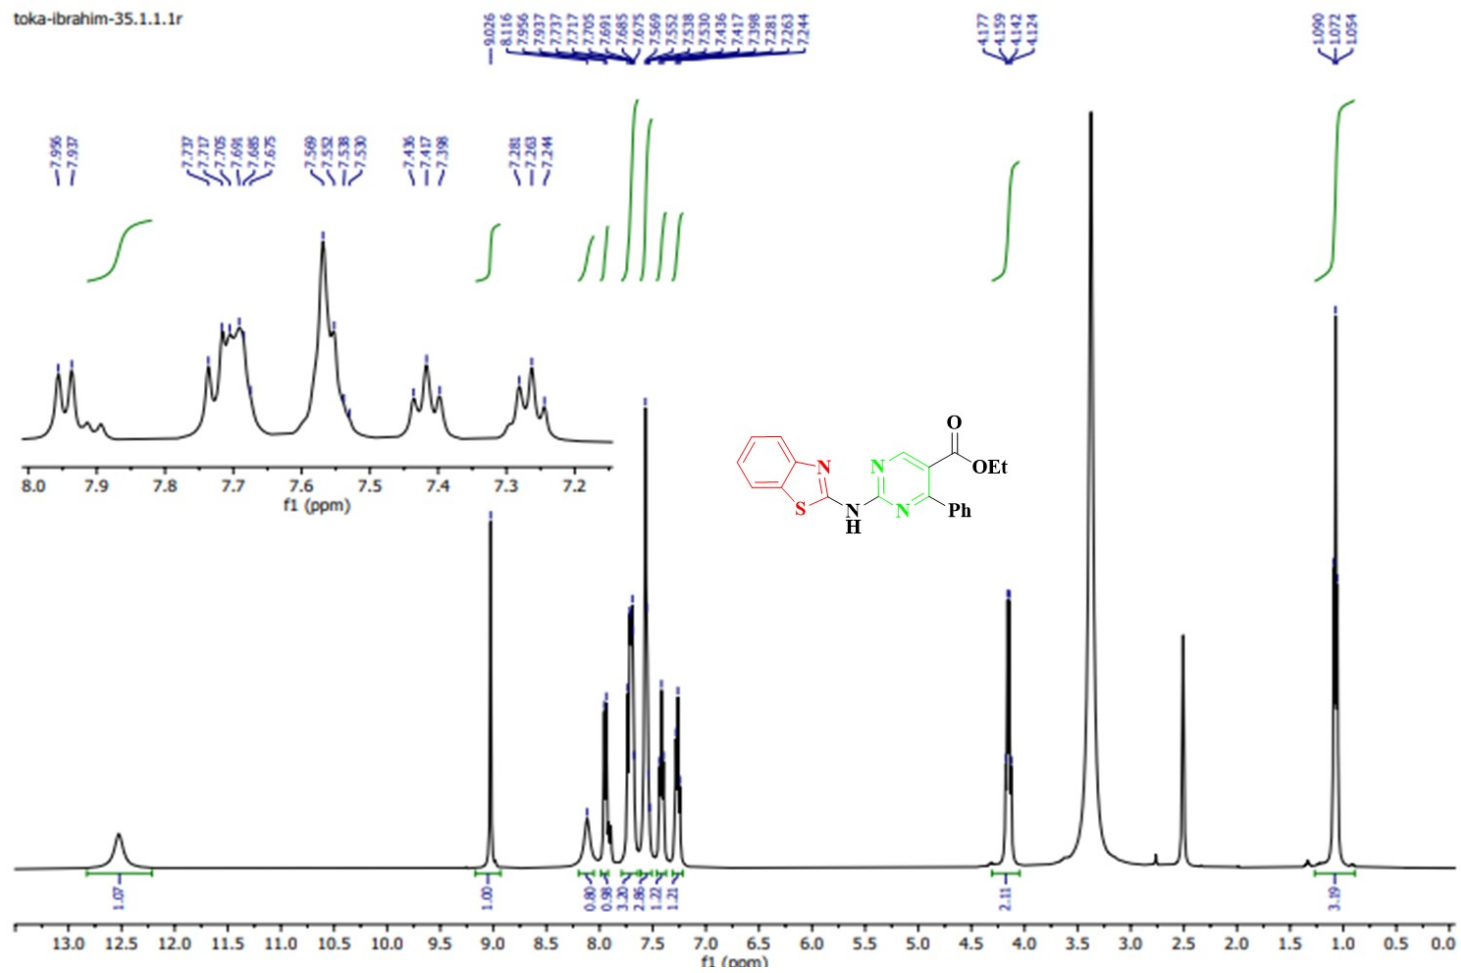

**Figure 25.**  $^1\text{H}$  NMR spectrum of compound 15c

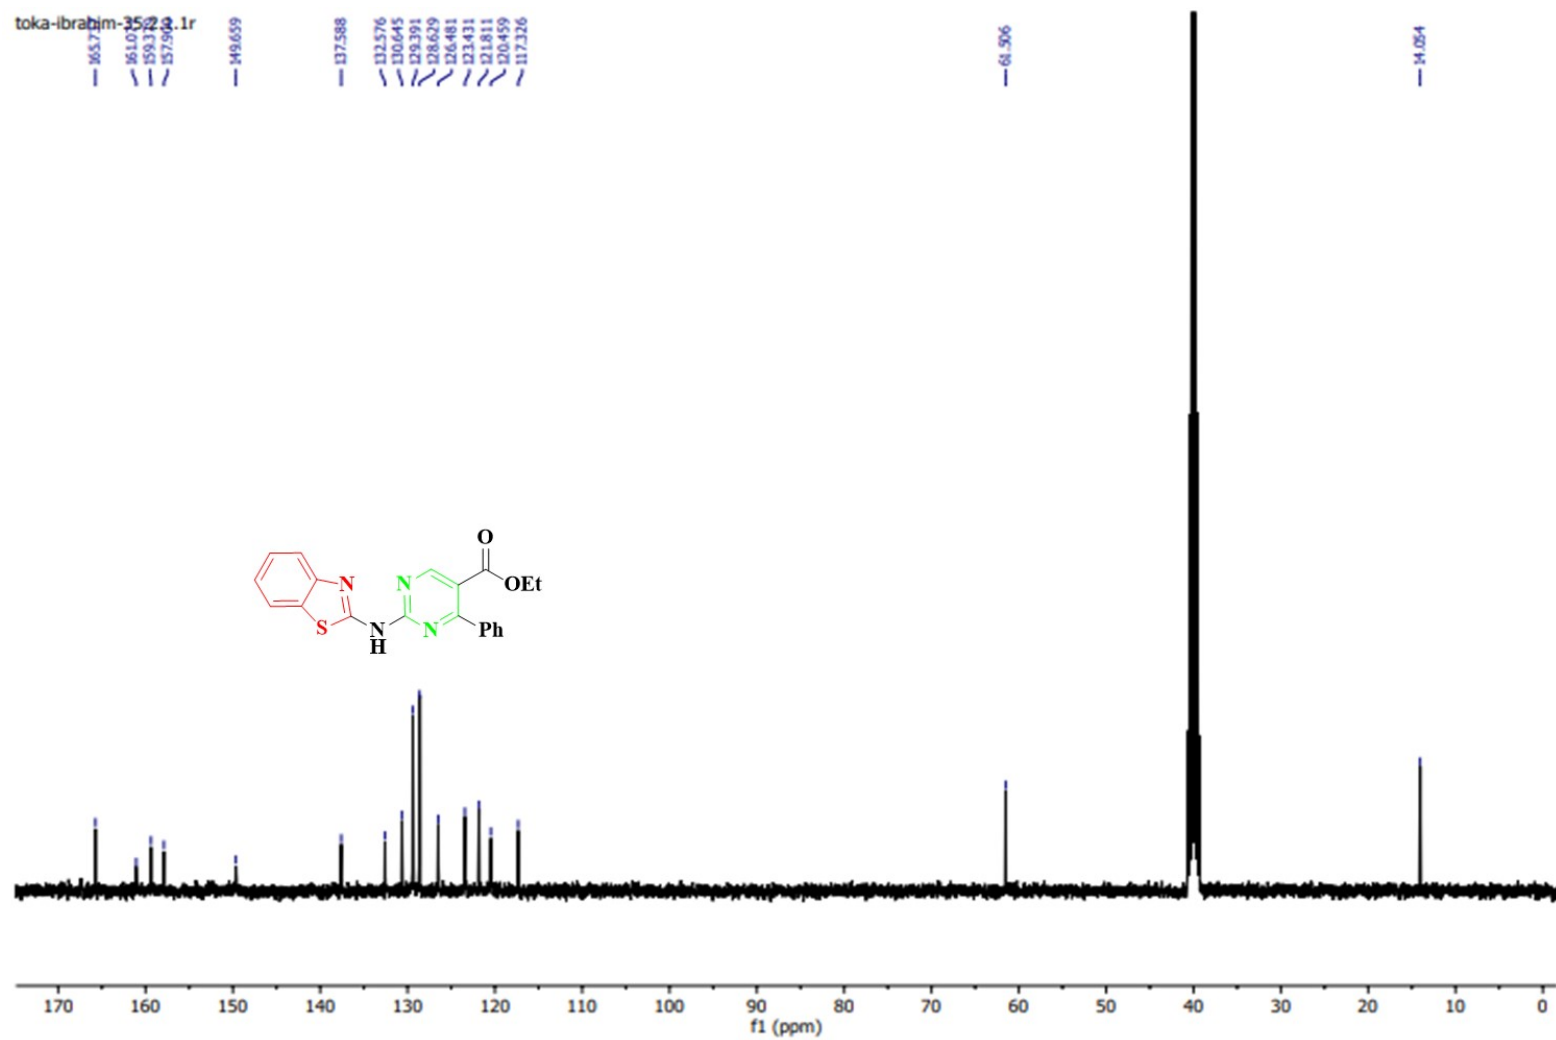

Figure 26.  $^{13}\text{C}$  NMR spectrum of compound 15c

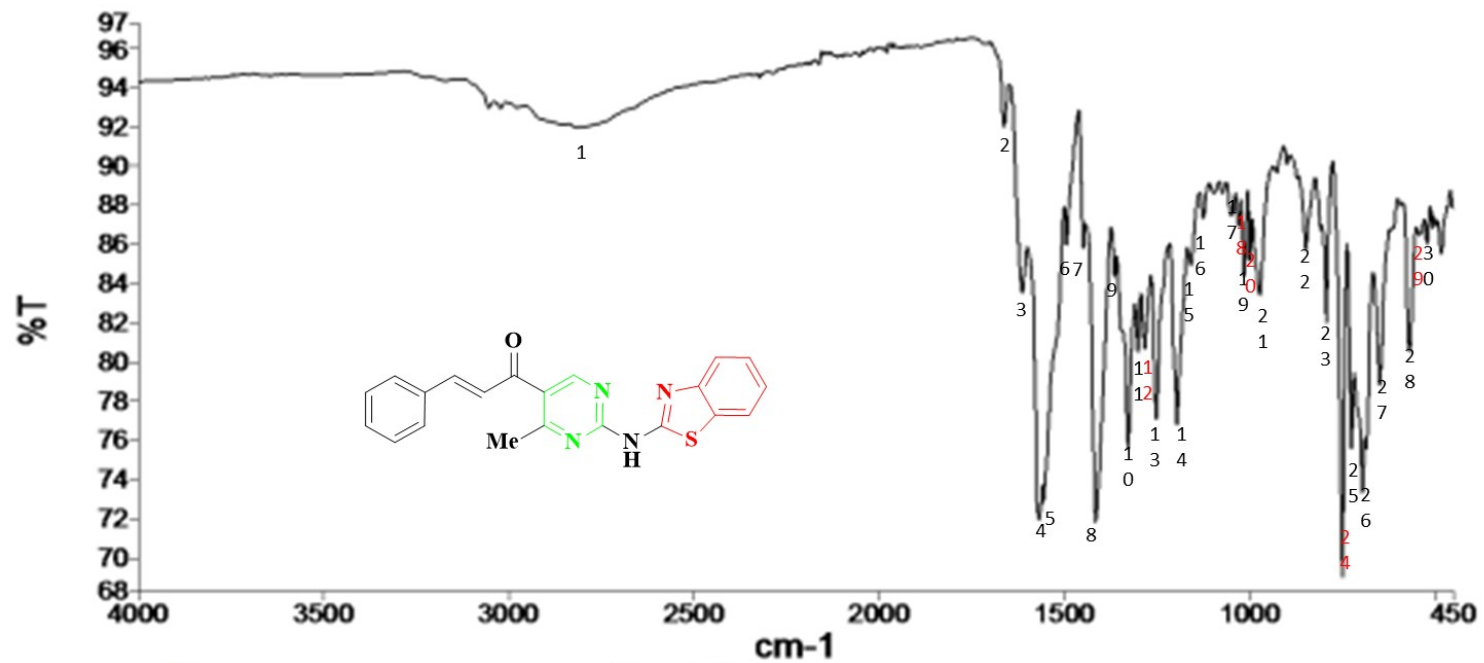

| No. | Position | Intensity | No. | Position | Intensity | No. | Position | Intensity | No. | Position | Intensity | No. | Position | Intensity |
|-----|----------|-----------|-----|----------|-----------|-----|----------|-----------|-----|----------|-----------|-----|----------|-----------|
| 1   | 2815.22  | 92.01     | 7   | 1448.55  | 85.81     | 13  | 1251.91  | 77.12     | 19  | 1014.00  | 84.4      | 25  | 724.48   | 75.57     |
| 2   | 1663.16  | 92.02     | 8   | 1415.78  | 71.80     | 14  | 1195.96  | 76.81     | 20  | 998.79   | 85.19     | 26  | 694.12   | 73.30     |
| 3   | 1614.67  | 83.53     | 9   | 1364.22  | 84.37     | 15  | 1158.13  | 84.94     | 21  | 972.34   | 83.44     | 27  | 647.81   | 78.86     |
| 4   | 1568.04  | 71.92     | 10  | 1327.77  | 75.59     | 16  | 1124.63  | 87.34     | 22  | 847.79   | 85.73     | 28  | 567.88   | 80.54     |
| 5   | 1557.63  | 72.83     | 11  | 1301.31  | 80.52     | 17  | 1048.97  | 87.49     | 23  | 791.87   | 82.03     | 29  | 519.54   | 86.06     |
| 6   | 1494.42  | 86.01     | 12  | 1282.87  | 80.69     | 18  | 1029.50  | 86.99     | 24  | 748.68   | 69.00     | 30  | 481.66   | 85.54     |

**Figure 27.** IR spectrum of compound 17a



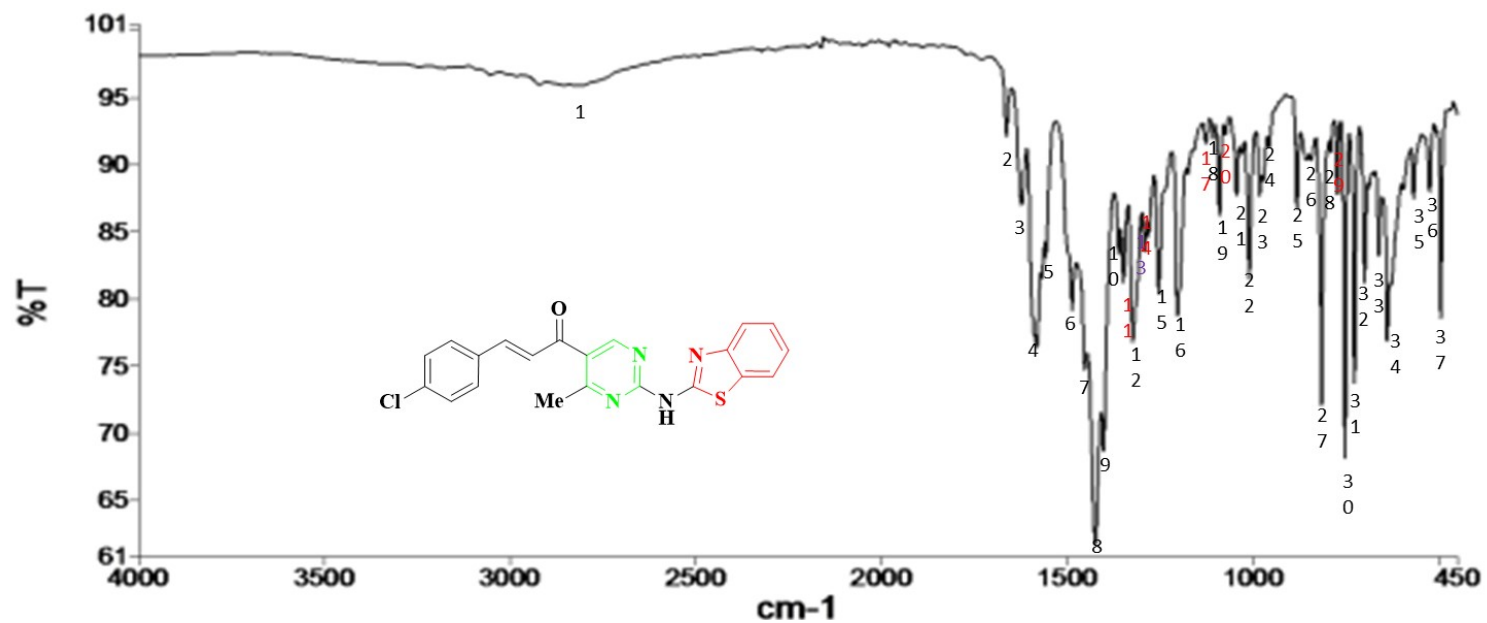

| No. | Position | Intinsty | No. | Position | Intinsty | No. | Position | Intinsty | No. | Position | Intinsty | No. | Position | Intinsty |
|-----|----------|----------|-----|----------|----------|-----|----------|----------|-----|----------|----------|-----|----------|----------|
| 1   | 2826.67  | 95.96    | 9   | 1402.05  | 68.66    | 17  | 1126.94  | 91.63    | 25  | 880.53   | 86.78    | 33  | 660.10   | 83.23    |
| 2   | 1663.83  | 92.17    | 10  | 1360.87  | 83.34    | 18  | 1107.45  | 92.03    | 26  | 843.20   | 90.33    | 34  | 637.69   | 76.86    |
| 3   | 1623.04  | 87.02    | 11  | 1348.09  | 81.27    | 19  | 1089.80  | 86.25    | 27  | 814.64   | 72.08    | 35  | 566.31   | 87.54    |
| 4   | 1582.01  | 76.40    | 12  | 1322.96  | 76.78    | 20  | 1073.43  | 92.33    | 28  | 789.30   | 90.97    | 36  | 523.01   | 88.02    |
| 5   | 1557.63  | 83.12    | 13  | 1291.24  | 83.57    | 21  | 1043.57  | 87.76    | 29  | 771.90   | 87.81    | 37  | 492.87   | 78.62    |
| 6   | 1487.39  | 79.19    | 14  | 1280.86  | 84.64    | 22  | 1009.27  | 81.55    | 30  | 751.29   | 68.09    |     |          |          |
| 7   | 1452.36  | 74.69    | 15  | 1253.42  | 80.41    | 23  | 980.96   | 87.71    | 31  | 725.94   | 73.75    |     |          |          |
| 8   | 1424.44  | 61.74    | 16  | 1203.05  | 78.75    | 24  | 956.21   | 91.40    | 32  | 698.27   | 81.26    |     |          |          |

Figure 29. IR spectrum of compound 17b

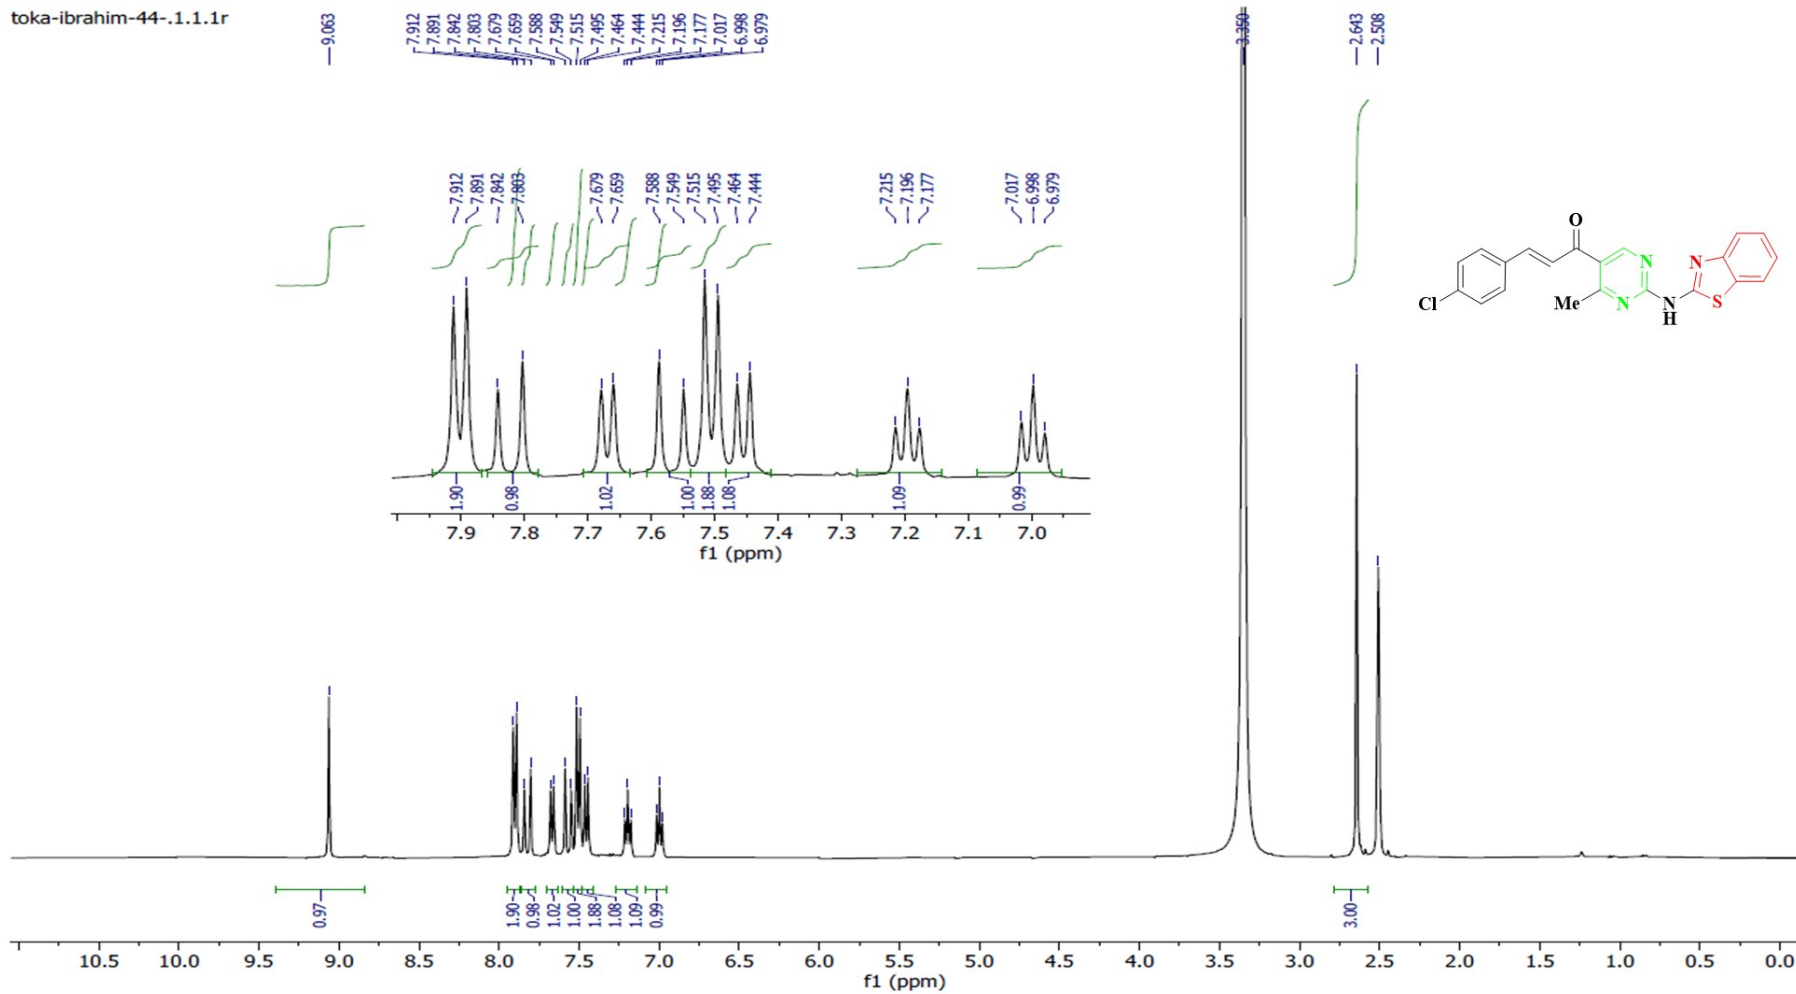

Figure 30. <sup>1</sup>H NMR spectrum of compound 17b

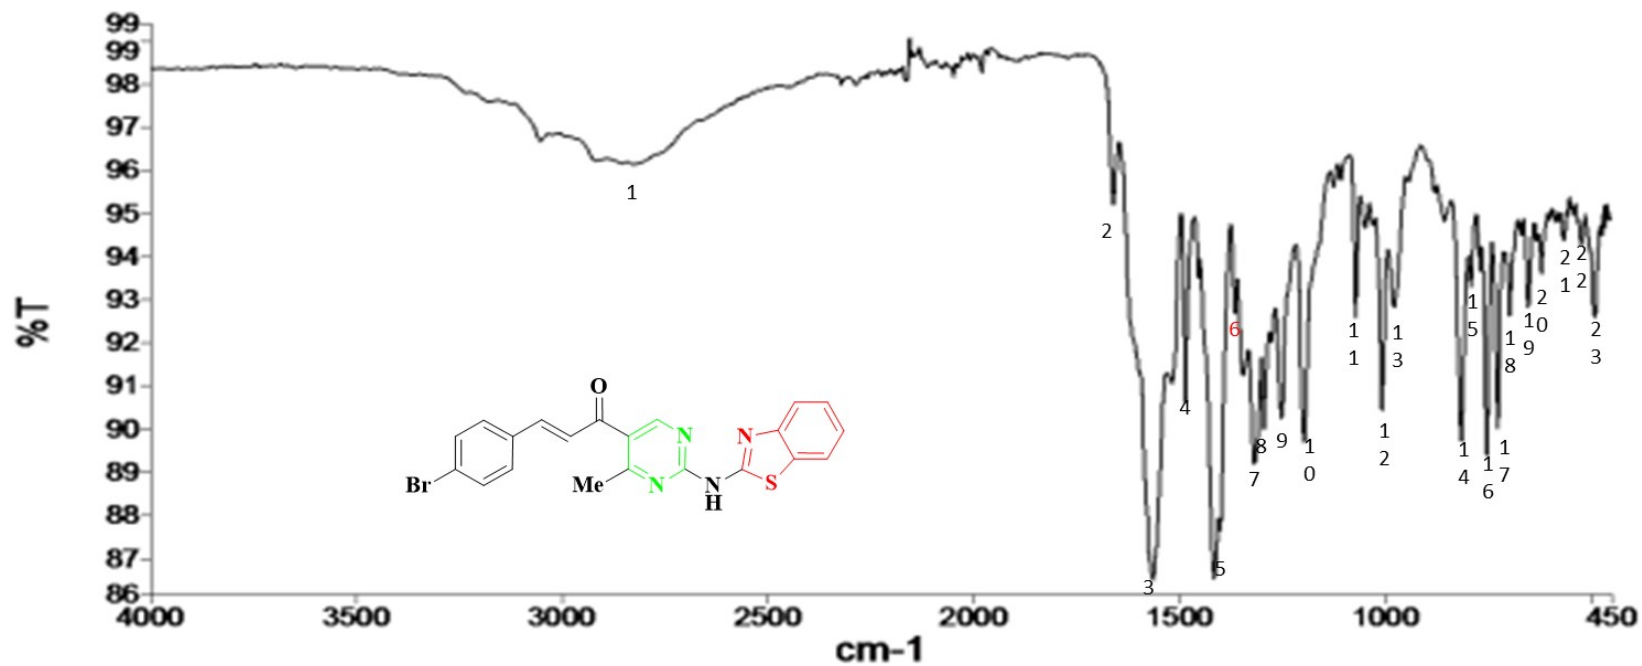

| No. | Position | Intinsty | No. | Position | Intinsty | No. | Position | Intinsty | No. | Position | Intinsty | No. | Position | Intinsty |
|-----|----------|----------|-----|----------|----------|-----|----------|----------|-----|----------|----------|-----|----------|----------|
| 1   | 2825.11  | 96.16    | 6   | 1365.56  | 92.68    | 11  | 1071.41  | 92.60    | 16  | 752.79   | 89.37    | 21  | 565.62   | 94.38    |
| 2   | 1661.31  | 95.21    | 7   | 1318.46  | 89.19    | 12  | 1007.53  | 90.43    | 17  | 725.91   | 90.02    | 22  | 522.86   | 94.25    |
| 3   | 1563.61  | 86.48    | 8   | 1294.59  | 90.00    | 13  | 978.51   | 92.83    | 18  | 696.85   | 92.64    | 23  | 489.21   | 92.59    |
| 4   | 1486.12  | 90.61    | 9   | 1252.14  | 90.24    | 14  | 814.07   | 89.71    | 19  | 651.68   | 92.82    |     |          |          |
| 5   | 1416.25  | 86.50    | 10  | 1196.33  | 89.70    | 15  | 791.22   | 93.30    | 20  | 619.33   | 93.61    |     |          |          |

**Figure 31.** IR spectrum of compound 17c



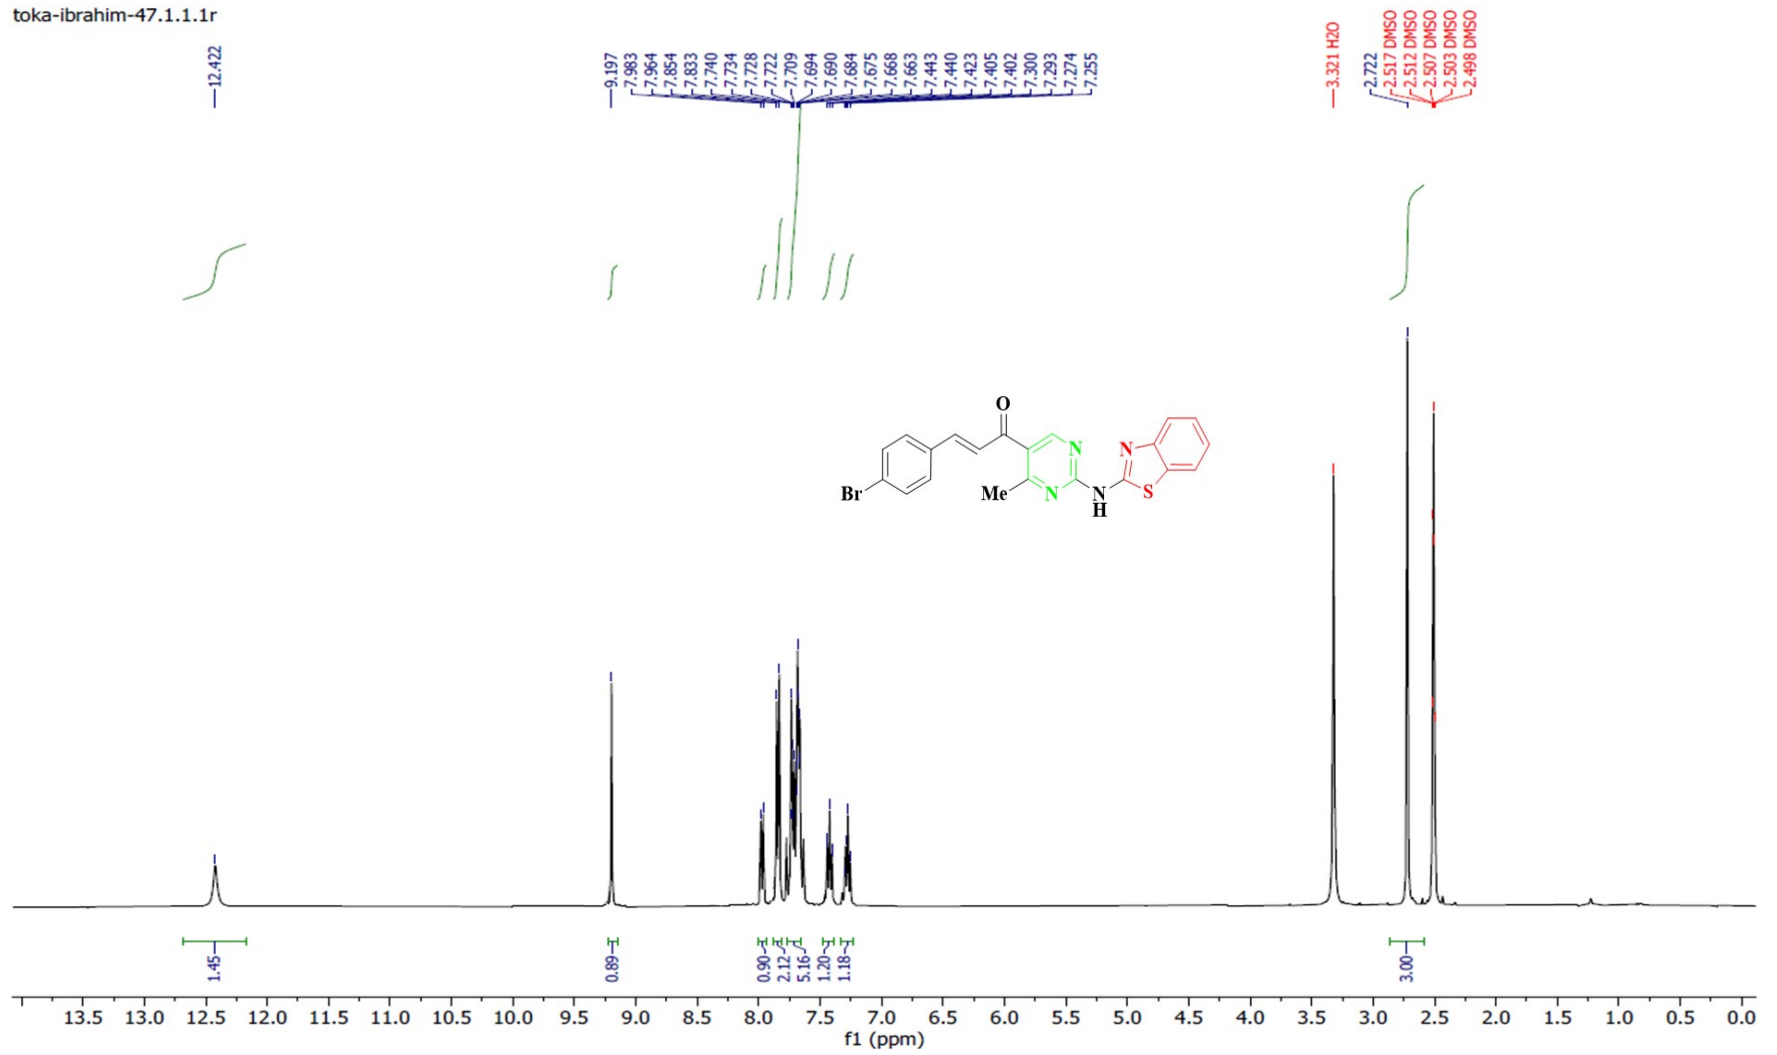

Figure 32. <sup>1</sup>H NMR spectrum of compound 17c

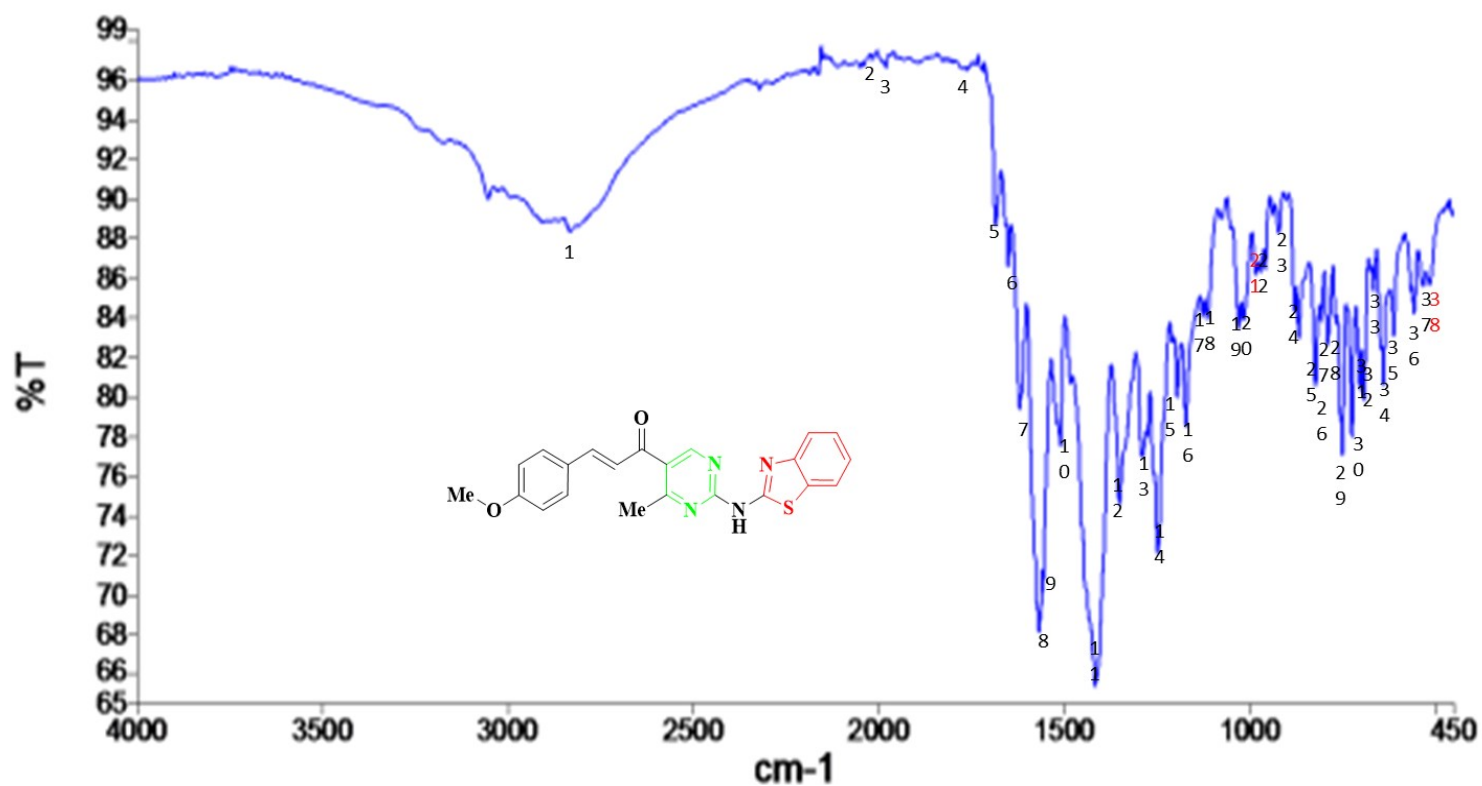

| No. | Position | Intinsty | No. | Position | Intinsty | No. | Position | Intinsty | No. | Position | Intinsty | No. | Position | Intinsty |
|-----|----------|----------|-----|----------|----------|-----|----------|----------|-----|----------|----------|-----|----------|----------|
| 1   | 2834.31  | 88.38    | 9   | 1558.00  | 70.13    | 17  | 1126.94  | 84.08    | 25  | 866.68   | 83.05    | 33  | 666.12   | 85.40    |
| 2   | 2050.95  | 96.71    | 10  | 1511.04  | 77.51    | 18  | 1113.82  | 83.97    | 26  | 822.06   | 80.58    | 34  | 638.76   | 80.63    |
| 3   | 1981.14  | 96.71    | 11  | 1416.71  | 65.32    | 19  | 1028.84  | 83.53    | 27  | 807.72   | 83.83    | 35  | 611.26   | 83.10    |
| 4   | 1763.01  | 96.61    | 12  | 1351.30  | 74.57    | 20  | 1015.73  | 83.93    | 28  | 788.98   | 82.68    | 36  | 555.72   | 84.23    |
| 5   | 1685.40  | 88.71    | 13  | 1290.08  | 77.00    | 21  | 982.77   | 86.23    | 29  | 749.35   | 77.09    | 37  | 531.39   | 85.62    |
| 6   | 1651.68  | 86.67    | 14  | 1247.76  | 72.08    | 22  | 958.06   | 86.47    | 30  | 723.62   | 77.99    | 38  | 514.18   | 85.68    |
| 7   | 1620.97  | 79.39    | 15  | 1195.12  | 79.99    | 23  | 921.34   | 88.30    | 31  | 701.32   | 80.31    |     |          |          |
| 8   | 1568.03  | 68.09    | 16  | 1171.82  | 78.52    | 24  | 879.64   | 84.35    | 32  | 690.49   | 79.87    |     |          |          |

**Figure 33.** IR spectrum of compound 17d

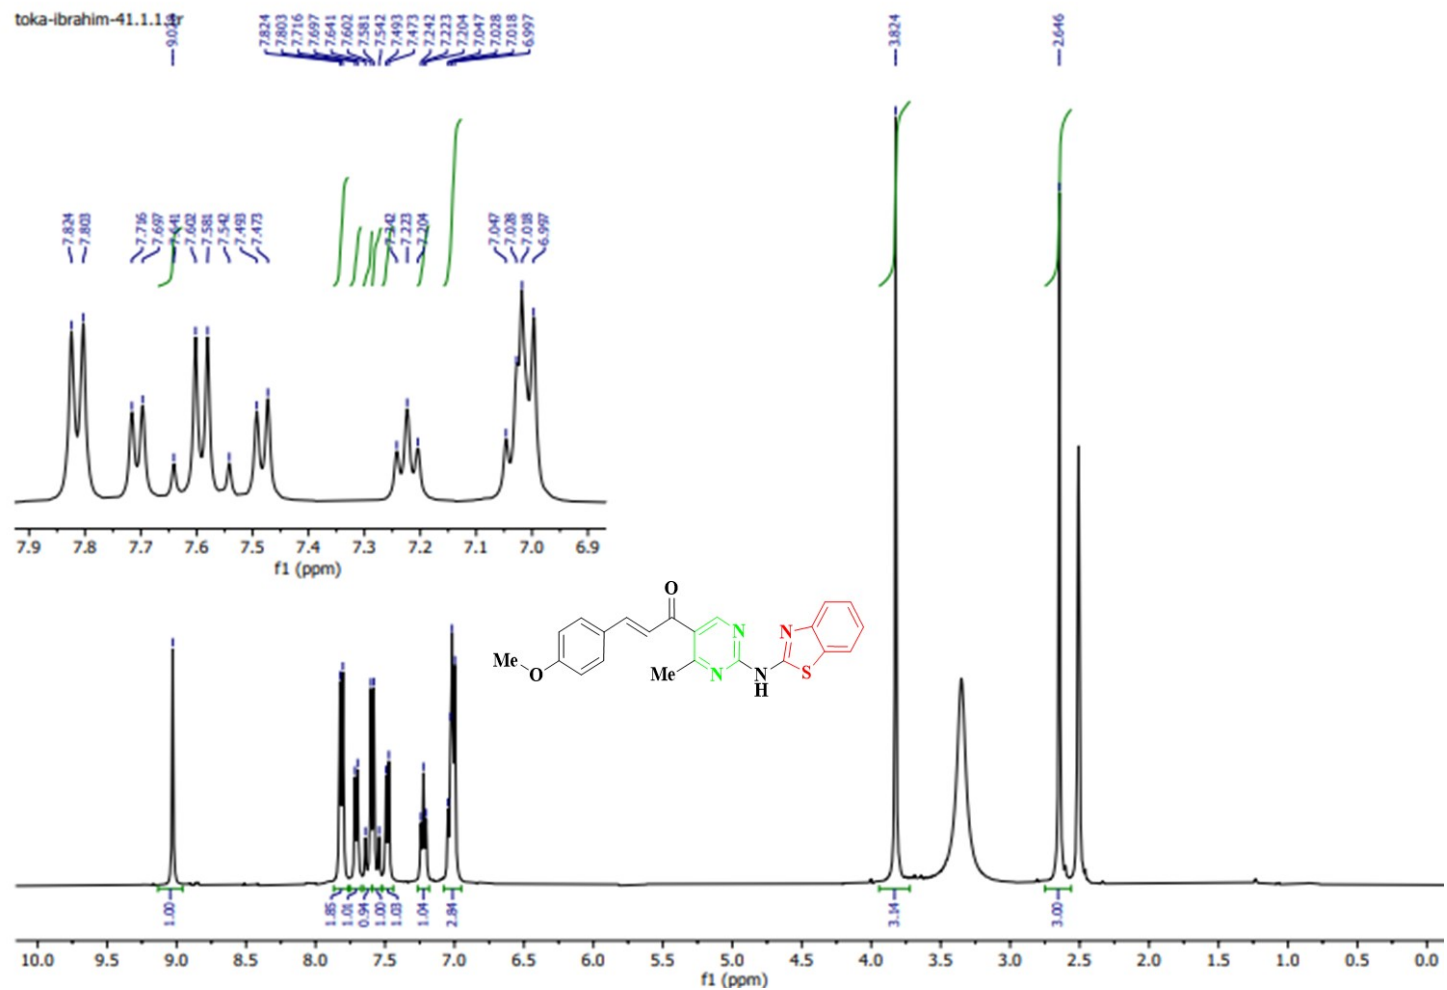

Figure 34.  $^1\text{H}$  NMR spectrum of compound 17d

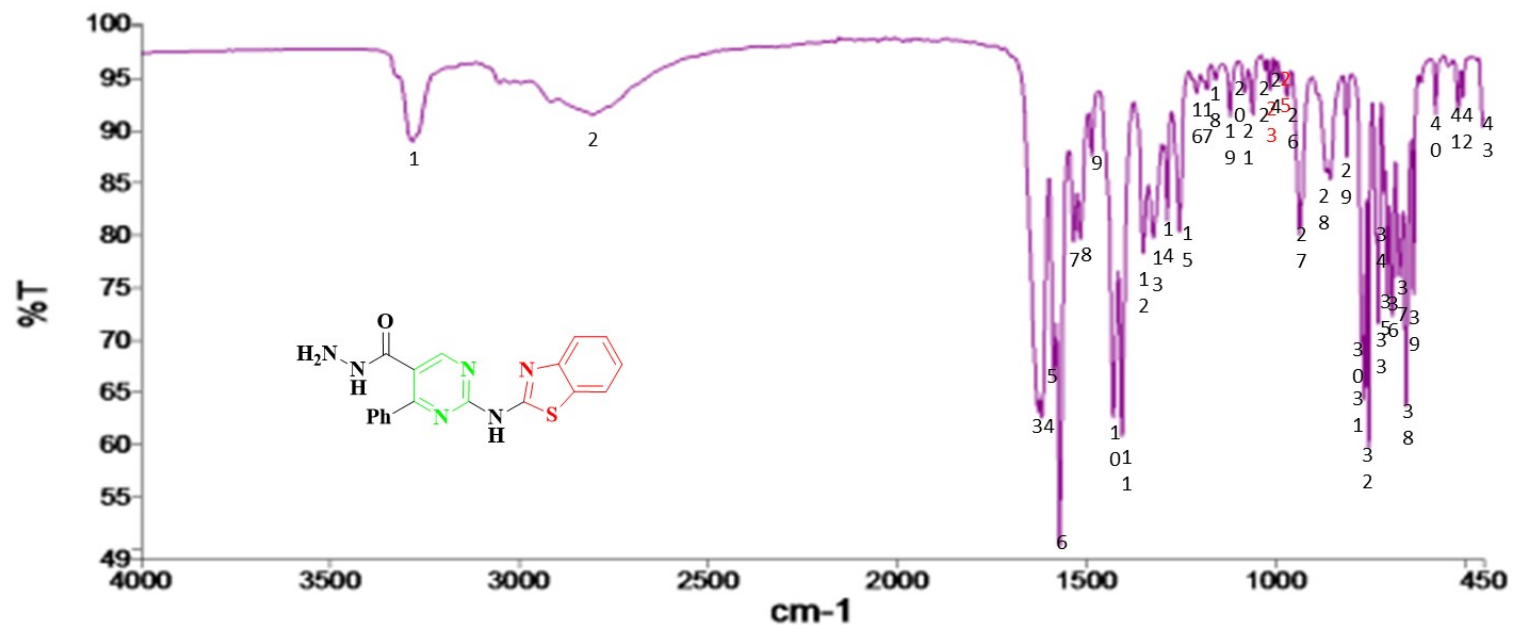

| No. | Position | Intinsty | No. | Position | Intinsty | No. | Position | Intinsty | No. | Position | Intinsty | No. | Position | Intinsty |
|-----|----------|----------|-----|----------|----------|-----|----------|----------|-----|----------|----------|-----|----------|----------|
| 1   | 3285.18  | 89.06    | 10  | 1429.30  | 62.55    | 19  | 1120.81  | 91.43    | 28  | 854.88   | 85.40    | 37  | 671.69   | 76.11    |
| 2   | 2807.00  | 91.63    | 11  | 1406.68  | 60.75    | 20  | 1081.26  | 93.78    | 29  | 811.62   | 87.52    | 38  | 653.97   | 63.60    |
| 3   | 1628.77  | 63.02    | 12  | 1350.21  | 78.36    | 21  | 1060.13  | 91.63    | 30  | 771.91   | 69.77    | 39  | 634.57   | 74.38    |
| 4   | 1618.23  | 62.52    | 13  | 1323.61  | 79.80    | 22  | 1027.48  | 95.91    | 31  | 765.73   | 64.32    | 40  | 575.75   | 91.67    |
| 5   | 1586.06  | 66.14    | 14  | 1286.78  | 81.46    | 23  | 1014.65  | 94.00    | 32  | 753.58   | 59.65    | 41  | 516.88   | 91.93    |
| 6   | 1571.16  | 50.22    | 15  | 1254.43  | 80.42    | 24  | 1001.13  | 95.29    | 33  | 727.87   | 71.57    | 42  | 504.01   | 93.30    |
| 7   | 1534.08  | 79.44    | 16  | 1208.80  | 93.73    | 25  | 987.67   | 94.75    | 34  | 712.78   | 84.06    | 43  | 451.84   | 90.50    |
| 8   | 1517.07  | 79.75    | 17  | 1182.14  | 94.05    | 26  | 969.17   | 93.35    | 35  | 703.94   | 74.23    |     |          |          |
| 9   | 1486.71  | 87.68    | 18  | 1158.03  | 94.92    | 27  | 936.12   | 80.07    | 36  | 690.84   | 72.30    |     |          |          |

**Figure 35.** IR spectrum of compound 18



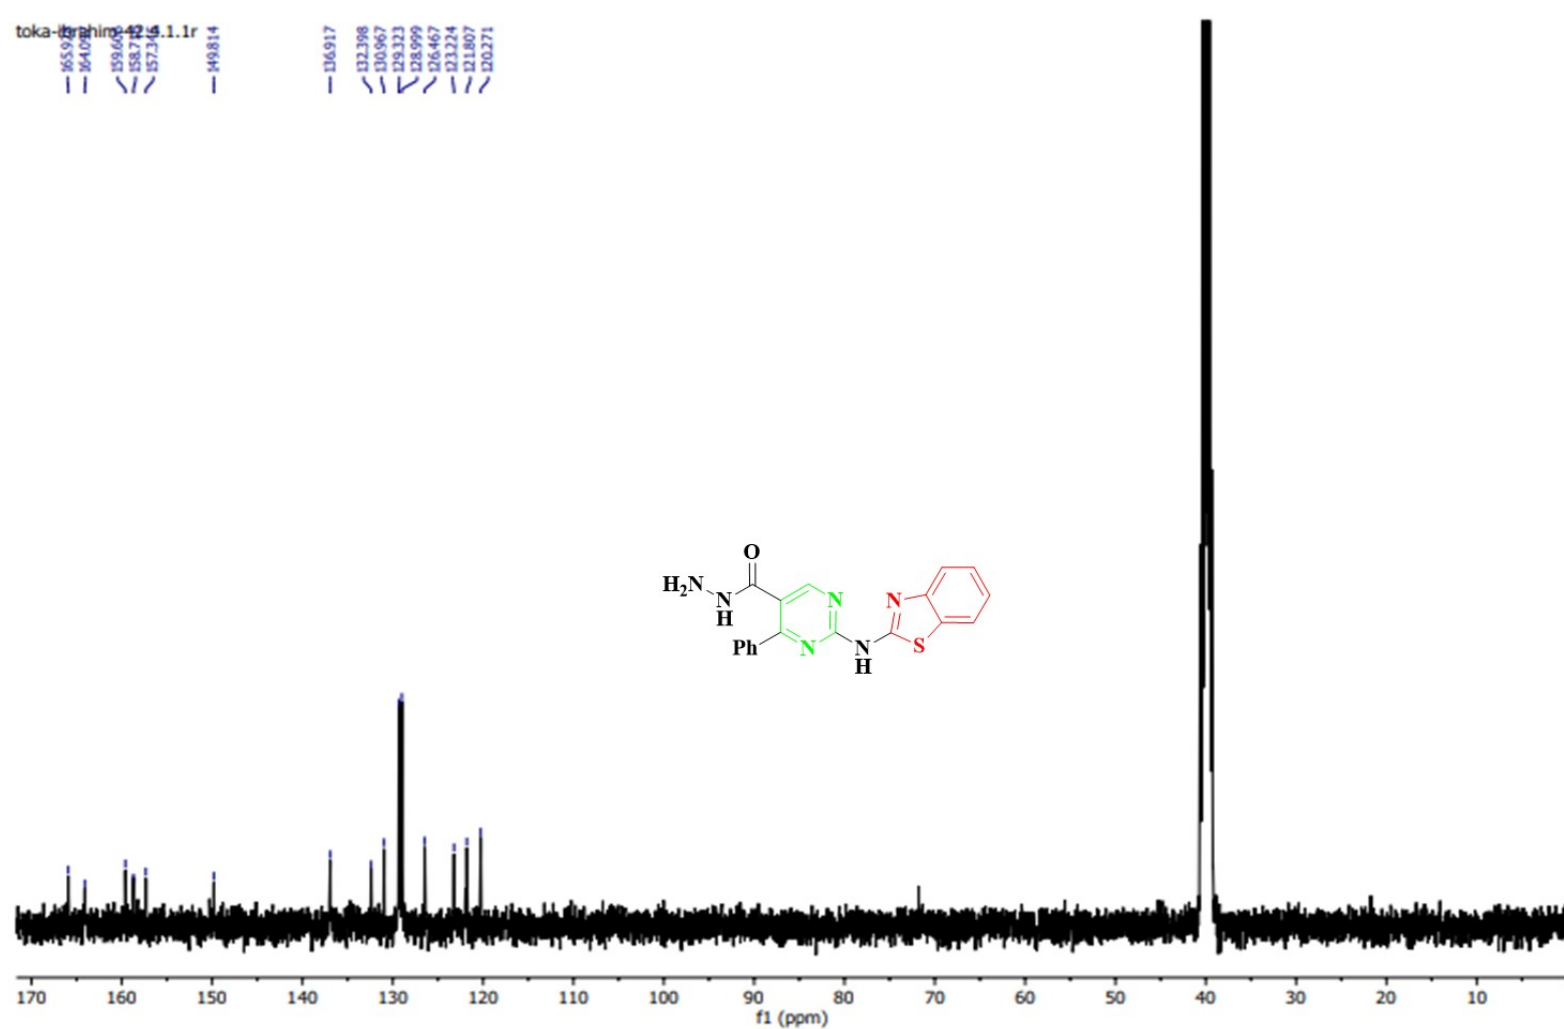

Figure 37. <sup>13</sup>C NMR spectrum of compound 18

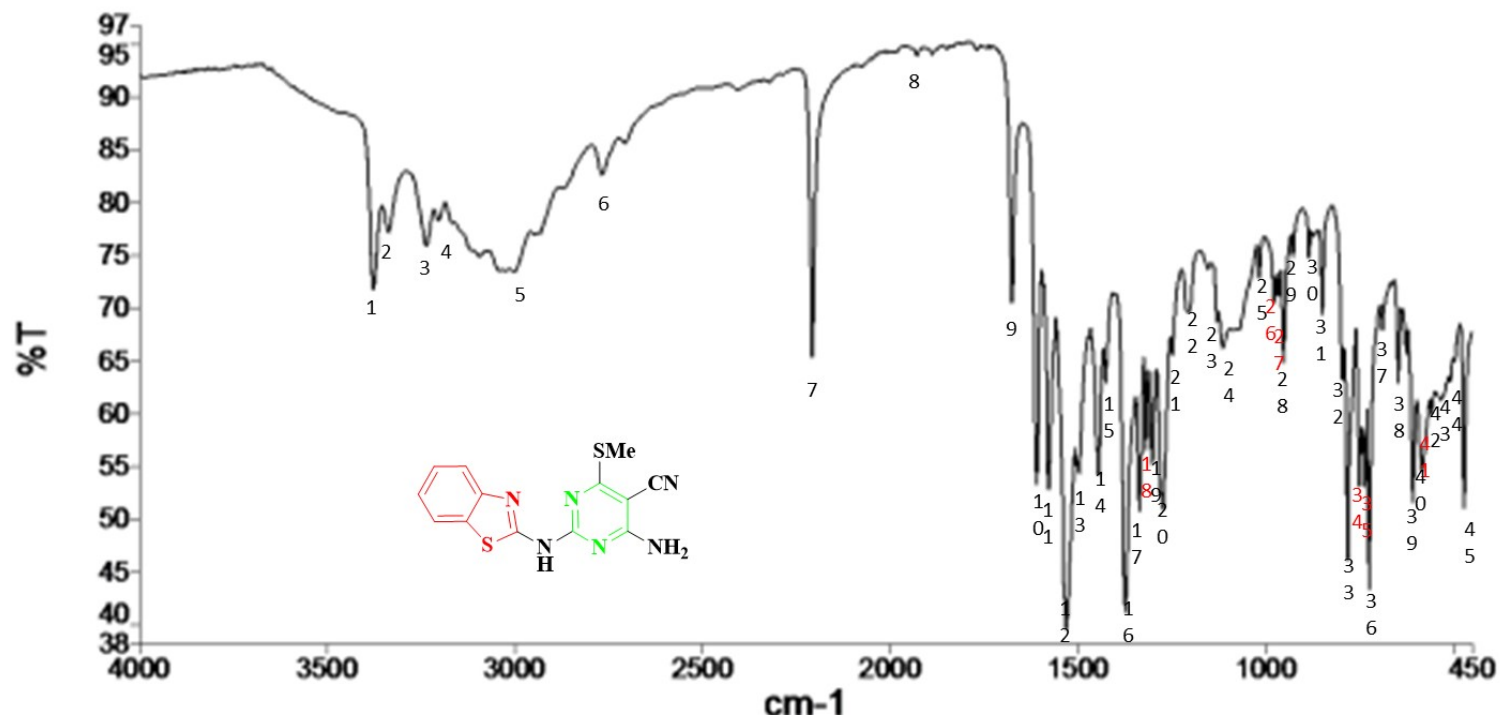

| No. | Position | Intinsty | No. | Position | Intinsty | No. | Position | Intinsty | No. | Position | Intinsty | No. | Position | Intinsty |
|-----|----------|----------|-----|----------|----------|-----|----------|----------|-----|----------|----------|-----|----------|----------|
| 1   | 3379.48  | 71.84    | 10  | 1610.16  | 53.29    | 19  | 1302.24  | 55.17    | 28  | 951.69   | 64.88    | 37  | 688.24   | 68.01    |
| 2   | 3339.59  | 77.23    | 11  | 1578.68  | 52.76    | 20  | 1272.96  | 50.88    | 29  | 926.70   | 74.95    | 38  | 645.92   | 62.98    |
| 3   | 3238.48  | 75.96    | 12  | 1531.64  | 39.54    | 21  | 1248.89  | 65.60    | 30  | 884.56   | 74.92    | 39  | 624.26   | 65.61    |
| 4   | 3205.87  | 78.40    | 13  | 1497.18  | 54.33    | 22  | 1204.62  | 69.64    | 31  | 848.46   | 69.43    | 40  | 606.91   | 51.58    |
| 5   | 3004.34  | 73.45    | 14  | 1445.56  | 54.16    | 23  | 1130.07  | 68.74    | 32  | 795.32   | 63.25    | 41  | 582.75   | 54.56    |
| 6   | 2769.92  | 82.70    | 15  | 1426.44  | 62.90    | 24  | 1113.66  | 66.25    | 33  | 780.85   | 46.08    | 42  | 556.78   | 59.98    |
| 7   | 2208.92  | 65.36    | 16  | 1373.81  | 41.13    | 25  | 1017.38  | 72.95    | 34  | 749.98   | 53.06    | 43  | 533.27   | 61.31    |
| 8   | 1930.31  | 94.09    | 17  | 1336.64  | 50.72    | 26  | 976.92   | 70.60    | 35  | 734.28   | 53.07    | 44  | 507.99   | 62.98    |
| 9   | 1676.17  | 70.59    | 18  | 1318.02  | 56.60    | 27  | 964.43   | 71.17    | 36  | 723.90   | 43.26    | 45  | 470.42   | 51.00    |

Figure 38. IR spectrum of compound 20

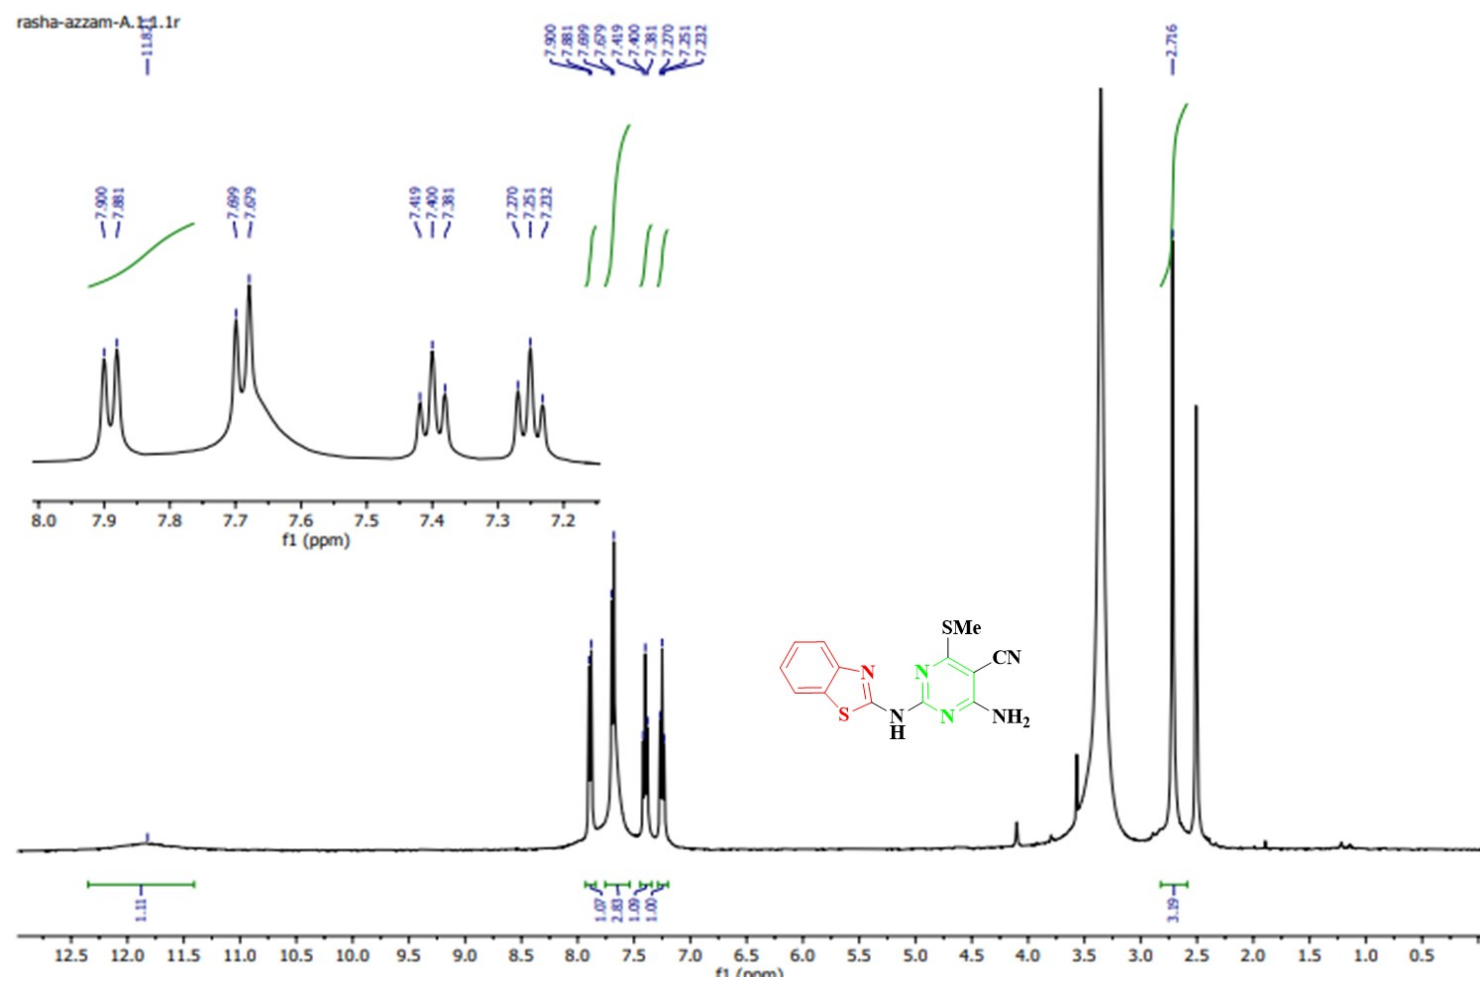

Figure 39. <sup>1</sup>H NMR spectrum of compound 20



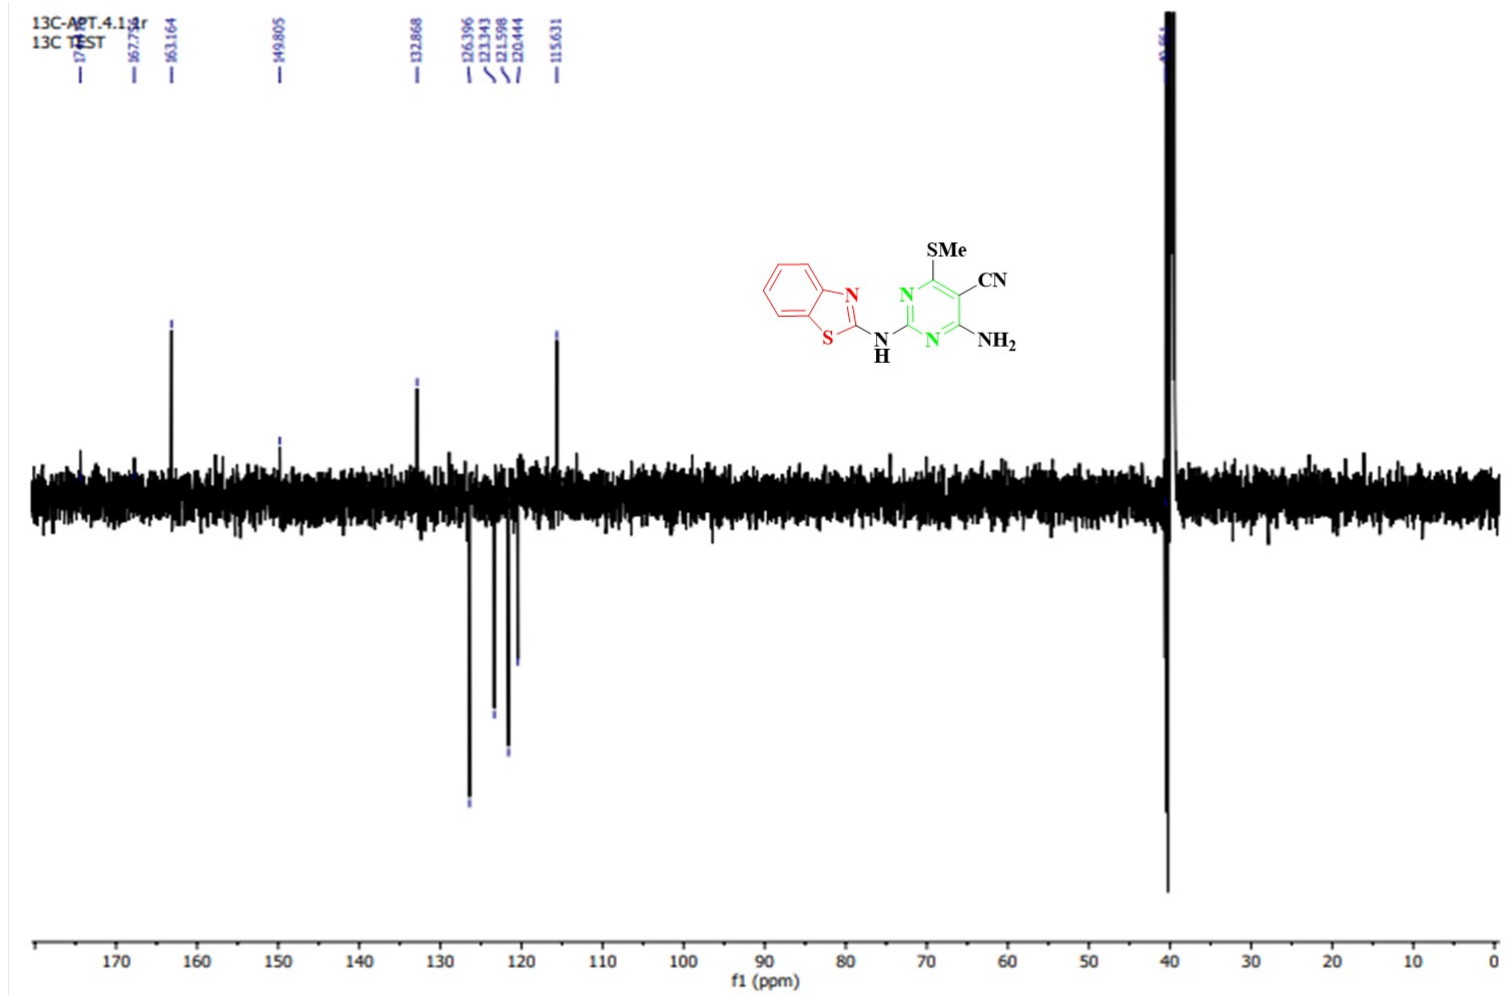

Figure 40. <sup>13</sup>C NMR spectrum of compound 20

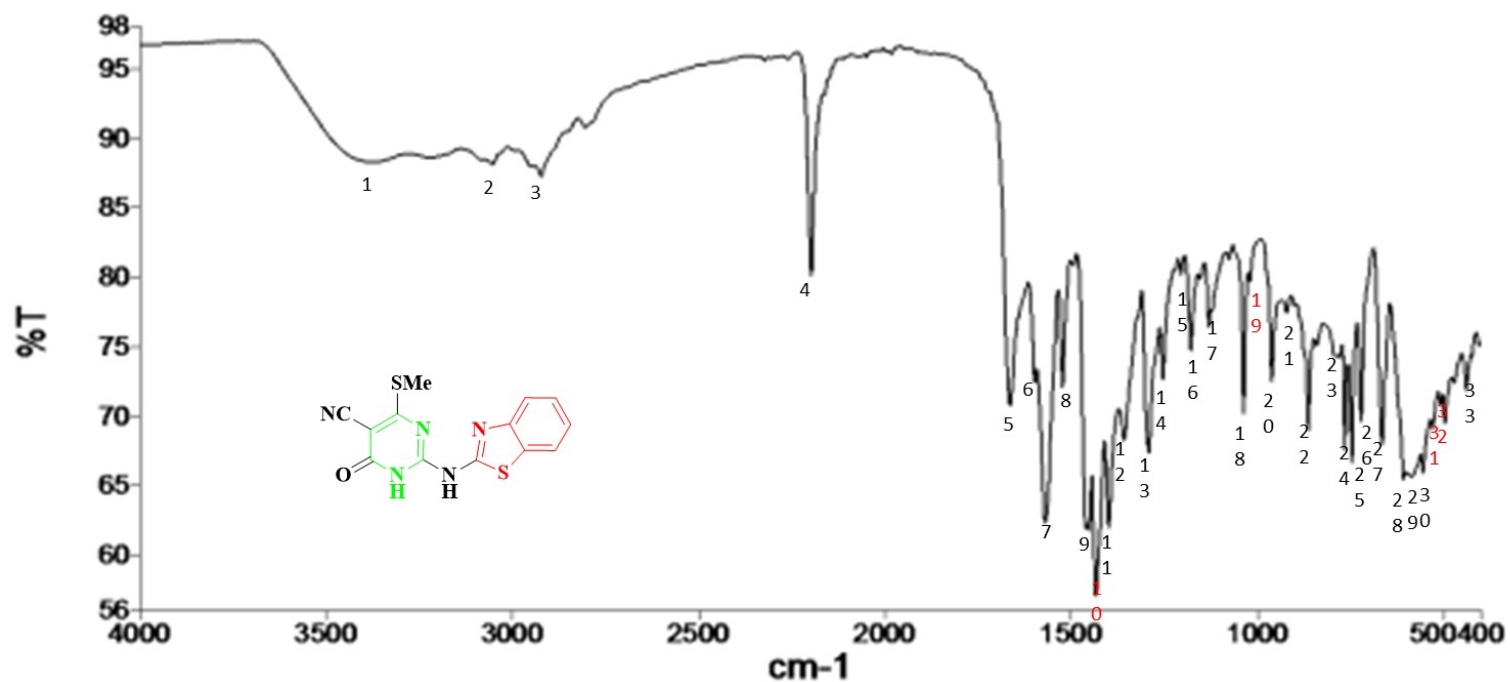

| No. | Position | Intensity | No. | Position | Intensity | No. | Position | Intensity | No. | Position | Intensity | No. | Position | Intensity |
|-----|----------|-----------|-----|----------|-----------|-----|----------|-----------|-----|----------|-----------|-----|----------|-----------|
| 1   | 3378.59  | 88.35     | 8   | 1523.08  | 72.09     | 15  | 1204.85  | 80.24     | 22  | 862.29   | 68.99     | 29  | 554.11   | 65.90     |
| 2   | 3055.36  | 88.18     | 9   | 1452.50  | 61.76     | 16  | 1178.16  | 74.76     | 23  | 778.43   | 74.20     | 30  | 527.95   | 69.11     |
| 3   | 2924.68  | 87.32     | 10  | 1433.83  | 57.02     | 17  | 1129.62  | 76.50     | 24  | 764.23   | 67.59     | 31  | 506.92   | 70.86     |
| 4   | 2198.45  | 80.17     | 11  | 1398.95  | 61.93     | 18  | 1036.59  | 70.17     | 25  | 745.08   | 66.66     | 32  | 495.01   | 69.49     |
| 5   | 1663.77  | 70.81     | 12  | 1357.68  | 68.28     | 19  | 1019.42  | 79.76     | 26  | 720.50   | 69.6      | 33  | 436.99   | 71.84     |
| 6   | 1597.67  | 72.47     | 13  | 1290.69  | 67.35     | 20  | 960.81   | 72.50     | 27  | 663.90   | 67.90     |     |          |           |
| 7   | 1569.66  | 62.32     | 14  | 1253.44  | 72.72     | 21  | 920.40   | 77.49     | 28  | 606.72   | 65.46     |     |          |           |

**Figure 41.** IR spectrum of compound 22

toka-ibrahim-13.1.1.1r

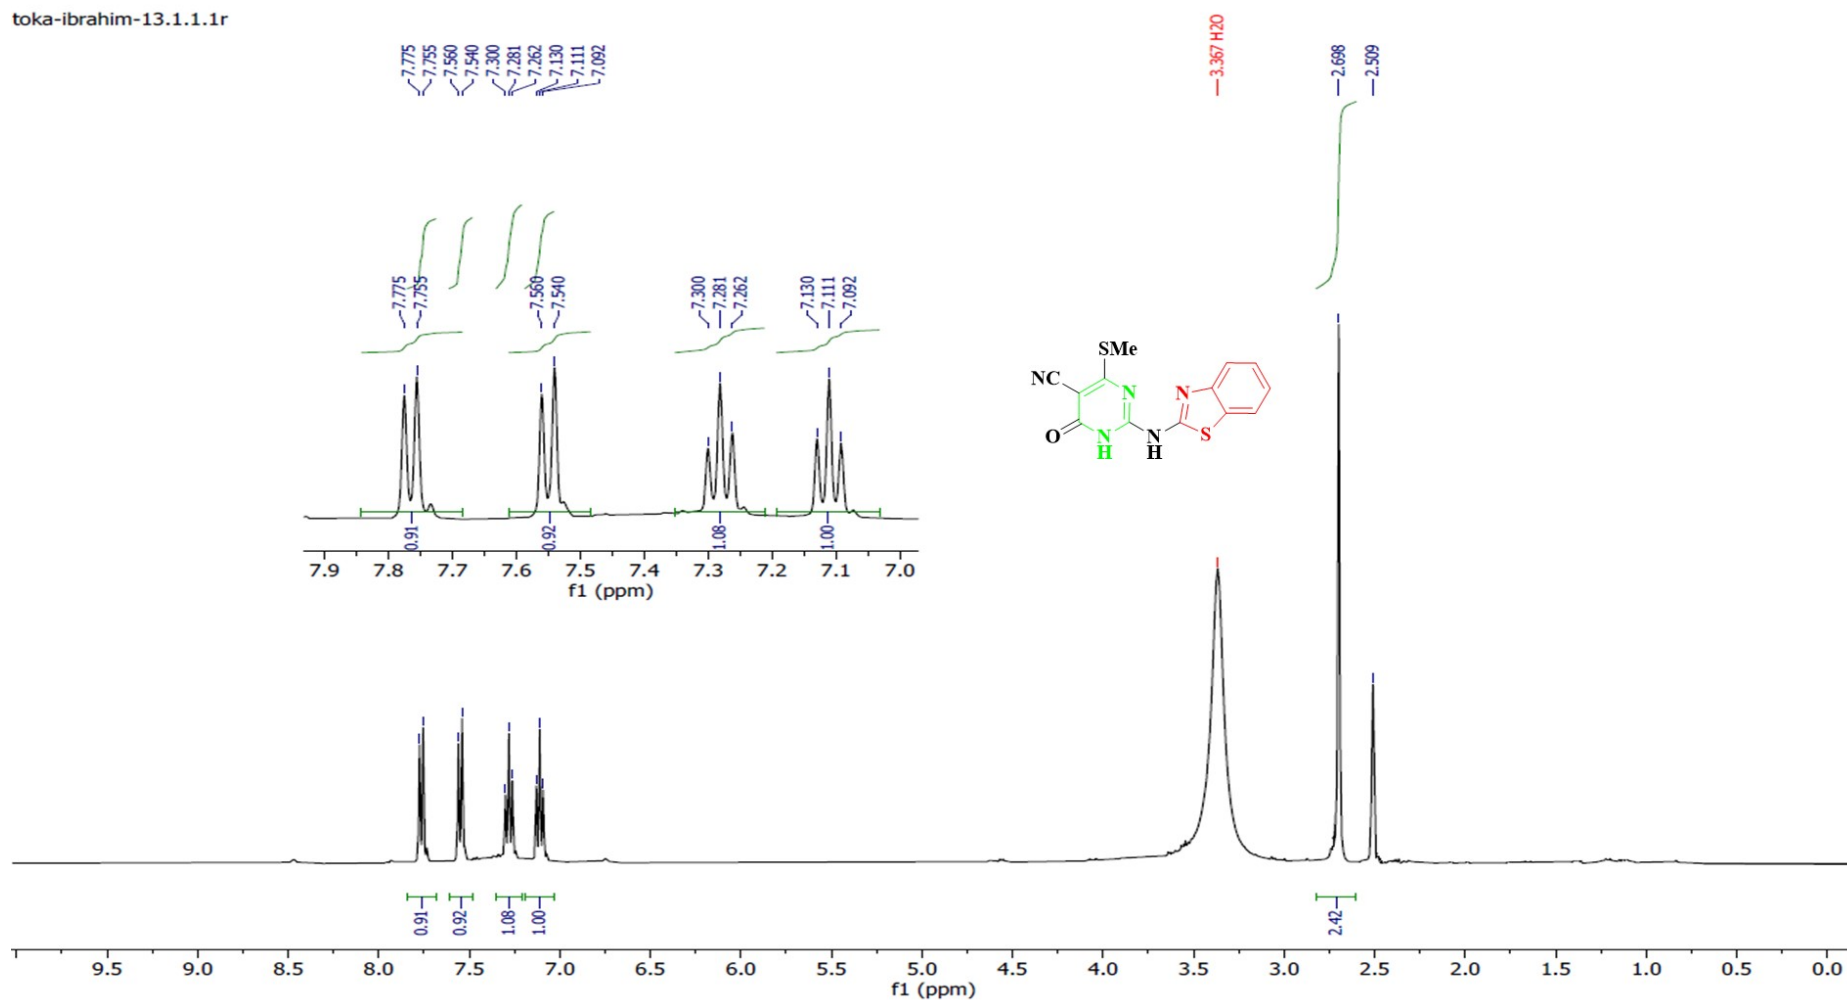

Figure 42. <sup>1</sup>H NMR spectrum of compound 22

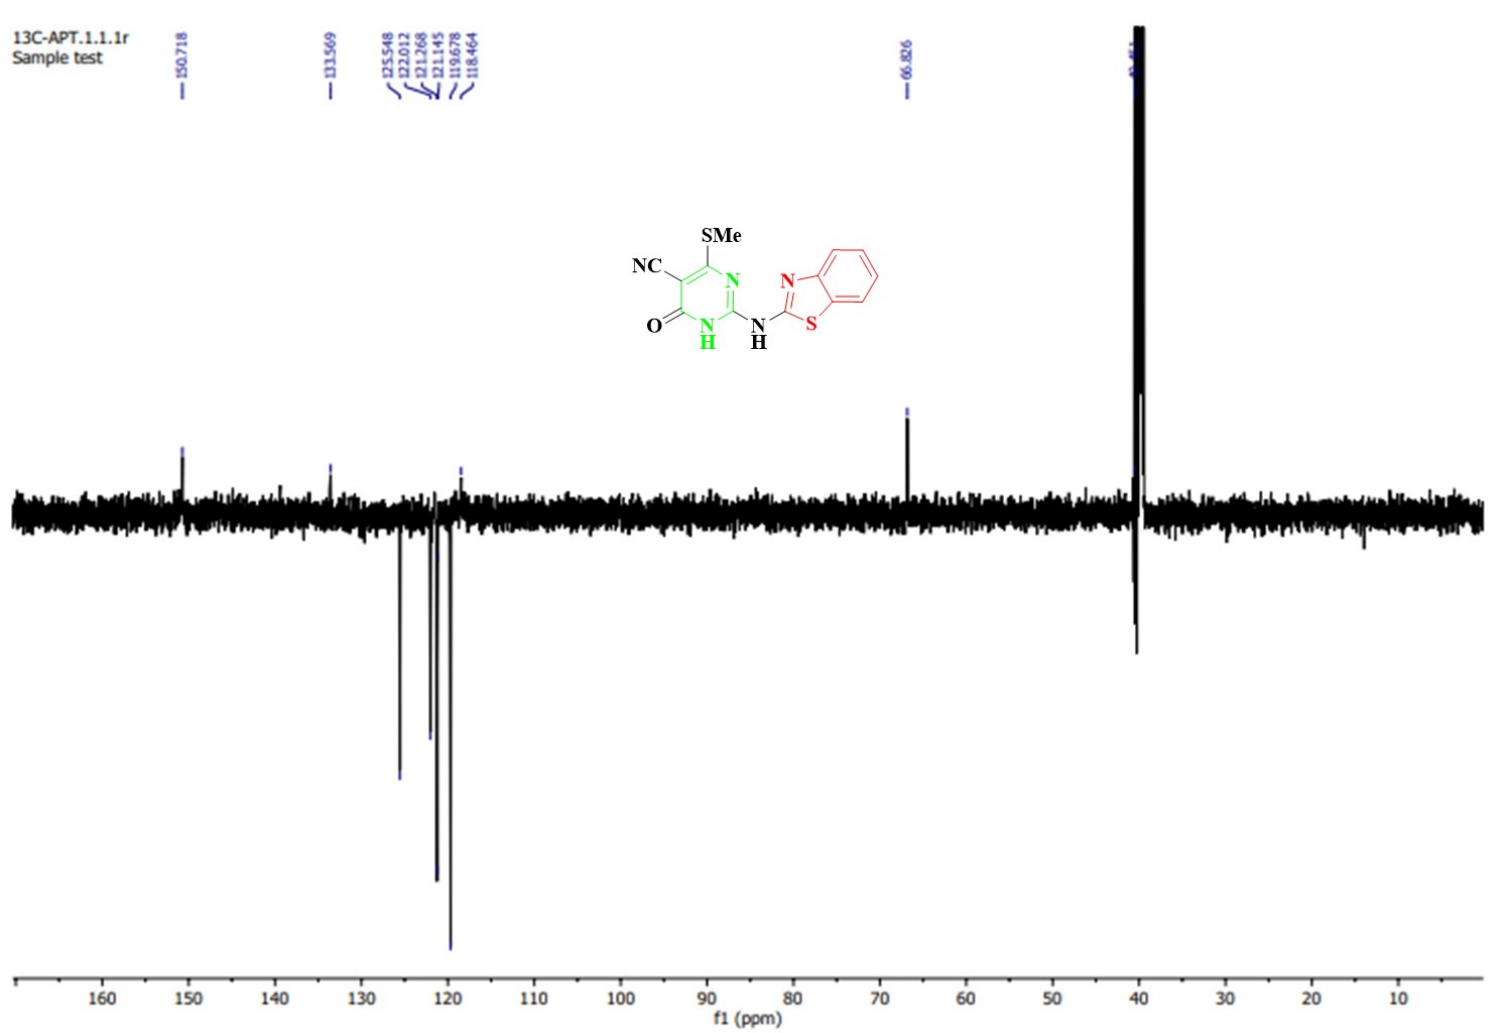

**Figure 43.**  $^{13}\text{C}$  NMR spectrum of compound **22**

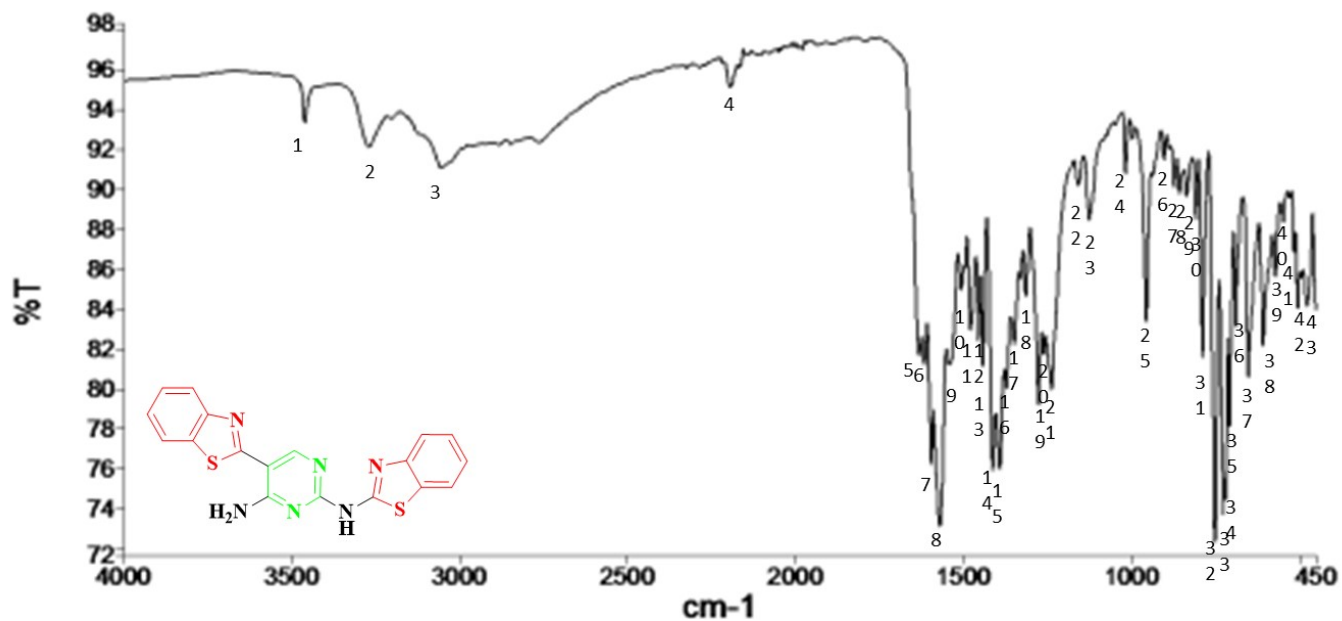

| No. | Position | Intinsty | No. | Position | Intinsty | No. | Position | Intinsty | No. | Position | Intinsty | No. | Position | Intinsty |
|-----|----------|----------|-----|----------|----------|-----|----------|----------|-----|----------|----------|-----|----------|----------|
| 1   | 3464.19  | 93.40    | 10  | 1505.92  | 84.94    | 19  | 1276.52  | 79.22    | 28  | 855.46   | 89.84    | 37  | 650.94   | 80.61    |
| 2   | 3273.37  | 92.18    | 11  | 1478.66  | 82.95    | 20  | 1260.07  | 81.76    | 29  | 834.36   | 89.69    | 38  | 606.72   | 82.17    |
| 3   | 3057.47  | 91.13    | 12  | 1455.23  | 82.43    | 21  | 1236.84  | 79.97    | 30  | 807.29   | 88.52    | 39  | 570.20   | 85.66    |
| 4   | 2195.74  | 95.21    | 13  | 1441.88  | 81.15    | 22  | 1157.67  | 90.27    | 31  | 786.91   | 81.58    | 40  | 546.30   | 88.40    |
| 5   | 1632.17  | 81.70    | 14  | 1412.50  | 75.89    | 23  | 1124.61  | 88.51    | 32  | 750.88   | 72.27    | 41  | 514.52   | 86.88    |
| 6   | 1616.70  | 81.18    | 15  | 1391.72  | 75.96    | 24  | 1016.89  | 90.84    | 33  | 726.03   | 73.65    | 42  | 503.29   | 84.07    |
| 7   | 1595.34  | 76.18    | 16  | 1372.08  | 80.05    | 25  | 955.15   | 83.37    | 34  | 718.45   | 74.45    | 43  | 475.06   | 84.16    |
| 8   | 1570.32  | 73.07    | 17  | 1348.56  | 82.26    | 26  | 902.08   | 91.55    | 35  | 706.43   | 78.11    |     |          |          |
| 9   | 1542.97  | 81.21    | 18  | 1314.59  | 84.67    | 27  | 871.74   | 90.16    | 36  | 687.96   | 83.13    |     |          |          |

**Figure 44.** IR spectrum of compound 24

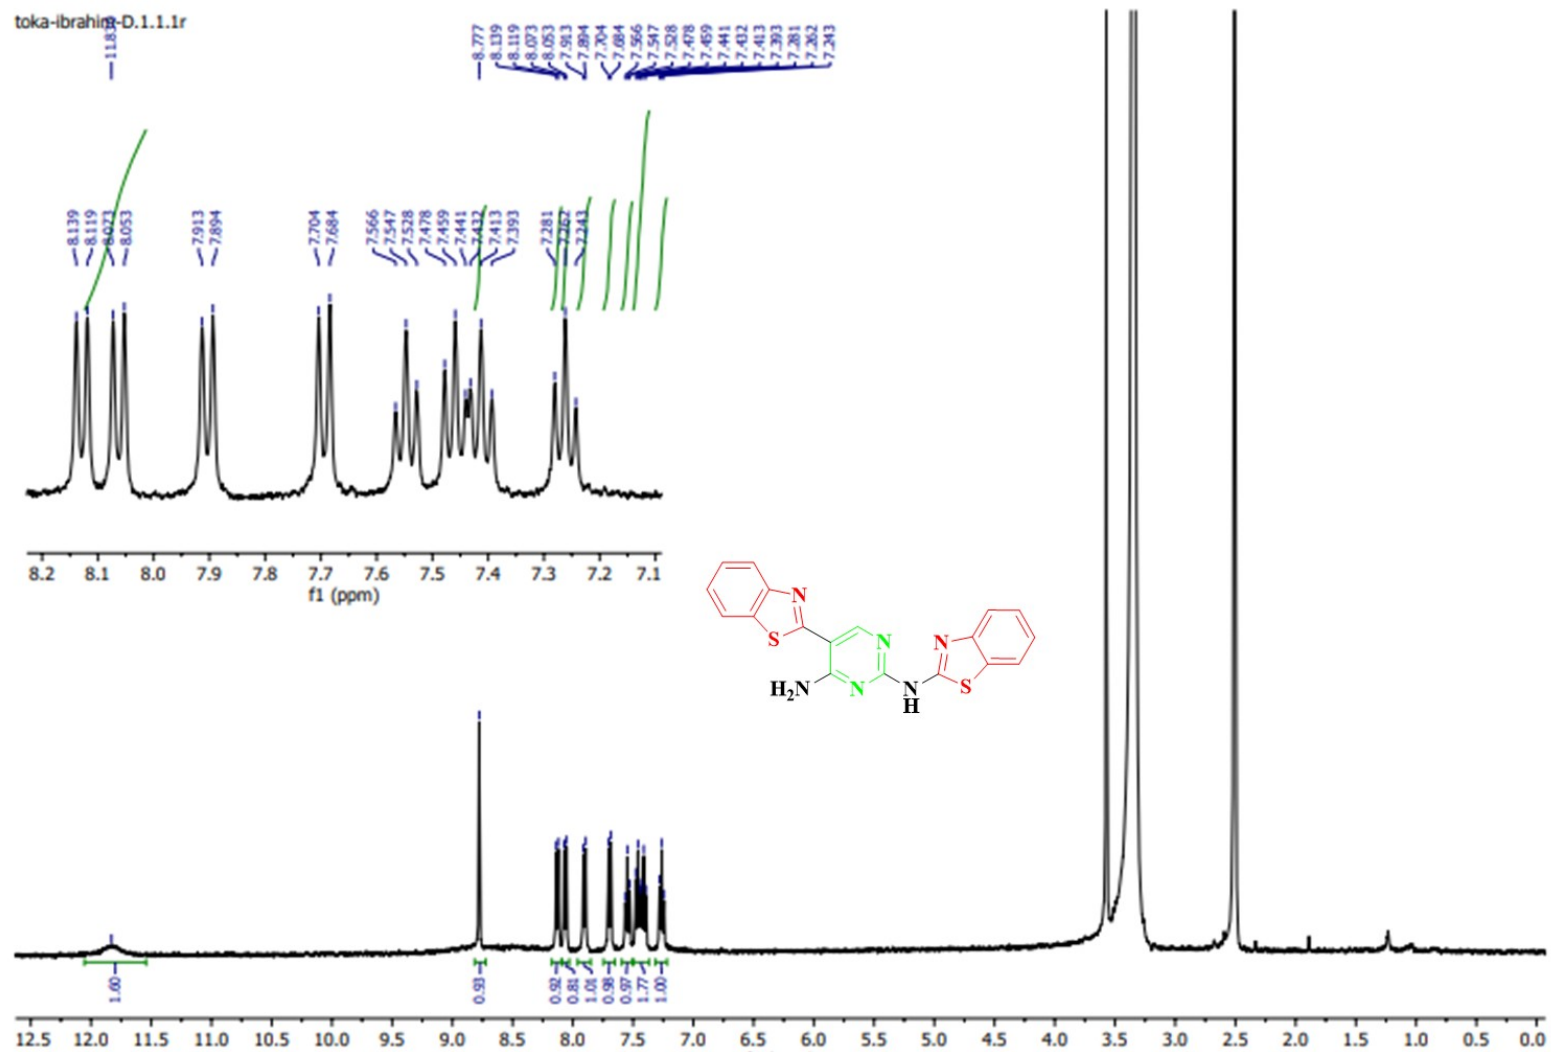

Figure 45.  $^1\text{H}$  NMR spectrum of compound 24

## Assessment of cytotoxic effect of different pyrimidine derivatives on cancer cell lines:

**Table 1. MTT assay results for 10 formulas in HepG2 cancer cells.**

| Experiment      | HepG2  | 7a    | 7b    | 7c    | 7d    | 13a   | 13b   | 13c   | 15a   | 15b   | 15c   | 5-FU         |
|-----------------|--------|-------|-------|-------|-------|-------|-------|-------|-------|-------|-------|--------------|
| OD1             | 3.518  | 3.173 | 2.418 | 2.111 | 3.273 | 2.658 | 2.479 | 2.934 | 2.863 | 3.381 | 2.572 | <b>2.256</b> |
| OD2             | 3.328  | 2.863 | 2.574 | 2.052 | 3.381 | 2.514 | 2.315 | 2.913 | 2.719 | 3.205 | 2.522 | <b>2.082</b> |
| OD3             | 3.482  | 2.815 | 2.522 | 2.171 | 3.219 | 2.305 | 2.252 | 2.822 | 2.806 | 3.228 | 2.419 | <b>2.319</b> |
| Average OD      | 3.443  | 2.950 | 2.505 | 2.111 | 3.291 | 2.492 | 2.349 | 2.890 | 2.796 | 3.271 | 2.504 | <b>2.219</b> |
| Viability (%) 1 | 102.18 | 92.16 | 70.23 | 61.31 | 95.06 | 77.20 | 72.00 | 85.22 | 83.15 | 98.20 | 74.70 | <b>65.52</b> |
| Viability (%) 2 | 96.66  | 83.15 | 74.76 | 59.60 | 98.20 | 73.02 | 67.24 | 84.61 | 78.97 | 93.09 | 73.25 | <b>60.47</b> |
| Viability (%) 3 | 101.13 | 81.76 | 73.25 | 63.06 | 93.4  | 66.95 | 65.41 | 81.96 | 81.50 | 93.76 | 70.26 | <b>67.35</b> |
| Viability (%)   | 99.93  | 85.64 | 72.70 | 61.29 | 95.53 | 72.35 | 68.18 | 83.88 | 81.16 | 94.96 | 72.69 | <b>64.41</b> |

OD: optic density. MTT: 4,5-dimethylthiazol-2-yl)-2,5-diphenyltetrazolium bromide

**Table 2. MTT assay results for 10 formulas in HepG2 cancer cells.**

| Experiment      | HepG2  | 17a   | 17b   | 17c   | 17d   | 18    | 20    | 22    | 24    | 5-FU         |
|-----------------|--------|-------|-------|-------|-------|-------|-------|-------|-------|--------------|
| OD1             | 3.518  | 2.934 | 2.658 | 2.765 | 2.111 | 2.479 | 3.385 | 2.866 | 2.765 | <b>2.256</b> |
| OD2             | 3.328  | 2.741 | 2.571 | 2.811 | 2.052 | 2.315 | 3.272 | 2.716 | 2.711 | <b>2.082</b> |
| OD3             | 3.482  | 2.836 | 2.628 | 2.739 | 2.145 | 2.115 | 3.162 | 2.86  | 2.628 | <b>2.319</b> |
| Average OD      | 3.443  | 2.837 | 2.619 | 2.772 | 2.103 | 2.303 | 3.273 | 2.814 | 2.701 | <b>2.219</b> |
| Viability (%) 1 | 102.18 | 85.22 | 77.20 | 80.31 | 61.31 | 72.00 | 98.32 | 83.24 | 80.31 | <b>65.52</b> |
| Viability (%) 2 | 96.66  | 79.61 | 74.67 | 81.64 | 59.60 | 67.24 | 95.03 | 78.88 | 78.74 | <b>60.47</b> |
| Viability (%) 3 | 101.13 | 82.37 | 76.33 | 79.55 | 62.30 | 61.43 | 91.84 | 83.07 | 76.33 | <b>67.35</b> |
| Viability (%)   | 99.93  | 82.35 | 76.02 | 80.45 | 61.04 | 66.85 | 95.01 | 81.68 | 78.41 | <b>64.41</b> |

OD: optic density. MTT: 4,5-dimethylthiazol-2-yl)-2,5-diphenyltetrazolium bromide

**Table 3. MTT assay results for 10 formulas in HCT116 cancer cells.**

| Experiment      | HCT 116 | 7a    | 7b    | 7c    | 7d    | 13a   | 13b   | 13c   | 15a   | 15b   | 15c   | 5-FU         |
|-----------------|---------|-------|-------|-------|-------|-------|-------|-------|-------|-------|-------|--------------|
| OD1             | 3.571   | 2.807 | 2.463 | 3.169 | 3.192 | 2.724 | 3.322 | 2.412 | 3.045 | 3.192 | 2.463 | <b>2.018</b> |
| OD2             | 3.519   | 2.719 | 2.596 | 3.064 | 3.381 | 2.615 | 3.126 | 2.358 | 3.182 | 3.092 | 2.319 | <b>2.022</b> |
| OD3             | 3.622   | 2.522 | 2.507 | 3.115 | 3.211 | 2.552 | 3.052 | 2.419 | 3.055 | 3.117 | 2.254 | <b>1.955</b> |
| Average OD      | 3.571   | 2.683 | 2.522 | 3.116 | 3.261 | 2.630 | 3.167 | 2.396 | 3.094 | 3.134 | 2.345 | <b>1.998</b> |
| Viability (%) 1 | 100.00  | 78.61 | 68.97 | 88.74 | 89.39 | 76.28 | 93.03 | 67.5  | 85.27 | 89.39 | 68.97 | <b>56.51</b> |
| Viability (%) 2 | 98.54   | 76.14 | 72.70 | 85.80 | 94.68 | 73.23 | 87.54 | 66.03 | 89.11 | 86.59 | 64.94 | <b>56.62</b> |
| Viability (%) 3 | 101.43  | 70.62 | 70.20 | 87.23 | 89.92 | 71.46 | 85.47 | 67.74 | 85.55 | 87.29 | 63.12 | <b>54.75</b> |
| Viability (%)   | 99.99   | 75.12 | 70.62 | 87.26 | 91.33 | 73.66 | 88.68 | 67.11 | 86.64 | 87.75 | 65.68 | <b>55.96</b> |

OD: optic density. MTT: 4,5-dimethylthiazol-2-yl)-2,5-diphenyltetrazolium bromide

**Table 4. MTT assay results for 10 formulas in HCT116 cancer cells.**

| Experiment      | HCT 116 | 17a   | 17b   | 17c   | 17d   | 18    | 20    | 22    | 24    | 5-FU         |
|-----------------|---------|-------|-------|-------|-------|-------|-------|-------|-------|--------------|
| OD1             | 3.571   | 3.066 | 3.155 | 3.069 | 3.168 | 3.322 | 3.019 | 3.195 | 3.229 | <b>2.018</b> |
| OD2             | 3.519   | 2.952 | 3.251 | 3.115 | 3.056 | 3.192 | 3.105 | 3.092 | 3.069 | <b>2.022</b> |
| OD3             | 3.622   | 3.185 | 3.185 | 3.018 | 3.112 | 3.257 | 2.951 | 3.172 | 3.112 | <b>1.955</b> |
| Average OD      | 3.571   | 3.068 | 3.197 | 3.067 | 3.112 | 3.257 | 3.025 | 3.153 | 3.137 | <b>1.998</b> |
| Viability (%) 1 | 100.00  | 85.86 | 88.35 | 85.94 | 88.71 | 93.03 | 84.54 | 89.47 | 90.42 | <b>56.51</b> |
| Viability (%) 2 | 98.54   | 82.67 | 91.04 | 87.23 | 85.58 | 89.39 | 86.95 | 86.59 | 85.94 | <b>56.62</b> |
| Viability (%) 3 | 101.43  | 89.19 | 89.19 | 84.51 | 87.15 | 91.21 | 82.64 | 88.83 | 87.15 | <b>54.75</b> |
| Viability (%)   | 99.99   | 85.90 | 89.53 | 85.90 | 87.15 | 91.21 | 84.71 | 88.29 | 87.84 | <b>55.96</b> |

OD: optic density. MTT: 4,5-dimethylthiazol-2-yl)-2,5-diphenyltetrazolium bromide



**Table 5. MTT assay results for 10 formulas in MCF7 cancer cells.**

| Experiment      | MCF7   | 7a    | 7b     | 7c     | 7d    | 13a   | 13b   | 13c   | 15a    | 15b   | 15c   | 5-FU         |
|-----------------|--------|-------|--------|--------|-------|-------|-------|-------|--------|-------|-------|--------------|
| OD1             | 3.062  | 2.948 | 3.365  | 3.157  | 2.974 | 2.452 | 2.762 | 2.619 | 3.271  | 3.126 | 3.061 | <b>2.152</b> |
| OD2             | 3.152  | 2.715 | 3.061  | 3.348  | 3.126 | 2.319 | 2.715 | 2.974 | 3.182  | 3.085 | 3.115 | <b>1.928</b> |
| OD3             | 3.181  | 2.814 | 2.912  | 3.116  | 2.881 | 2.224 | 3.046 | 2.655 | 3.055  | 2.954 | 3.092 | <b>1.817</b> |
| Average OD      | 3.132  | 2.826 | 3.113  | 3.207  | 2.994 | 2.332 | 2.841 | 2.749 | 3.169  | 3.055 | 3.089 | <b>1.966</b> |
| Viability (%) 1 | 97.77  | 94.13 | 107.44 | 100.80 | 94.96 | 78.29 | 88.19 | 83.62 | 104.44 | 99.81 | 97.73 | <b>68.71</b> |
| Viability (%) 2 | 100.64 | 86.69 | 97.73  | 106.90 | 99.81 | 74.04 | 86.69 | 94.96 | 101.60 | 98.50 | 99.46 | <b>61.56</b> |
| Viability (%) 3 | 101.56 | 89.85 | 92.98  | 99.49  | 91.99 | 71.01 | 97.25 | 84.77 | 97.54  | 94.32 | 98.72 | <b>58.01</b> |
| Viability (%)   | 99.99  | 90.22 | 99.38  | 102.39 | 95.58 | 74.45 | 90.71 | 87.78 | 101.19 | 97.54 | 98.64 | <b>62.76</b> |

OD: optic density. MTT: 4,5-dimethylthiazol-2-yl)-2,5-diphenyltetrazolium bromide

**Table 6. MTT assay results for 10 formulas in MCF7 cancer cells.**

| Experiment      | MCF7   | 17a   | 17b   | 17c    | 17d   | 18    | 20    | 22     | 24    | 5-FU         |
|-----------------|--------|-------|-------|--------|-------|-------|-------|--------|-------|--------------|
| OD1             | 3.062  | 2.974 | 3.224 | 3.242  | 3.157 | 3.046 | 2.671 | 3.252  | 2.151 | <b>2.152</b> |
| OD2             | 3.152  | 2.718 | 3.192 | 3.152  | 3.152 | 2.819 | 2.527 | 3.183  | 2.242 | <b>1.928</b> |
| OD3             | 3.181  | 2.622 | 3.185 | 3.005  | 3.055 | 3.072 | 2.711 | 2.951  | 2.182 | <b>1.817</b> |
| Average OD      | 3.132  | 2.771 | 3.200 | 3.133  | 3.121 | 2.979 | 2.636 | 3.129  | 2.192 | <b>1.966</b> |
| Viability (%) 1 | 97.77  | 94.96 | 102.9 | 103.51 | 100.8 | 97.25 | 85.28 | 103.83 | 68.68 | <b>68.71</b> |
| Viability (%) 2 | 100.64 | 86.78 | 101.9 | 100.64 | 100.6 | 90.01 | 80.68 | 101.63 | 71.58 | <b>61.56</b> |
| Viability (%) 3 | 101.56 | 83.72 | 101.6 | 95.95  | 97.54 | 98.08 | 86.56 | 94.22  | 69.67 | <b>58.01</b> |
| Viability (%)   | 99.99  | 88.48 | 102.2 | 100.03 | 99.66 | 95.11 | 84.17 | 99.89  | 69.98 | <b>62.76</b> |

OD: optic density. MTT: 4,5-dimethylthiazol-2-yl)-2,5-diphenyltetrazolium bromide

## 2. Assessment of IC<sub>50</sub> of the selected compounds:

**Table 7. Determination of IC<sub>50</sub> of compound 7c on HepG2 cells.**

| Experiment       | IC <sub>50</sub> (μmol/mL) |        |        |        |        |        |
|------------------|----------------------------|--------|--------|--------|--------|--------|
|                  | HepG2                      | 0.01   | 0.1    | 1      | 10     | 100    |
| OD1              | 2.989                      | 2.806  | 2.650  | 2.358  | 1.924  | 1.484  |
| OD2              | 2.774                      | 2.644  | 2.592  | 2.311  | 1.866  | 1.448  |
| OD3              | 2.804                      | 2.782  | 2.633  | 2.396  | 1.879  | 1.547  |
| Average OD       | 2.856                      | 2.744  | 2.625  | 2.355  | 1.890  | 1.493  |
| Viability (%) 1  | 104.65%                    | 98.24% | 92.78% | 82.56% | 67.37% | 51.96% |
| Viability (%) 2  | 97.14%                     | 92.59% | 90.74% | 80.91% | 65.35% | 50.69% |
| Viability (%) 3  | 98.17%                     | 97.41% | 92.21% | 83.88% | 65.79% | 54.15% |
| Viability (%)    | 100.90%                    | 95.42% | 91.76% | 81.74% | 66.36% | 51.32% |
| IC <sub>50</sub> | <b>2.73±0.25 μmol/mL</b>   |        |        |        |        |        |

OD: optic density. MTT: 4,5-dimethylthiazol-2-yl)-2,5-diphenyltetrazolium bromide

**Table 8. Determination of IC<sub>50</sub> of compound 13b on HepG2 cells.**

| Experiment       | IC <sub>50</sub> (μmol/mL) |        |        |        |        |        |
|------------------|----------------------------|--------|--------|--------|--------|--------|
|                  | HepG2                      | 0.01   | 0.1    | 1      | 10     | 100    |
| OD1              | 2.989                      | 2.467  | 2.315  | 2.146  | 1.868  | 1.583  |
| OD2              | 2.774                      | 2.558  | 2.276  | 2.139  | 1.866  | 1.733  |
| OD3              | 2.804                      | 2.501  | 2.413  | 2.126  | 1.996  | 1.701  |
| Average OD       | 2.856                      | 2.508  | 2.335  | 2.137  | 1.910  | 1.673  |
| Viability (%) 1  | 104.65%                    | 86.37% | 81.07% | 75.15% | 65.40% | 55.44% |
| Viability (%) 2  | 97.14%                     | 89.56% | 79.71% | 74.88% | 65.33% | 60.67% |
| Viability (%) 3  | 98.17%                     | 87.56% | 84.50% | 74.43% | 69.87% | 59.57% |
| Viability (%)    | 100.90%                    | 87.97% | 80.39% | 75.02% | 65.36% | 58.06% |
| IC <sub>50</sub> | <b>0.56±0.03 μmol/mL</b>   |        |        |        |        |        |

OD: optic density. MTT: 4,5-dimethylthiazol-2-yl)-2,5-diphenyltetrazolium bromide

**Table 9. Determination of IC<sub>50</sub> of compound 17d on HepG2 cells.**

| Experiment       | IC <sub>50</sub> (μmol/mL) |        |        |        |        |        |
|------------------|----------------------------|--------|--------|--------|--------|--------|
|                  | HepG2                      | 0.01   | 0.1    | 1      | 10     | 100    |
| OD1              | 2.989                      | 2.589  | 2.430  | 2.051  | 1.801  | 1.746  |
| OD2              | 2.774                      | 2.569  | 2.345  | 2.080  | 1.870  | 1.718  |
| OD3              | 2.804                      | 2.476  | 2.469  | 2.060  | 1.762  | 1.718  |
| Average OD       | 2.856                      | 2.545  | 2.414  | 2.064  | 1.811  | 1.727  |
| Viability (%) 1  | 101.59%                    | 88.00% | 82.58% | 69.72% | 61.21% | 59.34% |
| Viability (%) 2  | 94.30%                     | 87.32% | 79.70% | 70.71% | 63.56% | 58.40% |
| Viability (%) 3  | 95.33%                     | 84.17% | 83.95% | 70.04% | 59.90% | 58.41% |
| Viability (%)    | 97.95%                     | 87.66% | 81.14% | 70.22% | 62.38% | 58.87% |
| IC <sub>50</sub> | <b>0.41 ±0.01 μmol/mL</b>  |        |        |        |        |        |

OD: optic density. MTT: 4,5-dimethylthiazol-2-yl)-2,5-diphenyltetrazolium bromide

**Table 10. Determination of IC<sub>50</sub> of compound 18 on HepG2 cells.**

| Experiment       | IC <sub>50</sub> (μmol/mL) |        |        |        |        |        |
|------------------|----------------------------|--------|--------|--------|--------|--------|
|                  | HepG2                      | 0.01   | 0.1    | 1      | 10     | 100    |
| OD1              | 2.989                      | 2.608  | 2.443  | 2.144  | 1.730  | 1.673  |
| OD2              | 2.774                      | 2.622  | 2.462  | 2.082  | 1.715  | 1.671  |
| OD3              | 2.804                      | 2.653  | 2.446  | 2.063  | 1.700  | 1.789  |
| Average OD       | 2.856                      | 2.628  | 2.450  | 2.096  | 1.715  | 1.711  |
| Viability (%) 1  | 101.59%                    | 91.31% | 85.55% | 75.07% | 60.56% | 58.58% |
| Viability (%) 2  | 94.30%                     | 91.82% | 86.21% | 72.89% | 60.06% | 58.51% |
| Viability (%) 3  | 95.33%                     | 92.88% | 85.64% | 72.22% | 59.53% | 62.64% |
| Viability (%)    | 97.95%                     | 91.57% | 85.88% | 73.98% | 60.31% | 58.54% |
| IC <sub>50</sub> | <b>0.53 ±0.05 μmol/mL</b>  |        |        |        |        |        |

OD: optic density. MTT: 4,5-dimethylthiazol-2-yl)-2,5-diphenyltetrazolium bromide

**Table 11. Determination of IC<sub>50</sub> of compound 7b on HCT116cells.**

| Experiment       | IC <sub>50</sub> (μmol/mL) |        |        |        |        |        |
|------------------|----------------------------|--------|--------|--------|--------|--------|
|                  | HCT116                     | 0.01   | 0.1    | 1      | 10     | 100    |
| OD1              | 2.768                      | 2.595  | 2.557  | 2.375  | 2.211  | 2.02   |
| OD2              | 2.704                      | 2.613  | 2.583  | 2.406  | 2.107  | 1.852  |
| OD3              | 2.606                      | 2.652  | 2.566  | 2.491  | 2.119  | 1.931  |
| Average OD       | 2.693                      | 2.620  | 2.569  | 2.424  | 2.146  | 1.934  |
| Viability (%) 1  | 102.78%                    | 96.36% | 94.95% | 88.19% | 82.10% | 75.01% |
| Viability (%) 2  | 100.41%                    | 97.03% | 95.92% | 89.34% | 78.24% | 68.77% |
| Viability (%) 3  | 96.77%                     | 98.48% | 95.28% | 92.50% | 78.69% | 71.70% |
| Viability (%)    | 101.60%                    | 96.70% | 95.43% | 88.77% | 80.17% | 71.89% |
| IC <sub>50</sub> | 2.95±0.26 μmol/mL          |        |        |        |        |        |

OD: optic density. MTT: 4,5-dimethylthiazol-2-yl)-2,5-diphenyltetrazolium bromide

**Table 12. Determination of IC<sub>50</sub> of compound 13c on HCT116cells.**

| Experiment       | IC <sub>50</sub> (μmol/mL) |        |        |        |        |        |
|------------------|----------------------------|--------|--------|--------|--------|--------|
|                  | HCT116                     | 0.01   | 0.1    | 1      | 10     | 100    |
| OD1              | 2.768                      | 2.649  | 2.587  | 2.271  | 2.154  | 1.822  |
| OD2              | 2.704                      | 2.621  | 2.572  | 2.261  | 2.107  | 1.917  |
| OD3              | 2.606                      | 2.575  | 2.485  | 2.309  | 2.155  | 1.862  |
| Average OD       | 2.693                      | 2.615  | 2.548  | 2.280  | 2.139  | 1.867  |
| Viability (%) 1  | 102.78%                    | 98.37% | 96.06% | 84.33% | 79.99% | 67.66% |
| Viability (%) 2  | 100.41%                    | 97.33% | 95.51% | 83.96% | 78.24% | 71.18% |
| Viability (%) 3  | 96.77%                     | 95.62% | 92.28% | 85.74% | 80.02% | 69.14% |
| Viability (%)    | 101.60%                    | 97.85% | 95.79% | 84.14% | 79.11% | 69.42% |
| IC <sub>50</sub> | 1.033±0.06 μmol/mL         |        |        |        |        |        |

OD: optic density. MTT: 4,5-dimethylthiazol-2-yl)-2,5-diphenyltetrazolium bromide

**Table 13. Determination of IC<sub>50</sub> of compound 15c on HCT116 cells.**

| Experiment       | IC <sub>50</sub> (μmol/mL) |        |        |        |        |        |
|------------------|----------------------------|--------|--------|--------|--------|--------|
|                  | HCT116                     | 0.01   | 0.1    | 1      | 10     | 100    |
| OD1              | 2.768                      | 2.284  | 1.416  | 1.258  | 1.179  | 1.041  |
| OD2              | 2.704                      | 2.296  | 1.466  | 1.311  | 1.134  | 1.069  |
| OD3              | 2.606                      | 2.062  | 1.396  | 1.230  | 1.112  | 1.038  |
| Average OD       | 2.693                      | 2.214  | 1.426  | 1.267  | 1.142  | 1.049  |
| Viability (%) 1  | 102.78%                    | 84.81% | 52.58% | 46.72% | 43.78% | 38.67% |
| Viability (%) 2  | 100.41%                    | 85.26% | 54.44% | 48.69% | 42.11% | 39.68% |
| Viability (%) 3  | 96.77%                     | 76.57% | 51.84% | 45.68% | 41.29% | 38.56% |
| Viability (%)    | 101.60%                    | 85.04% | 53.51% | 47.71% | 42.95% | 39.18% |
| IC <sub>50</sub> | 0.02±0.001 μmol/mL         |        |        |        |        |        |

OD: optic density. MTT: 4,5-dimethylthiazol-2-yl)-2,5-diphenyltetrazolium bromide

**Table 14. Determination of IC<sub>50</sub> of compound 24 on MCF7 cells.**

| Experiment       | IC <sub>50</sub> (μmol/mL) |        |        |        |        |        |
|------------------|----------------------------|--------|--------|--------|--------|--------|
|                  | MCF7                       | 0.01   | 0.1    | 1      | 10     | 100    |
| OD1              | 2.869                      | 2.790  | 2.654  | 2.362  | 2.172  | 1.943  |
| OD2              | 2.859                      | 2.774  | 2.716  | 2.461  | 2.043  | 1.845  |
| OD3              | 2.736                      | 2.780  | 2.719  | 2.450  | 2.128  | 1.913  |
| Average OD       | 2.821                      | 2.781  | 2.697  | 2.424  | 2.114  | 1.900  |
| Viability (%) 1  | 100.73%                    | 97.95% | 93.18% | 82.94% | 76.27% | 68.23% |
| Viability (%) 2  | 100.38%                    | 97.39% | 95.38% | 86.40% | 71.72% | 64.77% |
| Viability (%) 3  | 96.06%                     | 97.62% | 95.48% | 86.02% | 74.73% | 67.18% |
| Viability (%)    | 100.55%                    | 97.67% | 94.28% | 84.67% | 74.00% | 66.50% |
| IC <sub>50</sub> | 1.485±0.15 μmol/mL         |        |        |        |        |        |

OD: optic density. MTT: 4,5-dimethylthiazol-2-yl)-2,5-diphenyltetrazolium bromide
